# Supplementary material
Source: PubMed Central journal article supplement (PMC3158987)

Supporting Information for:

**Expedient Synthesis of N-Acyl Anthranilamides and  $\beta$ -Enamine Amides by the Rh(III)-Catalyzed Amidation of Aryl and Vinyl C–H Bonds with Isocyanates**

Kevin D. Hesp, Robert G. Bergman,\* and Jonathan A. Ellman\*

*Department of Chemistry, Yale University, New Haven, Connecticut, United States 06520  
Division of Chemical Sciences, Lawrence Berkeley National Laboratory, Berkeley, California,  
United States 94720*

|       |                                                                              |        |
|-------|------------------------------------------------------------------------------|--------|
| I.    | General Information                                                          | p. S2  |
| II.   | Reaction Optimization and Control Reactions                                  | p. S3  |
| III.  | Substrate Preparation                                                        | p. S4  |
| IV.   | General Procedures for the Rh-Catalyzed Addition of Isocyanates to C-H Bonds | p. S7  |
| V.    | Preparation and Characterization of Amide Products                           | p. S8  |
| VI.   | Mechanistic Studies                                                          | p. S15 |
| VII.  | References                                                                   | p. S20 |
| VIII. | $^1\text{H}$ and $^{13}\text{C}\{^1\text{H}\}$ NMR Spectra of Products       | p. S21 |

## I. General Information

Unless noted, all catalytic reactions were set up inside an inert atmosphere ( $\text{N}_2$ ) glovebox utilizing glassware that was oven-dried ( $150\text{ }^\circ\text{C}$ ) and evacuated while hot prior to use, whereas the work-up and isolation of the products from the catalytic reactions were conducted on the bench-top using standard techniques. Dichloromethane and tetrahydrofuran were passed through a column of activated alumina under nitrogen and were stored in a glovebox over activated  $4\text{ \AA}$  molecular sieves prior to use. *tert*-Butanol was deoxygenated by sparging with nitrogen gas followed by storage over activated  $4\text{ \AA}$  molecular sieves for 48 h prior to use. Chloroform- $d_1$  (Cambridge Isotopes) was used as received. Unless otherwise noted, all reagents and materials were obtained from commercial suppliers and used without further purification.  $[\text{Cp}^*\text{Rh}(\text{MeCN})_3](\text{SbF}_6)_2$ ,<sup>S1</sup> acetanilides,<sup>S2</sup> and *N*-acyl enamides<sup>S3</sup> were synthesized according to published procedures. Chromatography was performed on Merck 60 230-240 mesh silica gel.  $^1\text{H}$  and  $^{13}\text{C}\{^1\text{H}\}$  NMR characterization data were collected at 300 K on a Bruker AV-500 spectrometer operating at 500.1 and 125.8 MHz (respectively) with chemical shifts reported in parts per million relative to  $\text{CHCl}_3$  ( $^1\text{H}$  NMR; 7.26 ppm,  $^{13}\text{C}\{^1\text{H}\}$  NMR; 77.23 ppm). IR spectra were recorded on a Nicolet 6700 FTIR spectrometer and only partial data are provided. Melting points were determined on a Mel-Temp apparatus and are reported uncorrected. Mass spectra (HRMS) were obtained by the Keck Center of Yale University using a Bruker 9.4 T APEXQe FT-ICR mass spectrometer.

## II. Reaction Optimization and Control Reactions

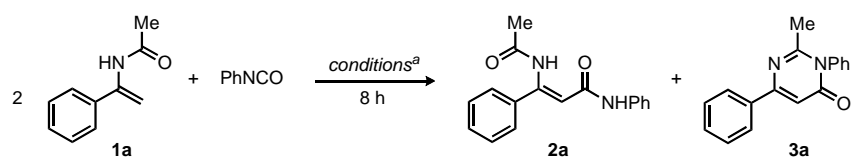

| entry | catalyst                                                                                 | solvent                         | 1a:PhNCO   | [PhNCO]<br>(mM) | temp<br>(°C) | yield <sup>b</sup> | 2a:3a <sup>b</sup> |
|-------|------------------------------------------------------------------------------------------|---------------------------------|------------|-----------------|--------------|--------------------|--------------------|
| 1     | [Cp*RhCl <sub>2</sub> ] <sub>2</sub> /2 AgSbF <sub>6</sub>                               | THF                             | 2:1        | 0.1             | 75           | 93                 | 1:8                |
| 2     | [Cp*RhCl <sub>2</sub> ] <sub>2</sub> /2 AgB(C <sub>6</sub> F <sub>5</sub> ) <sub>4</sub> | THF                             | 2:1        | 0.1             | 75           | 94                 | 1:3                |
| 3     | [Cp*Rh(MeCN) <sub>3</sub> ](SbF <sub>6</sub> ) <sub>2</sub>                              | THF                             | 2:1        | 0.1             | 75           | 94                 | 1:3                |
| 4     | [Cp*Rh(MeCN) <sub>3</sub> ](SbF <sub>6</sub> ) <sub>2</sub>                              | CH <sub>2</sub> Cl <sub>2</sub> | 2:1        | 0.1             | 75           | 85                 | 3:1                |
| 5     | [Cp*Rh(MeCN) <sub>3</sub> ](SbF <sub>6</sub> ) <sub>2</sub>                              | t-BuOH                          | 2:1        | 0.1             | 75           | 75                 | 1:8                |
| 6     | [Cp*Rh(MeCN) <sub>3</sub> ](SbF <sub>6</sub> ) <sub>2</sub>                              | toluene                         | 2:1        | 0.1             | 75           | 30                 | 1:1                |
| 7     | [Cp*Rh(MeCN) <sub>3</sub> ](SbF <sub>6</sub> ) <sub>2</sub>                              | THF                             | 1:1        | 0.1             | 75           | 75                 | 1:2                |
| 8     | [Cp*Rh(MeCN) <sub>3</sub> ](SbF <sub>6</sub> ) <sub>2</sub>                              | THF                             | 1:2        | 0.1             | 75           | 78                 | 1:2                |
| 9     | [Cp*Rh(MeCN) <sub>3</sub> ](SbF <sub>6</sub> ) <sub>2</sub>                              | THF                             | 2:1        | 0.3             | 75           | 93                 | 1:5                |
| 10    | [Cp*Rh(MeCN) <sub>3</sub> ](SbF <sub>6</sub> ) <sub>2</sub>                              | THF                             | 2:1        | 0.03            | 75           | 89                 | 1:2                |
| 11    | [Cp*Rh(MeCN) <sub>3</sub> ](SbF <sub>6</sub> ) <sub>2</sub>                              | THF                             | 2:1        | 0.1             | 55           | 94                 | 2:1                |
| 12    | <b>[Cp*Rh(MeCN)<sub>3</sub>](SbF<sub>6</sub>)<sub>2</sub></b>                            | <b>THF</b>                      | <b>2:1</b> | <b>0.1</b>      | <b>rt</b>    | <b>96</b>          | <b>15:1</b>        |
| 13    | <b>[Cp*Rh(MeCN)<sub>3</sub>](SbF<sub>6</sub>)<sub>2</sub></b>                            | <b>THF</b>                      | <b>2:1</b> | <b>0.1</b>      | <b>105</b>   | <b>99</b>          | <b>1:&gt;50</b>    |
| 14    | [Cp*RhCl <sub>2</sub> ] <sub>2</sub>                                                     | THF                             | 2:1        | 0.1             | 75           | 0                  | -                  |
| 15    | AgSbF <sub>6</sub>                                                                       | THF                             | 2:1        | 0.1             | 75           | 0                  | -                  |
| 16    | acid <sup>c</sup>                                                                        | THF                             | 2:1        | 0.1             | 75           | 0                  | -                  |
| 17    | base <sup>d</sup>                                                                        | THF                             | 2:1        | 0.1             | 75           | 0                  | -                  |
| 18    | -                                                                                        | THF                             | 2:1        | 0.1             | 75           | 0                  | -                  |

<sup>a</sup> 0.05 mmol substrate scale, 5 mol % [Rh], 8 h. <sup>b</sup> Determined by <sup>1</sup>H NMR relative to 2,6-dimethoxytoluene as an internal standard. <sup>c</sup> 20 mol % of acetic acid or trifluoroacetic acid employed. <sup>d</sup> 20 mol % of NEt<sub>3</sub>, K<sub>3</sub>PO<sub>4</sub>, or KO(t-Bu) employed.

### III. Substrate Preparation

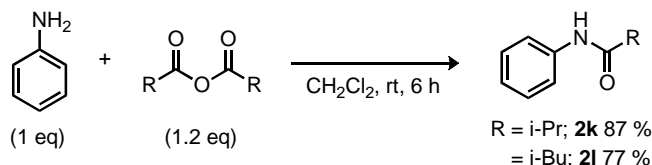

**General procedure I. Preparation of anilides.**<sup>S2</sup> To a round-bottom flask was added aniline (1 equiv) and a stir bar, and the flask was then fitted with a rubber septum. The flask was purged with nitrogen followed by the addition of anhydrous  $\text{CH}_2\text{Cl}_2$  (0.4 M aniline). The corresponding anhydride (1.2 equiv) was added, and the reaction mixture was stirred at room temperature for 6 h (or until complete by TLC). Upon completion, the reaction mixture was diluted with  $\text{CH}_2\text{Cl}_2$ , washed with sat.  $\text{NaHCO}_3$  (aq), followed by brine, and the organic layers were dried over  $\text{MgSO}_4$  followed by removal of the solvent under reduced pressure. Products were used without subsequent purification (reaction yields are unoptimized).

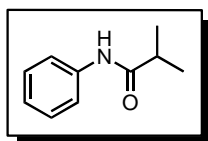

**Isobutyranilide:** General procedure I was employed using the following components: aniline (0.910 mL, 10.0 mmol) and isobutyric anhydride (2.00 mL, 12.0 mmol) in 25.0 mL of  $\text{CH}_2\text{Cl}_2$ . After work-up, the anilide was isolated in an 87% yield (1.42 g, 8.70 mmol) as a beige solid that was used without further purification. The analytical data for this compound are consistent with previously reported data.<sup>S4</sup>

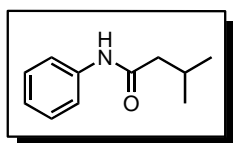

**Isovaleranilide:** General procedure I was employed using the following components: aniline (0.460 mL, 5.00 mmol) and isovaleric anhydride (1.20 mL, 6.00 mmol) in 13.0 mL of  $\text{CH}_2\text{Cl}_2$ . Following the work-up, the anilide was isolated in an 76% yield (680 mg, 3.80 mmol) as a white solid that was used without further purification (mp = 107-109 °C). IR (film): 3244, 2965, 1653, 1597, 1542, 1500  $\text{cm}^{-1}$ .  $^1\text{H}$  NMR ( $\text{CDCl}_3$ ):  $\delta$  7.52 (d,  $J$  = 7.9 Hz, 2H), 7.32 (t,  $J$  = 7.2 Hz, 2H), 7.17 (s, 1H), 7.10 (t,  $J$  = 7.2 Hz, 1H), 2.30-2.10 (m, 3H), 1.02 (d,  $J$  = 4.6 Hz, 6H);  $^{13}\text{C}\{^1\text{H}\}$  NMR ( $\text{CDCl}_3$ ):  $\delta$  171.0, 138.1, 129.2, 124.4, 120.0, 47.4, 26.5, 22.7. HRMS (ESI/[M+H]<sup>+</sup>) calcd. for  $\text{C}_{11}\text{H}_{15}\text{NO}$ : 178.12264. Found: 178.12260.

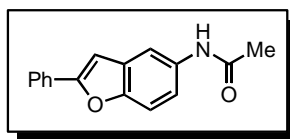

**5-*N*-Acetylamino-2-phenylbenzofuran:** General procedure I was employed using the following components: corresponding aniline (0.628 g, 3.00 mmol) and acetic anhydride (0.680 mL, 7.20 mmol) in 20.0 mL of  $\text{CH}_2\text{Cl}_2$ . Following the work-up, the anilide was isolated in an 47% yield (0.353 g, 1.40 mmol) as an off-white solid (hexanes:EtOAc (1:1),  $R_f$  = 0.26) that was used without further purification (mp = 217-219 °C). IR (film): 3255, 3072, 2918, 1651, 1601, 1566, 1471  $\text{cm}^{-1}$ .  $^1\text{H}$  NMR ( $\text{DMSO}-d_6$ ):  $\delta$  9.97 (s, 1H), 8.01 (d,  $J$  = 1.9 Hz, 1H), 7.95-7.84 (m, 2H), 7.58-7.46 (m, 3H), 7.46-7.35 (m, 3H), 3.33 (s, 3H);  $^{13}\text{C}\{^1\text{H}\}$  NMR ( $\text{DMSO}-d_6$ ):  $\delta$  168.0, 155.7, 150.5, 135.1, 129.7, 129.0, 128.8, 128.7, 124.6, 116.9, 111.0, 110.9, 102.3, 23.9. HRMS (ESI/[M+H]<sup>+</sup>) calcd. for  $\text{C}_{16}\text{H}_{13}\text{NO}_2$ : 252.1019. Found: 252.1016.

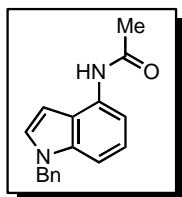

**4-N-Acetyl-1-benzylindole:** The indicated compound was prepared using the Pd-catalyzed C-N cross-coupling method described by Buchwald.<sup>S5</sup> A 4 dram scintillation vial containing a stir bar was charged with Pd<sub>2</sub>dba<sub>3</sub> (0.0382 g, 0.0420 mmol), Xantphos (0.0734 g, 0.125 mmol), Cs<sub>2</sub>CO<sub>3</sub> (0.762 g, 2.34 mmol), acetamide (0.118 g, 2.00 mmol), and 4-bromo-1-benzylindole (0.477 g, 1.67 mmol). Following addition of 4.00 mL of 1,4-dioxane, the vial was sealed and was heated in a temperature-controlled aluminum-heating block set at 100 °C for 24 h. The reaction mixture was left to cool to room temperature, diluted with CH<sub>2</sub>Cl<sub>2</sub> (5 mL), filtered through a Celite plug, and concentrated *in vacuo*. The crude material was purified by flash column chromatography on silica gel using hexanes:EtOAc (1:1; R<sub>f</sub> = 0.27) in a 57% isolated yield (0.250 mg, 0.95 mmol) as a white solid (mp: 155-157 °C). IR (film): 3245, 3043, 1647, 1619, 1578, 1539, 1512 cm<sup>-1</sup>. <sup>1</sup>H NMR (CDCl<sub>3</sub>): δ 7.75 (d, *J* = 7.6 Hz, 1H), 7.59 (s, 1H), 7.38-7.20 (m, 3H), 7.19-7.05 (m, 5H), 6.51 (d, *J* = 3.0 Hz, 1H), 5.30 (s, 2H), 2.25 (s, 3H); <sup>13</sup>C{<sup>1</sup>H} NMR (CDCl<sub>3</sub>): δ 168.6, 137.4, 137.3, 130.3, 129.0, 128.0, 127.9, 127.0, 122.6, 121.0, 111.9, 106.7, 97.9, 50.4, 24.7. HRMS (ESI/[M+H]<sup>+</sup>) calcd. for C<sub>17</sub>H<sub>16</sub>N<sub>2</sub>O: 265.1335. Found: 265.1333.

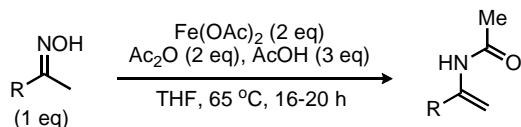

**General procedure II. Preparation of *N*-acyl enamides.**<sup>S3a</sup> To a round-bottom flask was added ketoxime (1 equiv; prepared by condensation of H<sub>2</sub>NOH with the respective ketone), Fe(OAc)<sub>2</sub> (2 equiv), and a stir bar, and the flask was then fitted with a rubber septum. The flask was purged with nitrogen followed by the addition of anhydrous THF (0.2 M ketoxime), acetic anhydride (2 equiv), and acetic acid (3 equiv). The reaction mixture was stirred at 65 °C for 15-20 h. Upon completion, the reaction was quenched with sat. NaHCO<sub>3</sub> (aq), and the combined organic extracts were washed with brine and dried over MgSO<sub>4</sub> followed by removal of the solvent under reduced pressure. *N*-Acetyl enamides were purified by flash column chromatography (reaction yields are unoptimized).

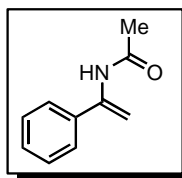

**2a.** General procedure II was employed using the following components: ketoxime (0.270 g, 2.00 mmol), acetic anhydride (0.380 mL, 4.00 mmol), acetic acid (0.340 mL, 6.00 mmol), and Fe(OAc)<sub>2</sub> (0.696 g, 4.00 mmol) in 10.0 mL of THF. Following the work-up, the enamide was isolated by flash column chromatography (hexanes:EtOAc = 2:1) in an 80% yield (0.258 g, 1.60 mmol) as a beige solid. The analytical data for this compound are consistent with previously reported data.<sup>S3</sup>

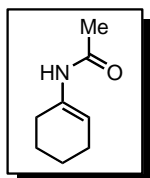

**2b.** General procedure II was employed using the following components: ketoxime (0.566 g, 5.00 mmol), acetic anhydride (0.950 mL, 10.0 mmol), acetic acid (0.860 mL, 15.0 mmol), and Fe(OAc)<sub>2</sub> (1.74 g, 10.0 mmol) in 25.0 mL of THF. Following the work-up, the enamide was isolated by flash column chromatography (hexanes:EtOAc = 2:1) in a 34% yield (0.240 g, 1.72 mmol) as a yellow solid. The analytical data for this compound are consistent with previously reported data.<sup>S3b</sup>

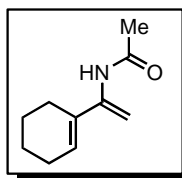

**2c.** General procedure II was employed using the following components: ketoxime (0.696 g, 5.00 mmol), acetic anhydride (0.950 mL, 10.0 mmol), acetic acid (0.860 mL, 15.0 mmol), and Fe(OAc)<sub>2</sub> (1.74 g, 10.0 mmol) in 25.0 mL of THF. Following the work-up, the enamide was isolated by flash column chromatography (hexanes:EtOAc = 2:1) in a 40% yield (0.328 g, 2.00 mmol) as a waxy yellow solid. The analytical data for this compound are consistent with previously reported data.<sup>S6</sup>

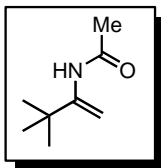

**2d.** General procedure II was employed using the following components: ketoxime (0.576 g, 5.00 mmol), acetic anhydride (0.950 mL, 10.0 mmol), acetic acid (0.860 mL, 15.0 mmol), and Fe(OAc)<sub>2</sub> (1.74 g, 10.0 mmol) in 25.0 mL of THF. Following the work-up, the enamide was isolated by flash column chromatography (hexanes:EtOAc = 2:1) in a 39% yield (0.276 g, 1.95 mmol) as a white solid. The analytical data for this compound are consistent with previously reported data.<sup>S7</sup>

#### IV. General Procedures for the Rh-Catalyzed Addition of Isocyanates to C-H Bonds

**General procedure I. Rh-catalyzed coupling of 2-phenylpyridine with isocyanates (Equation 1).** In a N<sub>2</sub>-filled glovebox, [Cp\*RhCl<sub>2</sub>]<sub>2</sub> (7.70 mg, 0.0125 mmol), AgSbF<sub>6</sub> (17.2 mg, 0.0500 mmol), 2-phenylpyridine (0.500 mmol) and the corresponding isocyanate (0.250 mmol) were added to a screw-capped vial followed by addition of a stir bar and CH<sub>2</sub>Cl<sub>2</sub> (2.00 mL, [isocyanate] = 0.125 mM). The vial was sealed with a cap containing a PTFE septum and was removed from the glovebox. The reaction vial was then placed in a temperature-controlled aluminum-heating block set at 75 °C. After 24 h of stirring, the vial was removed from the heating block and was left to cool to ambient temperature. After filtration through a pad of silica and removal of the solvent, the residue was purified by column chromatography on silica gel.

**General procedure II. Rh-catalyzed coupling of acetanilides or enamides with isocyanates (Table 2 and Equations 2-3).** In a N<sub>2</sub>-filled glovebox, [Cp\*Rh(MeCN)<sub>3</sub>](SbF<sub>6</sub>)<sub>2</sub> (10.4 mg, 0.0125 mmol), the acetanilide or enamide (0.500 mmol) and the corresponding isocyanate (0.250 mmol) were added to a screw-capped vial followed by addition of a stir bar and THF (1.00 mL, [isocyanate] = 0.250 mM). The vial was sealed with a cap containing a PTFE septum and was removed from the glovebox. The reaction vial was then placed in a temperature-controlled aluminum-heating block set at the indicated temperature. After 16 h of stirring, the vial was removed from the heating block and was left to cool to ambient temperature. After filtration through a pad of silica and removal of the solvent, the residue was purified by column chromatography on silica gel.

## V. Preparation and Characterization of Amide Products

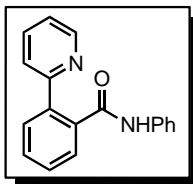

**Equation 1, 1a.** Following general procedure I, the indicated compound was purified by flash column chromatography on silica gel using hexanes:EtOAc (2:1;  $R_f = 0.11$ ) in a 85% isolated yield (58 mg, 0.21 mmol) as a waxy white solid. IR (film): 3288, 3056, 1653, 1597, 1587, 1532  $\text{cm}^{-1}$ .  $^1\text{H}$  NMR ( $\text{CDCl}_3$ ):  $\delta$  8.80-8.59 (m, 2H), 7.83 (d,  $J = 7.4$  Hz, 1H), 7.76 (t,  $J = 7.7$  Hz, 1H), 7.60-7.42 (m, 6H), 7.36-7.24 (m, 3H), 7.09 (t,  $J = 7.3$  Hz, 1H);  $^{13}\text{C}\{^1\text{H}\}$  NMR ( $\text{CDCl}_3$ ):  $\delta$  167.7, 158.7, 149.0, 138.5, 138.4, 137.2, 136.5, 130.6, 130.5, 129.6, 129.1, 129.0, 124.5, 124.4, 122.8, 120.1. HRMS (ESI/[ $\text{M}+\text{H}$ ] $^+$ ) calcd. for  $\text{C}_{18}\text{H}_{14}\text{N}_2\text{O}$ : 275.1179. Found: 275.1171.

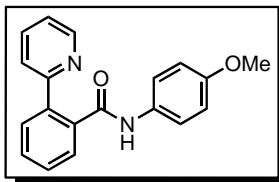

**Equation 1, 1b.** Following general procedure I, the indicated compound was purified by flash column chromatography on silica gel using hexanes:EtOAc (2:1;  $R_f = 0.10$ ) in a 72% isolated yield (56 mg, 0.18 mmol) as a waxy off-white solid. IR (film): 3283, 3054, 1649, 1598, 1587  $\text{cm}^{-1}$ .  $^1\text{H}$  NMR ( $\text{CDCl}_3$ ):  $\delta$  8.68-8.62 (m, 1H), 8.45 (s, 1H), 7.81 (d,  $J = 7.0$  Hz, 1H), 7.75 (dt,  $J = 7.5$  Hz, 1H), 7.58-7.46 (m, 4H), 7.36-7.30 (m, 2H), 7.29-7.23 (m, 1H), 6.84-6.78 (m, 2H), 3.81 (s, 3H);  $^{13}\text{C}\{^1\text{H}\}$  NMR ( $\text{CDCl}_3$ ):  $\delta$  167.6, 158.7, 156.6, 149.1, 138.5, 137.2, 136.5, 131.5, 130.5, 130.4, 129.5, 129.0, 124.5, 122.8, 121.8, 114.3, 55.7. HRMS (ESI/[ $\text{M}+\text{H}$ ] $^+$ ) calcd. for  $\text{C}_{19}\text{H}_{16}\text{N}_2\text{O}_2$ : 305.1285. Found: 305.1272.

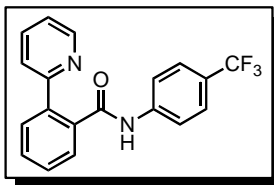

**Equation 1, 1c.** Following general procedure I, the indicated compound was purified by flash column chromatography on silica gel using hexanes:EtOAc (2:1;  $R_f = 0.13$ ) in a 84% isolated yield (73 mg, 0.21 mmol) as an off-white solid (mp: 183-185  $^{\circ}\text{C}$ ). IR (film): 3240, 2921, 1677, 1604, 1594, 1539  $\text{cm}^{-1}$ .  $^1\text{H}$  NMR ( $\text{CDCl}_3$ ):  $\delta$  9.59 (s, 1H), 8.62 (d,  $J = 4.0$  Hz, 1H), 7.84-7.70 (m, 2H), 7.58 (d,  $J = 8.0$  Hz, 2H), 7.54-7.39 (m, 6H), 7.33-7.27 (m, 1H);  $^{13}\text{C}\{^1\text{H}\}$  NMR ( $\text{CDCl}_3$ ):  $\delta$  168.0, 158.7, 148.7, 141.7, 138.5, 137.6, 135.9, 130.9, 130.7, 129.7, 129.0, 126.3 (q,  $J = 3.8$  Hz), 126.0 (q,  $J = 32.5$  Hz), 124.6, 124.3 (q,  $J = 270.0$  Hz), 123.0, 119.6. HRMS (ESI/[ $\text{M}+\text{H}$ ] $^+$ ) calcd. for  $\text{C}_{19}\text{H}_{13}\text{F}_3\text{N}_2\text{O}$ : 343.1053. Found: 343.1035.

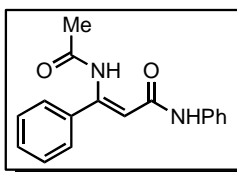

**Table 2, 3a.** General procedure II was followed and the reaction was conducted at room temperature. The indicated compound was purified by flash column chromatography on silica gel using hexanes:EtOAc (2:1;  $R_f = 0.30$ ) in a 96% isolated yield (68 mg, 0.24 mmol) as a pale yellow solid (mp: 162-164  $^{\circ}\text{C}$ ). IR (film): 3317, 2059, 1695, 1624, 1596, 1576  $\text{cm}^{-1}$ .  $^1\text{H}$  NMR ( $\text{CDCl}_3$ ):  $\delta$  11.47 (s, 1H), 7.54-7.43 (m, 2H), 7.42-7.28 (m, 8H), 7.21-7.09 (m, 1H), 5.17 (s, 1H), 2.17 (s, 3H);  $^{13}\text{C}\{^1\text{H}\}$  NMR ( $\text{CDCl}_3$ ):  $\delta$  168.9, 166.4, 153.2, 137.7, 136.5, 129.5, 129.3, 128.2, 127.2, 124.8, 120.5, 103.8, 25.1. HRMS (ESI/[ $\text{M}+\text{H}$ ] $^+$ ) calcd. for  $\text{C}_{17}\text{H}_{16}\text{N}_2\text{O}_2$ : 281.1285. Found: 281.1271.

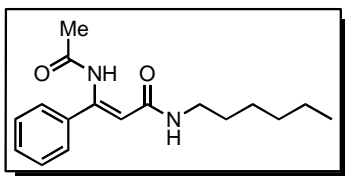

**Table 2, 3b.** General procedure II was followed and the reaction was conducted at room temperature. The indicated compound was purified by flash column chromatography on silica gel using hexanes:EtOAc (2:1;  $R_f$  = 0.17) in a 96% isolated yield (70 mg, 0.24 mmol) as a colorless oil. IR (film): 3321, 2929, 2858, 1698, 1627, 1577, 1552  $\text{cm}^{-1}$ .

$^1\text{H}$  NMR ( $\text{CDCl}_3$ ):  $\delta$  11.57 (s, 1H), 7.39-7.28 (m, 5H), 5.68 (s, 1H), 5.01 (s, 1H), 3.38-3.17 (m, 2H), 2.13 (s, 3H), 1.61-1.42 (m, 2H), 1.41-1.20 (m, 6H), 0.98-0.81 (m, 3H);  $^{13}\text{C}\{^1\text{H}\}$  NMR ( $\text{CDCl}_3$ ):  $\delta$  168.8, 168.1, 151.5, 136.7, 129.1, 128.1, 127.1, 103.7, 39.6, 31.7, 29.7, 26.8, 25.0, 22.7, 14.2. HRMS (ESI/[ $\text{M}+\text{H}$ ] $^+$ ) calcd. for  $\text{C}_{17}\text{H}_{24}\text{N}_2\text{O}_2$ : 289.1911. Found: 289.1904.

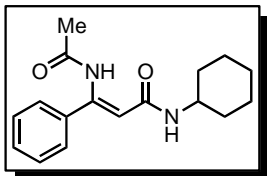

**Table 2, 3c.** General procedure II was followed and the reaction was conducted at room temperature. The indicated compound was purified by flash column chromatography on silica gel using hexanes:EtOAc (2:1;  $R_f$  = 0.18) in a 84% isolated yield (59 mg, 0.21 mmol) as a waxy off-white solid. IR (film): 3310, 2930, 2854, 1696, 1623, 1576, 1546  $\text{cm}^{-1}$ .  $^1\text{H}$  NMR ( $\text{CDCl}_3$ ):

$\delta$  11.58 (s, 1H), 7.40-7.29 (m, 5H), 5.40 (d,  $J$  = 6.4 Hz, 1H), 5.00 (s, 1H), 3.88-3.74 (m, 1H), 2.14 (s, 3H), 2.01-1.90 (m, 2H), 1.79-1.69 (m, 2H), 1.68-1.60 (m, 1H), 1.47-1.32 (m, 2H), 1.24-1.09 (m, 3H);  $^{13}\text{C}\{^1\text{H}\}$  NMR ( $\text{CDCl}_3$ ):  $\delta$  168.7, 167.3, 151.8, 136.8, 129.2, 128.1, 127.1, 103.7, 48.4, 33.4, 25.7, 25.1, 25.0. HRMS (ESI/[ $\text{M}+\text{H}$ ] $^+$ ) calcd. for  $\text{C}_{17}\text{H}_{22}\text{N}_2\text{O}_2$ : 287.1754. Found: 287.1747.

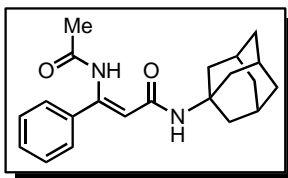

**Table 2, 3d.** General procedure II was followed and the reaction was conducted at room temperature. The indicated compound was purified by flash column chromatography on silica gel using hexanes:EtOAc (2:1;  $R_f$  = 0.36) in a 40% isolated yield (34 mg, 0.10 mmol) as a white solid (mp: 185-187  $^{\circ}\text{C}$ ). IR (film): 3326, 2905, 2850, 1696, 1624, 1576, 1544  $\text{cm}^{-1}$ .  $^1\text{H}$  NMR ( $\text{CDCl}_3$ ):  $\delta$  11.49 (s, 1H), 7.42-7.28 (m, 5H), 5.19 (s, 1H), 4.94 (s,

1H), 2.14 (s, 3H), 2.15-2.08 (m, 3H), 2.07-1.98 (m, 6H), 1.79-1.64 (m, 6H);  $^{13}\text{C}\{^1\text{H}\}$  NMR ( $\text{CDCl}_3$ ):  $\delta$  168.7, 167.7, 151.3, 137.0, 129.0, 128.1, 127.1, 104.8, 52.5, 42.0, 36.5, 29.6, 25.1. HRMS (ESI/[ $\text{M}+\text{H}$ ] $^+$ ) calcd. for  $\text{C}_{21}\text{H}_{26}\text{N}_2\text{O}_2$ : 339.2067. Found: 339.2059.

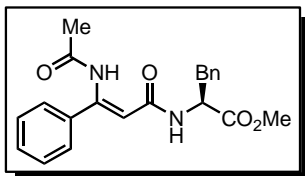

**Table 2, 3e.** General procedure II was followed and the reaction was conducted at room temperature. The indicated compound was purified by flash column chromatography on silica gel using hexanes:EtOAc (2:1;  $R_f$  = 0.12) in a 65% isolated yield (59 mg, 0.16 mmol) as a waxy pale yellow solid. IR (film): 3308, 3058, 1741, 1711, 1622, 1577, 1538  $\text{cm}^{-1}$ .  $^1\text{H}$  NMR

( $\text{CDCl}_3$ ):  $\delta$  11.60 (s, 1H), 7.62-7.46 (m, 8H), 7.39-7.31 (m, 2H), 6.17 (d,  $J$  = 7.4 Hz, 1H), 5.30 (s, 1H), 5.16 (m, 1H), 4.00 (s, 3H), 3.41 (m, 2H), 2.38 (s, 3H);  $^{13}\text{C}\{^1\text{H}\}$  NMR ( $\text{CDCl}_3$ ):  $\delta$  172.1, 168.7, 167.6, 152.9, 136.5, 135.8, 129.4 (x 2), 128.9, 128.2, 127.5, 127.2, 102.6, 53.2, 52.7, 38.1, 25.0. HRMS (ESI/[ $\text{M}+\text{H}$ ] $^+$ ) calcd. for  $\text{C}_{21}\text{H}_{22}\text{N}_2\text{O}_4$ : 367.1652. Found: 367.1635.

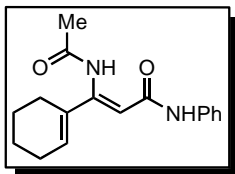

**Table 2, 3f.** General procedure II was followed and the reaction was conducted at room temperature. The indicated compound was purified by flash column chromatography on silica gel using hexanes:EtOAc (5:1;  $R_f$  = 0.16) in a 80% isolated yield (58 mg, 0.20 mmol) as a white solid (mp: 141-143 °C). IR (film): 3314, 2936, 1694, 1614, 1595, 1546  $\text{cm}^{-1}$ .  $^1\text{H}$  NMR ( $\text{CDCl}_3$ ):  $\delta$  11.38 (s, 1H), 7.55-7.41 (m, 2H), 7.39-7.28 (m, 3H), 7.12 (t,  $J$  = 7.2 Hz, 1H), 5.84 (s, 1H), 5.03 (s, 1H), 2.19-2.04 (m, 7H), 1.74-1.56 (m, 4H);  $^{13}\text{C}\{^1\text{H}\}$  NMR ( $\text{CDCl}_3$ ):  $\delta$  168.5, 167.42, 156.0, 137.8, 137.1, 129.3, 127.4, 124.7, 120.4, 100.0, 27.6, 25.6, 25.0, 22.5, 22.1. HRMS ( $\text{ESI}/[\text{M}+\text{H}]^+$ ) calcd. for  $\text{C}_{17}\text{H}_{20}\text{N}_2\text{O}_2$ : 285.1598. Found: 285.1586.

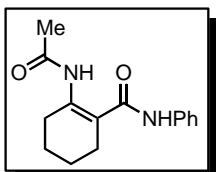

**Table 2, 3g.** General procedure II was followed and the reaction was conducted at room temperature. The indicated compound was purified by flash column chromatography on silica gel using hexanes:EtOAc (2:1;  $R_f$  = 0.29) in a 76% isolated yield (50 mg, 0.19 mmol) as a white solid (mp: 190-192 °C). IR (film): 3289, 2943, 1674, 1641, 1594, 1541, 1521  $\text{cm}^{-1}$ .  $^1\text{H}$  NMR ( $\text{CDCl}_3$ ):  $\delta$  12.46 (s, 1H), 7.46 (d,  $J$  = 8.4 Hz, 2H), 7.41-7.29 (m, 3H), 7.15 (t,  $J$  = 6.9 Hz, 1H), 3.11-2.94 (m, 2H), 2.49-2.34 (m, 2H), 2.11 (s, 3H), 1.81-1.62 (m, 4H);  $^{13}\text{C}\{^1\text{H}\}$  NMR ( $\text{CDCl}_3$ ):  $\delta$  169.3, 168.8, 151.6, 137.5, 129.3, 125.1, 121.6, 104.3, 28.8, 25.9, 25.3, 22.1, 21.9. HRMS ( $\text{ESI}/[\text{M}+\text{H}]^+$ ) calcd. for  $\text{C}_{15}\text{H}_{18}\text{N}_2\text{O}_2$ : 259.1441. Found: 259.1439.

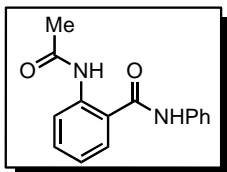

**Table 2, 3h.** General procedure II was followed and the reaction was conducted at 75 °C. The indicated compound was purified by flash column chromatography on silica gel using hexanes:EtOAc (2:1;  $R_f$  = 0.27) in a 60% isolated yield (38 mg, 0.15 mmol) as a white solid (mp: 179-181 °C). IR (film): 3294, 3030, 1674, 1650, 1596, 1583  $\text{cm}^{-1}$ .  $^1\text{H}$  NMR ( $\text{CDCl}_3$ ):  $\delta$  10.63 (s, 1H), 8.47 (d,  $J$  = 8.3 Hz, 1H), 8.28 (s, 1H), 7.63 (dd,  $J$  = 8.5, 0.9 Hz, 2H), 7.56 (dd,  $J$  = 7.8, 1.4 Hz, 1H), 7.46-7.38 (m, 3H), 7.24-7.19 (m, 1H), 7.09 (td,  $J$  = 7.7, 1.1 Hz, 1H), 2.18 (s, 3H);  $^{13}\text{C}\{^1\text{H}\}$  NMR ( $\text{CDCl}_3$ ):  $\delta$  169.5, 167.6, 139.4, 137.6, 132.9, 129.5, 127.0, 125.4, 123.1, 122.1, 121.5, 121.0, 25.5. HRMS ( $\text{ESI}/[\text{M}+\text{H}]^+$ ) calcd. for  $\text{C}_{15}\text{H}_{14}\text{N}_2\text{O}_2$ : 255.1128. Found: 255.1122.

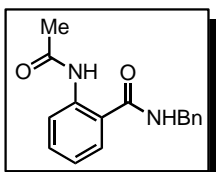

**Table 2, 3i.** General procedure II was followed and the reaction was conducted at 75 °C. The indicated compound was purified by flash column chromatography on silica gel using hexanes:EtOAc (2:1;  $R_f$  = 0.23) in a 68% isolated yield (46 mg, 0.17 mmol) as a white solid (mp: 146-148 °C). IR (film): 3235, 3031, 1660, 1630, 1602, 1538  $\text{cm}^{-1}$ .  $^1\text{H}$  NMR ( $\text{CDCl}_3$ ):  $\delta$  11.05 (s, 1H), 8.58 (d,  $J$  = 8.3 Hz, 1H), 7.50-7.42 (m, 2H), 7.41- 7.30 (m, 5H), 7.04 (m, 1H), 6.60 (s, 1H), 4.62 (d,  $J$  = 5.6 Hz, 2H), 2.20 (s, 3H);  $^{13}\text{C}\{^1\text{H}\}$  NMR ( $\text{CDCl}_3$ ):  $\delta$  169.3, 169.1, 139.9, 137.7, 132.9, 129.1, 128.1, 128.0, 126.6, 122.9, 121.8, 120.3, 44.3, 25.5. HRMS ( $\text{ESI}/[\text{M}+\text{H}]^+$ ) calcd. for  $\text{C}_{16}\text{H}_{16}\text{N}_2\text{O}_2$ : 269.1285. Found: 269.1284.

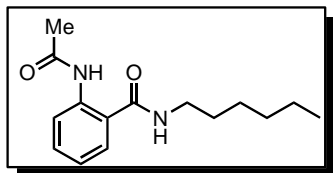

**Table 2, 3j.** General procedure II was followed and the reaction was conducted at 75 °C. The indicated compound was purified by flash column chromatography on silica gel using hexanes:EtOAc (2:1;  $R_f$  = 0.30) in a 76% isolated yield (50 mg, 0.19 mmol) as a white solid (mp: 118-120 °C). IR (film): 3243, 2956, 2927, 2857, 1660, 1630, 1601, 1519  $\text{cm}^{-1}$ .  $^1\text{H}$  NMR ( $\text{CDCl}_3$ ):  $\delta$  11.03 (s, 1H), 8.56 (d,  $J$  = 8.3 Hz, 1H), 7.49-7.38 (m, 2H), 7.05 (t,  $J$  = 7.6 Hz, 1H), 6.27 (s, 1H), 3.43 (m, 2H), 2.19 (s, 3H), 1.67-1.58 (m, 2H), 1.44-1.27 (m, 6H), 0.90 (m, 3H);  $^{13}\text{C}\{^1\text{H}\}$  NMR ( $\text{CDCl}_3$ ):  $\delta$  169.3, 169.2, 139.7, 132.7, 126.5, 122.9, 121.7, 120.8, 40.3, 31.7, 29.7, 26.9, 25.5, 22.8, 14.2. HRMS (ESI/ $[\text{M}+\text{H}]^+$ ) calcd. for  $\text{C}_{15}\text{H}_{22}\text{N}_2\text{O}_2$ : 263.1573. Found: 263.1747.

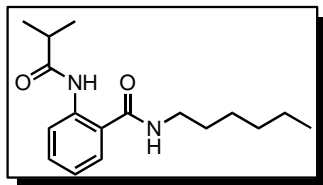

**Table 2, 3k.** General procedure II was followed and the reaction was conducted at 120 °C for 24 h. The indicated compound was observed in a 77%  $^1\text{H}$  NMR yield relative to 2,6-dimethoxytoluene as an internal standard, and a pure fraction for characterization purposes (28 mg, 0.095 mmol) was obtained by flash column chromatography on silica gel using  $\text{CH}_2\text{Cl}_2$ :1%  $\text{NH}_4\text{OH}$  in MeOH (100:1;  $R_f$  = 0.05) as a colorless oil. IR (film): 3320, 2961, 2930, 1678, 1638, 1599, 1586  $\text{cm}^{-1}$ .  $^1\text{H}$  NMR ( $\text{CDCl}_3$ ):  $\delta$  11.11 (s, 1H), 8.61 (d,  $J$  = 7.9 Hz, 1H), 7.50-7.39 (m, 2H), 7.04 (dt,  $J$  = 7.9, 1.2 Hz, 1H), 6.28 (s, 1H), 3.49-3.36 (m, 2H), 2.58 (sept,  $J$  = 6.9 Hz, 1H), 1.70-1.56 (m, 2H), 1.50-1.29 (m, 6H), 1.26 (d,  $J$  = 6.9 Hz, 6H), 0.97-0.84 (m, 3H);  $^{13}\text{C}\{^1\text{H}\}$  NMR ( $\text{CDCl}_3$ ):  $\delta$  176.3, 169.3, 140.0, 132.7, 126.5, 122.7, 121.8, 120.9, 40.3, 37.5, 31.8, 29.7, 26.9, 22.8, 19.8, 14.2. HRMS (ESI/ $[\text{M}+\text{H}]^+$ ) calcd. for  $\text{C}_{17}\text{H}_{26}\text{N}_2\text{O}_2$ : 291.2067. Found: 291.2063.

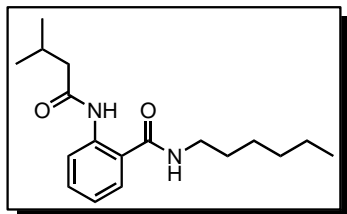

**Table 2, 3l.** General procedure II was followed and the reaction was conducted at 120 °C for 24 h. The indicated compound was observed in 72%  $^1\text{H}$  NMR yield relative to 2,6-dimethoxytoluene as an internal standard, and a pure fraction for characterization purposes (24 mg, 0.079 mmol) was obtained by flash column chromatography on silica gel using 30% Et<sub>2</sub>O in hexanes ( $R_f$  = 0.11) as a white solid (mp: 121-123 °C). IR (film): 3284, 2957, 2927, 1653, 1627, 1601, 1534  $\text{cm}^{-1}$ .  $^1\text{H}$  NMR ( $\text{CDCl}_3$ ):  $\delta$  11.01 (s, 1H), 8.60 (d,  $J$  = 7.8 Hz, 1H), 7.54-7.35 (m, 2H), 7.04 (dt,  $J$  = 7.9, 1.2 Hz, 1H), 6.29 (s, 1H), 3.51-3.35 (m, 2H), 2.31-2.13 (m, 3H), 1.68-1.54 (m, 2H), 1.49-1.24 (m, 6H), 1.00 (d,  $J$  = 6.4 Hz, 6H), 0.90 (m, 3H);  $^{13}\text{C}\{^1\text{H}\}$  NMR ( $\text{CDCl}_3$ ):  $\delta$  171.8, 169.2, 139.8, 132.6, 126.5, 122.8, 121.8, 120.8, 48.1, 40.3, 31.7, 29.7, 26.9, 26.5, 22.8, 22.7, 14.2. HRMS (ESI/ $[\text{M}+\text{H}]^+$ ) calcd. for  $\text{C}_{18}\text{H}_{28}\text{N}_2\text{O}_2$ : 305.2223. Found: 305.2213.

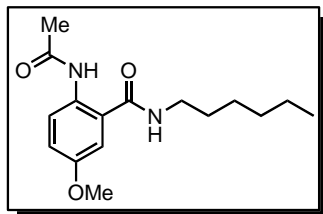

**Table 2, 3m.** General procedure II was followed and the reaction was conducted at 75 °C. The indicated compound was purified by flash column chromatography on silica gel using hexanes:EtOAc (2:1;  $R_f$  = 0.14) in a 60% isolated yield (44 mg, 0.15 mmol) as a yellow solid (mp: 96-98 °C). IR (film): 3307, 2929, 2857, 1668, 1643, 1597, 1511  $\text{cm}^{-1}$ .  $^1\text{H}$  NMR ( $\text{CDCl}_3$ ):  $\delta$  10.53 (s, 1H), 8.39 (d,  $J$  = 9.1 Hz, 1H), 6.98 (dd,  $J$  = 9.2, 1.8 Hz, 1H), 6.94 (s, 1H), 6.33 (s, 1H), 3.80 (s, 3H), 3.49-3.30 (m, 2H), 2.15 (s, 3H), 1.67-1.57 (m, 2H), 1.45-1.26 (m, 6H), 0.97-0.80 (m, 3H);  $^{13}\text{C}\{^1\text{H}\}$  NMR ( $\text{CDCl}_3$ ):  $\delta$  168.9, 168.8, 155.0, 132.6, 123.5, 122.9, 116.7, 112.8, 55.9, 40.3, 31.7, 29.6, 26.9, 25.2, 22.8, 14.2. HRMS (ESI/ $[\text{M}+\text{H}]^+$ ) calcd. for  $\text{C}_{16}\text{H}_{24}\text{N}_2\text{O}_3$ : 293.1860. Found: 293.1856.

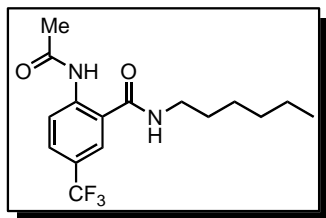

**Table 2, 3n.** General procedure II was followed and the reaction was conducted at 75 °C. The indicated compound was purified by flash column chromatography on silica gel using hexanes:EtOAc (2:1;  $R_f$  = 0.53) in a 44% isolated yield (35 mg, 0.11 mmol) as a yellow solid (mp: 84-86 °C). IR (film): 3315, 2930, 2859, 1685, 1646, 1594, 1518  $\text{cm}^{-1}$ .  $^1\text{H}$  NMR ( $\text{CDCl}_3$ ):  $\delta$  11.19 (s, 1H), 8.73 (d,  $J$  = 8.5 Hz, 1H), 7.73-7.60 (m, 2H), 6.41 (s, 1H), 3.50-3.36 (m, 2H), 2.21 (s, 3H), 1.73-1.57 (m, 2H), 1.43-1.27 (m, 6H), 0.96-0.83 (m, 3H);  $^{13}\text{C}\{^1\text{H}\}$  NMR ( $\text{CDCl}_3$ ):  $\delta$  169.6, 168.1, 142.7, 129.4 (q,  $J$  = 3.8 Hz), 124.6 (q,  $J$  = 33.9 Hz), 123.9 (q,  $J$  = 271.5 Hz), 123.7 (q,  $J$  = 3.8 Hz), 121.7, 120.5, 40.5, 31.7, 29.6, 26.9, 25.5, 22.8, 14.2. HRMS (ESI/[M+H] $^+$ ) calcd. for  $\text{C}_{16}\text{H}_{21}\text{N}_2\text{O}_2$ : 331.1628. Found: 331.1617.

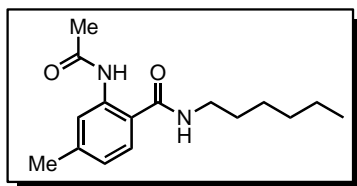

**Table 2, 3o.** General procedure II was followed and the reaction was conducted at 75 °C. The indicated compound was purified by flash column chromatography on silica gel using hexanes:EtOAc (2:1;  $R_f$  = 0.31) to provide the product in a 97% isolated yield (67 mg, 0.24 mmol) as a white solid (mp: 83-85 °C). IR (film): 3320, 2928, 2858, 1676, 1637, 1607, 1579, 1522  $\text{cm}^{-1}$ .  $^1\text{H}$  NMR ( $\text{CDCl}_3$ ):  $\delta$  11.16 (s, 1H), 8.35 (s, 1H), 7.31 (d,  $J$  = 8.0 Hz, 1H), 6.80 (d,  $J$  = 7.9 Hz, 1H), 6.58 (s, 1H), 3.44-3.31 (m, 2H), 2.32 (s, 3H), 2.13 (s, 3H), 1.65-1.54 (m, 2H), 1.42-1.21 (m, 6H), 0.90-0.82 (m, 3H);  $^{13}\text{C}\{^1\text{H}\}$  NMR ( $\text{CDCl}_3$ ):  $\delta$  169.3, 169.2, 143.2, 139.6, 126.6, 121.9, 121.8, 117.8, 40.2, 31.6, 29.6, 26.8, 25.5, 22.7, 21.9, 14.1. HRMS (ESI/[M+H] $^+$ ) calcd. for  $\text{C}_{16}\text{H}_{24}\text{N}_2\text{O}_2$ : 277.1911. Found: 277.1901.

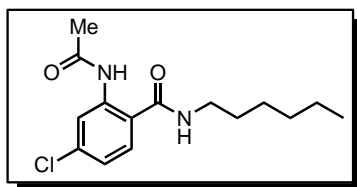

**Table 2, 3p.** General procedure II was followed and the reaction was conducted at 75 °C. The indicated compound was purified by flash column chromatography on silica gel using hexanes:EtOAc (2:1;  $R_f$  = 0.44) to provide the product in a 68% isolated yield (50 mg, 0.17 mmol) as a white solid (mp: 74-76 °C). IR (film): 3318, 2930, 2859, 1679, 1641, 1592, 1577, 1508  $\text{cm}^{-1}$ .  $^1\text{H}$  NMR ( $\text{CDCl}_3$ ):  $\delta$  11.14 (s, 1H), 8.59 (s, 1H), 7.33 (d,  $J$  = 8.4 Hz, 1H), 6.98 (dd,  $J$  = 8.4, 2.1 Hz, 1H), 6.51 (s, 1H), 3.44-3.34 (m, 2H), 2.16 (s, 3H), 1.66-1.57 (m, 2H), 1.43-1.26 (m, 6H), 0.92-0.84 (m, 3H);  $^{13}\text{C}\{^1\text{H}\}$  NMR ( $\text{CDCl}_3$ ):  $\delta$  169.4, 168.4, 140.6, 138.5, 127.8, 122.8, 121.3, 118.8, 40.4, 31.6, 29.5, 26.9, 25.5, 22.7, 14.2. HRMS (ESI/[M+H] $^+$ ) calcd. for  $\text{C}_{15}\text{H}_{21}\text{ClN}_2\text{O}_2$ : 297.1364. Found: 297.1359.

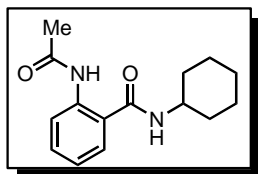

**Table 2, 3q.** General procedure II was followed and the reaction was conducted at 75 °C. The indicated compound was purified by flash column chromatography on silica gel using hexanes:EtOAc (2:1;  $R_f$  = 0.24) in a 76% isolated yield (49 mg, 0.19 mmol) as a white solid (mp: 168-170 °C). IR (film): 3287, 2931, 2850, 1688, 1625, 1586, 1518  $\text{cm}^{-1}$ .  $^1\text{H}$  NMR ( $\text{CDCl}_3$ ):  $\delta$  11.04 (s, 1H), 8.57 (d,  $J$  = 8.3 Hz, 1H), 7.52-7.37 (m, 2H), 7.06 (t,  $J$  = 7.6 Hz, 1H), 6.08 (s, 1H), 4.00-3.86 (m, 1H), 2.19 (s, 3H), 2.09-1.98 (m, 2H), 1.83-1.73 (m, 2H), 1.67 (m, 1H), 1.52-1.38 (m, 2H), 1.33-1.17 (m, 3H);  $^{13}\text{C}\{^1\text{H}\}$  NMR ( $\text{CDCl}_3$ ):  $\delta$  169.2, 168.4, 139.8, 132.7, 126.5, 122.8, 121.7, 120.9, 49.1, 33.3, 25.7, 25.5, 25.1. HRMS (ESI/[M+H] $^+$ ) calcd. for  $\text{C}_{15}\text{H}_{20}\text{N}_2\text{O}_2$ : 261.1598. Found: 261.1590.

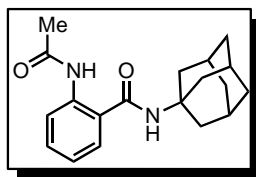

**Table 2, 3r.** General procedure II was followed and the reaction was conducted at 75 °C. The indicated compound was purified by flash column chromatography on silica gel using hexanes:EtOAc (2:1;  $R_f$  = 0.38) in a 48% isolated yield (36 mg, 0.12 mmol) as a white solid (mp: 177-179 °C). IR (film): 3321, 2906, 2851, 1670, 1640, 1586, 1520  $\text{cm}^{-1}$ .  $^1\text{H}$  NMR ( $\text{CDCl}_3$ ):  $\delta$  10.88 (s, 1H), 8.52 (d,  $J$  = 8.3 Hz, 1H), 7.49-7.33 (m, 2H), 7.03 (t,  $J$  = 7.6 Hz, 1H), 5.90 (s, 1H), 2.18 (s, 3H), 2.16-2.07 (m, 9H), 1.79-1.68 (m, 6H);  $^{13}\text{C}\{^1\text{H}\}$  NMR ( $\text{CDCl}_3$ ):  $\delta$  169.2, 168.7, 139.5, 132.3, 126.6, 122.8, 122.3, 121.8, 53.1, 41.8, 36.5, 29.7, 25.5. HRMS (ESI/[ $\text{M}+\text{H}$ ] $^+$ ) calcd. for  $\text{C}_{19}\text{H}_{24}\text{N}_2\text{O}_2$ : 313.1911. Found: 313.1898.

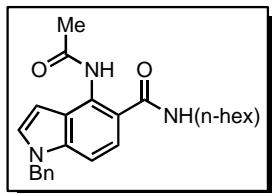

**Table 2, 3s.** General procedure II was followed and the reaction was conducted at 75 °C and on a 0.15 mmol scale. The indicated compound was purified by flash column chromatography on silica gel using hexanes:EtOAc (1:1;  $R_f$  = 0.15) to provide the product in a 47% isolated yield (27 mg, 0.069 mmol) as a white solid (mp: 161-163 °C). IR (film): 3289, 2955, 2928, 2857, 1676, 1616, 1505  $\text{cm}^{-1}$ .  $^1\text{H}$  NMR ( $\text{CDCl}_3$ ):  $\delta$  10.43 (s, 1H), 7.33-7.24 (m, 3H), 7.19 (d,  $J$  = 8.6 Hz, 1H), 7.13 (d,  $J$  = 3.2 Hz, 1H), 7.10 (d,  $J$  = 6.7 Hz, 2H), 7.05 (d,  $J$  = 8.5 Hz, 1H), 6.64 (d,  $J$  = 2.8 Hz, 1H), 6.17 (s, 1H), 5.29 (s, 2H), 3.43-3.32 (m, 2H), 2.26 (s, 3H), 1.65-1.53 (m, 2H), 1.42-1.23 (m, 6H), 0.95-0.85 (m, 3H);  $^{13}\text{C}\{^1\text{H}\}$  NMR ( $\text{CDCl}_3$ ):  $\delta$  170.2, 168.8, 138.9, 137.1, 131.7, 129.0, 128.8, 128.0, 127.0, 124.0, 120.3, 107.0, 104.6, 50.5, 40.2, 31.7, 29.8, 26.9, 24.8, 22.8, 14.2. HRMS (ESI/[ $\text{M}+\text{H}$ ] $^+$ ) calcd. for  $\text{C}_{24}\text{H}_{29}\text{N}_3\text{O}_2$ : 392.2333. Found: 392.2315.

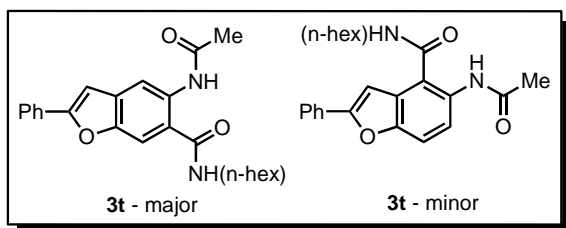

**Table 2, 3t.** General procedure II was followed and the reaction was conducted at 120 °C. The indicated regioisomers were purified by flash column chromatography on silica gel using hexanes:EtOAc (2:1;  $R_f$ (**3t-major**) = 0.30 and  $R_f$ (**3t-minor**) = 0.22) to provide the product isomers in a combined 68% isolated yield (**3t-major** - 42 mg, 0.11 mmol and **3t-minor** - 21 mg, 0.056 mmol) as pale yellow solids. **3t-major** – mp = 154-156 °C; IR (film): 3373, 2957, 2929, 2855, 1658, 1641, 1593, 1543, 1514  $\text{cm}^{-1}$ ;  $^1\text{H}$  NMR ( $\text{CDCl}_3$ ):  $\delta$  10.92 (s, 1H), 8.66 (s, 1H), 7.80 (d,  $J$  = 7.8 Hz, 2H), 7.56 (s, 1H), 7.44 (t,  $J$  = 7.6 Hz, 2H), 7.38 (d,  $J$  = 7.3 Hz, 1H), 6.94 (s, 1H), 6.57 (s, 1H), 3.47-3.39 (m, 2H), 2.18 (s, 3H), 1.72-1.59 (m, 2H), 1.49-1.30 (m, 6H), 0.92 (m, 3H);  $^{13}\text{C}\{^1\text{H}\}$  NMR ( $\text{CDCl}_3$ ):  $\delta$  169.5, 169.1, 159.1, 150.1, 134.7, 132.6, 129.9, 129.4, 129.1, 125.3, 118.6, 113.6, 109.4, 101.8, 40.4, 31.7, 29.7, 26.9, 25.4, 22.8, 14.2; HRMS (ESI/[ $\text{M}+\text{H}$ ] $^+$ ) calcd. for  $\text{C}_{23}\text{H}_{26}\text{N}_2\text{O}_3$ : 379.2016. Found: 379.2012. **3t-minor** – mp = 189-191 °C; IR (film): 3264, 2922, 1659, 1633, 1608, 1555, 1531  $\text{cm}^{-1}$ .  $^1\text{H}$  NMR ( $\text{CDCl}_3$ ):  $\delta$  10.40 (s, 1H), 8.37 (d,  $J$  = 9.0 Hz, 1H), 7.85 (d,  $J$  = 7.3 Hz, 2H), 7.56 (d,  $J$  = 9.0 Hz, 1H), 7.52-7.36 (m, 3H), 7.06 (s, 1H), 6.35 (s, 1H), 3.58-3.50 (m, 2H), 2.18 (s, 3H), 1.77-1.67 (m, 2H), 1.57-1.32 (m, 6H), 0.98-0.90 (m, 3H);  $^{13}\text{C}\{^1\text{H}\}$  NMR ( $\text{CDCl}_3$ ):  $\delta$  169.1, 168.2, 158.0, 151.4, 134.9, 129.8, 129.6, 129.2, 126.7, 125.4, 119.0, 114.8, 114.3, 100.3, 40.3, 31.7, 29.8, 27.1, 25.3, 22.9, 14.2. HRMS (ESI/[ $\text{M}+\text{H}$ ] $^+$ ) calcd. for  $\text{C}_{23}\text{H}_{26}\text{N}_2\text{O}_3$ : 379.2016. Found: 379.2011.

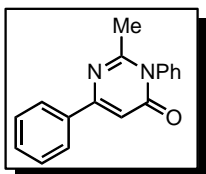

**Equation 2, 4a.** General procedure II was followed and the reaction was conducted at 105 °C. The indicated compound was purified by flash column chromatography on silica gel using hexanes:EtOAc (2:1;  $R_f$  = 0.20) in a 96% isolated yield (63 mg, 0.24 mmol) as a white solid (mp: 162-164 °C). IR (film): 3056, 1670, 1601, 1590, 1571, 1538  $\text{cm}^{-1}$ .  $^1\text{H}$  NMR ( $\text{CDCl}_3$ ):  $\delta$  8.10-8.00 (m, 2H), 7.60 (t,  $J$  = 7.5 Hz, 2H), 7.57-7.46 (m, 4H), 7.30 (d,  $J$  = 6.9 Hz, 2H), 6.92 (s, 1H), 2.30 (s, 3H);  $^{13}\text{C}\{^1\text{H}\}$  NMR ( $\text{CDCl}_3$ ):  $\delta$  163.4, 160.4, 159.1, 137.6, 136.6, 130.8, 130.3, 129.6, 129.0, 127.7, 127.2, 107.9, 24.5. HRMS (ESI/[M+H] $^+$ ) calcd. for  $\text{C}_{17}\text{H}_{14}\text{N}_2\text{O}$ : 263.1179. Found: 263.1169.

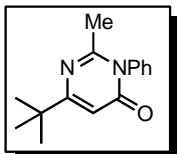

**Equation 2, 4b.** General procedure II was followed and the reaction was conducted at 105 °C. The indicated compound was purified by flash column chromatography on silica gel using hexanes:EtOAc (2:1;  $R_f$  = 0.27) in a 92% isolated yield (56 mg, 0.23 mmol) as a white solid (mp: 108-109 °C). IR (film): 2960, 1668, 1601, 1586, 1549  $\text{cm}^{-1}$ .  $^1\text{H}$  NMR ( $\text{CDCl}_3$ ):  $\delta$  7.58-7.45 (m, 3H), 7.25-7.18 (m, 2H), 6.41 (s, 1H), 2.15 (s, 3H), 1.28 (s, 9H);  $^{13}\text{C}\{^1\text{H}\}$  NMR ( $\text{CDCl}_3$ ):  $\delta$  174.1, 163.7, 157.7, 137.9, 130.2, 129.4, 127.8, 107.3, 37.2, 28.8, 24.3. HRMS (ESI/[M+H] $^+$ ) calcd. for  $\text{C}_{15}\text{H}_{18}\text{N}_2\text{O}$ : 243.1492. Found: 243.1489.

## VI. Mechanistic Studies

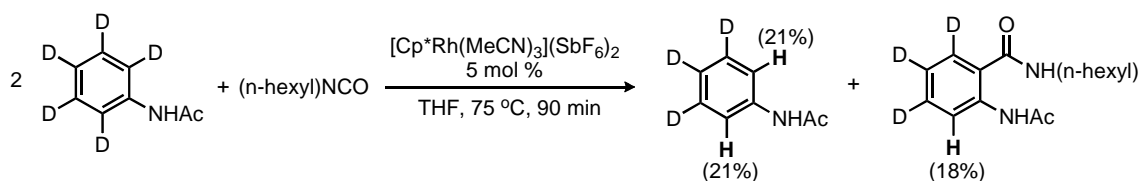

**Reversibility of acetanilide cyclorhodation.** In a  $\text{N}_2$ -filled glovebox,  $[\text{Cp}^*\text{Rh}(\text{MeCN})_3](\text{SbF}_6)_2$  (10.4 mg, 0.0125 mmol), acetanilide- $d_5$  (70.2 mg, 0.500 mmol) and hexyl isocyanate (0.0364 mL, 0.250 mmol) were added to a screw-capped vial followed by addition of a stir bar and THF (1.0 mL, [isocyanate] = 0.250 mM). The vial was sealed with a cap containing a PTFE septum and was removed from the glovebox. The reaction vial was then placed in a temperature-controlled aluminum-heating block set at 75 °C. After 90 min of stirring, the vial was removed from the heating block and was left to cool to ambient temperature. After removal of the solvent, the residue was purified by flash column chromatography on silica gel using hexanes:EtOAc (2:1). A combined 88% yield of material (relative to 0.500 mmol acetanilide- $d_5$ ), consisting of acetanilide- $d_4$  (51 mg, 0.36 mmol) and product  $N$ -acyl anthranilamide- $d_4$  (20 mg, 0.078 mmol, 31%), was recovered. Each isolated compound showed modest deuterium loss at the *ortho*-positions (acetanilide, 21% H;  $N$ -acyl anthranilamide, 18% H) as determined by  $^1\text{H}$  NMR integration (Figure S1 and S2).

**Figure S1.**

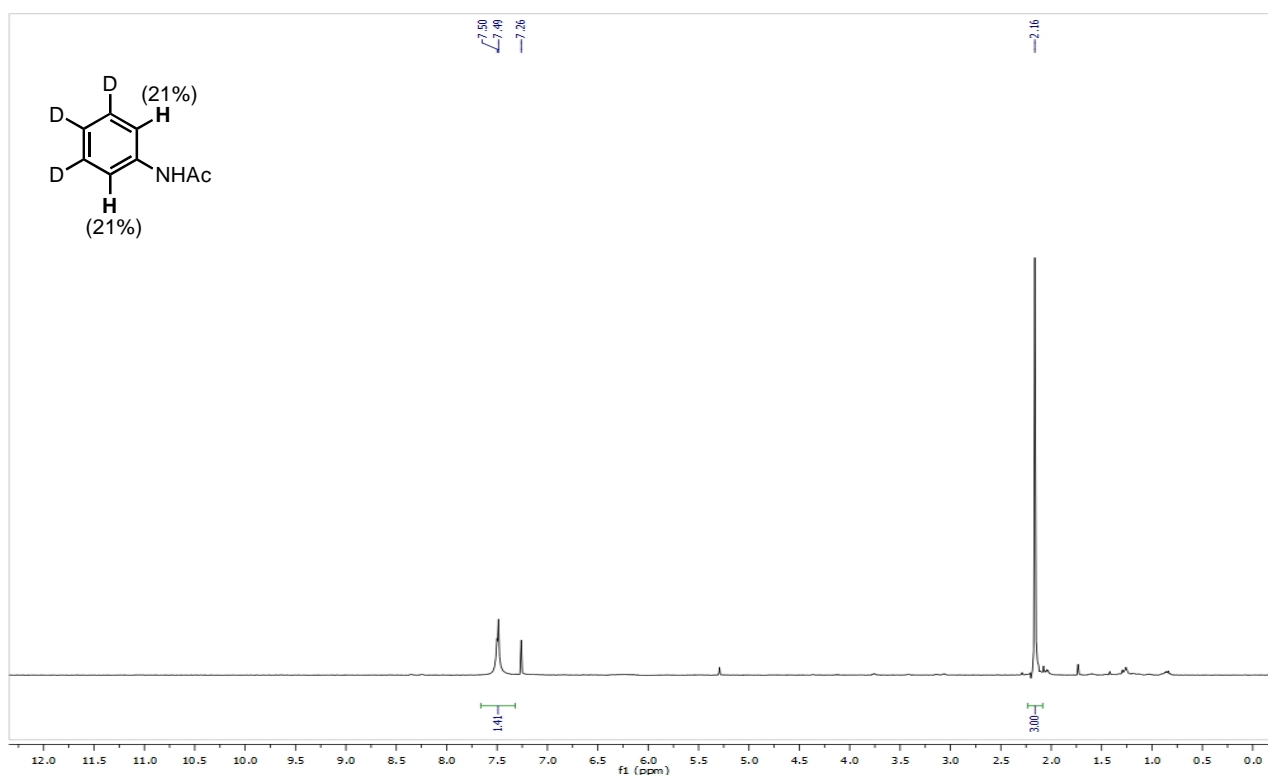

**Figure S2.**

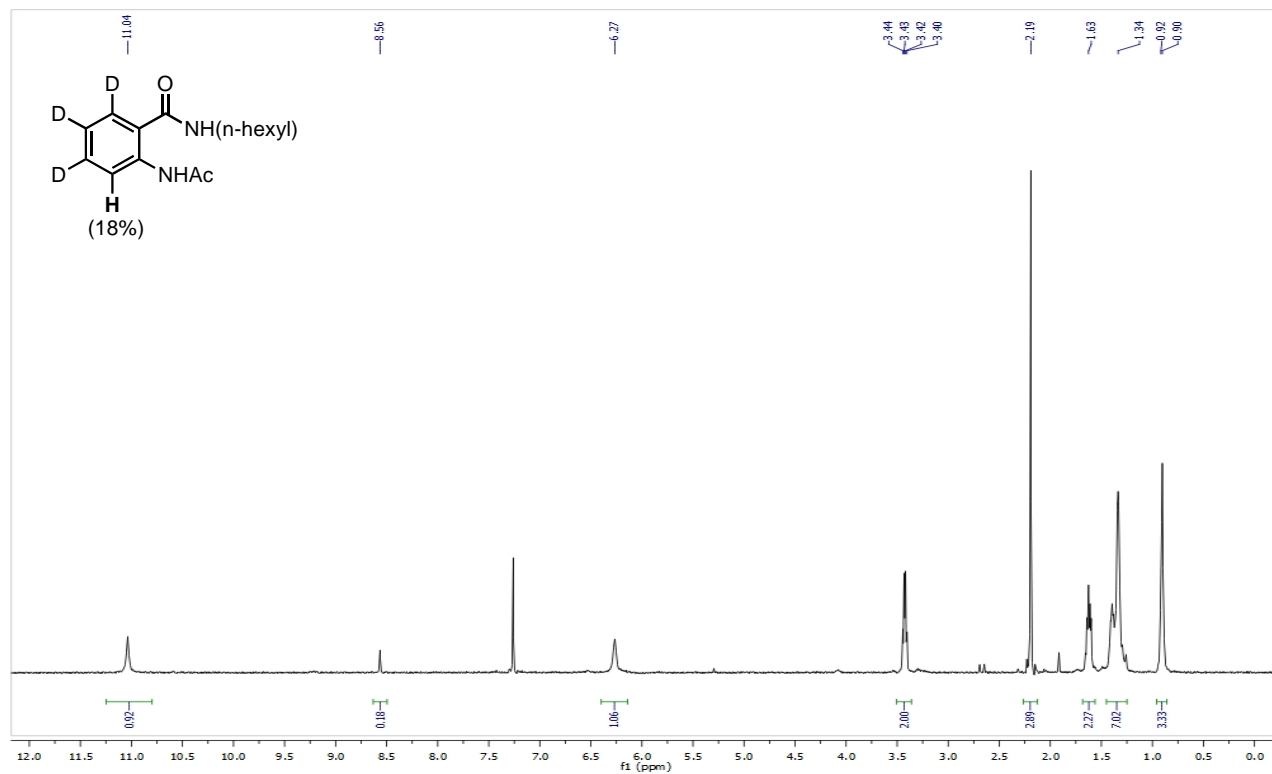

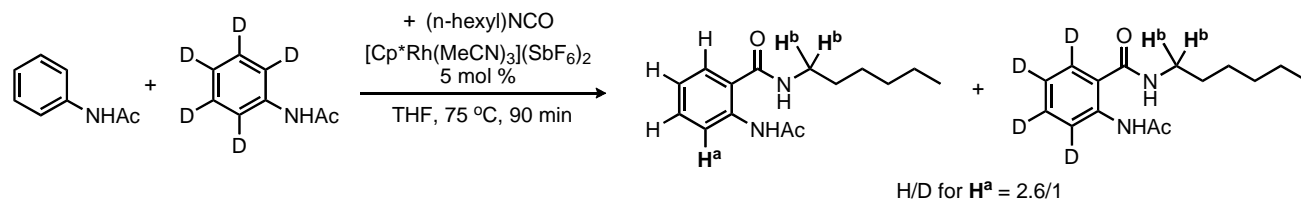

**Intermolecular competition between protio- and deuterio-acetanilide at early reaction conversion.** In a N<sub>2</sub>-filled glovebox, [Cp\*Rh(MeCN)<sub>3</sub>](SbF<sub>6</sub>)<sub>2</sub> (10.4 mg, 0.0125 mmol), acetanilide-*d*<sub>5</sub> (35.0 mg, 0.250 mmol), acetanilide (33.8 mg, 0.250 mmol), and hexyl isocyanate (0.0364 mL, 0.250 mmol) were added to a screw-capped vial followed by addition of a stir bar and THF (1.0 mL, [isocyanate] = 0.250 mM). The vial was sealed with a cap containing a PTFE septum and was removed from the glovebox. The reaction vial was then placed in a temperature-controlled aluminum-heating block set at 75 °C. After 90 min of stirring, the vial was removed from the heating block and was left to cool to ambient temperature. After removal of the solvent, the residue was purified by flash column chromatography on silica gel using hexanes:EtOAc (2:1). Relative to 0.500 mmol acetanilide, an 85% mass recovery (0.34 mmol of acetanilide and 0.084 mmol of *N*-acyl anthranilamide) was achieved. Based upon the initial amount of isocyanate (0.250 mmol), 34% conversion to the *N*-acyl anthranilamide was observed. The amount of product derived from acetanilide (*N*<sub>H</sub>) was determined by integration of H<sup>a</sup>, which appeared as a doublet at 8.56 ppm, and the total amount of product (*N*<sub>total</sub>) was determined by integration of H<sup>b</sup>, which appeared as a multiplet at 3.43 ppm for both the deuterio- and protio-anthranilamide products (Figure S3). The amount of product derived from acetanilide-*d*<sub>5</sub> (*N*<sub>D</sub>) was then calculated by subtraction: *N*<sub>D</sub> = *N*<sub>total</sub> - *N*<sub>H</sub> (H/D for H<sub>a</sub> = 2.6:1). Even upon completely subtracting the 18% background deuterium loss observed for the deuterated anthranilimide shown in Figure S2, the minimum relative rate of protio-versus deuterio-acetanilide conversion to product is 2.0:1. These results are consistent with a primary rather than a secondary isotope effect. However, a much more thorough kinetic examination of this reaction is required before precise kinetic isotope effect values can be assigned unambiguously.

**Figure S3.**

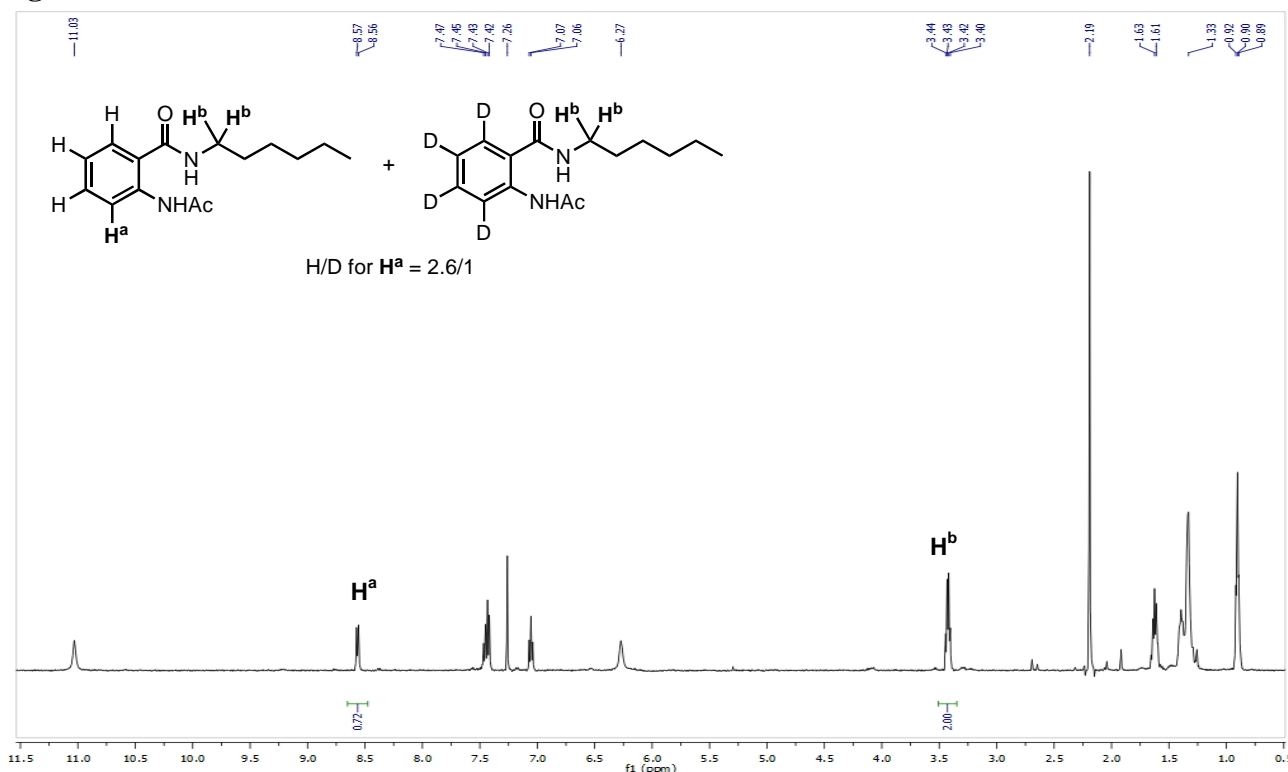

S18

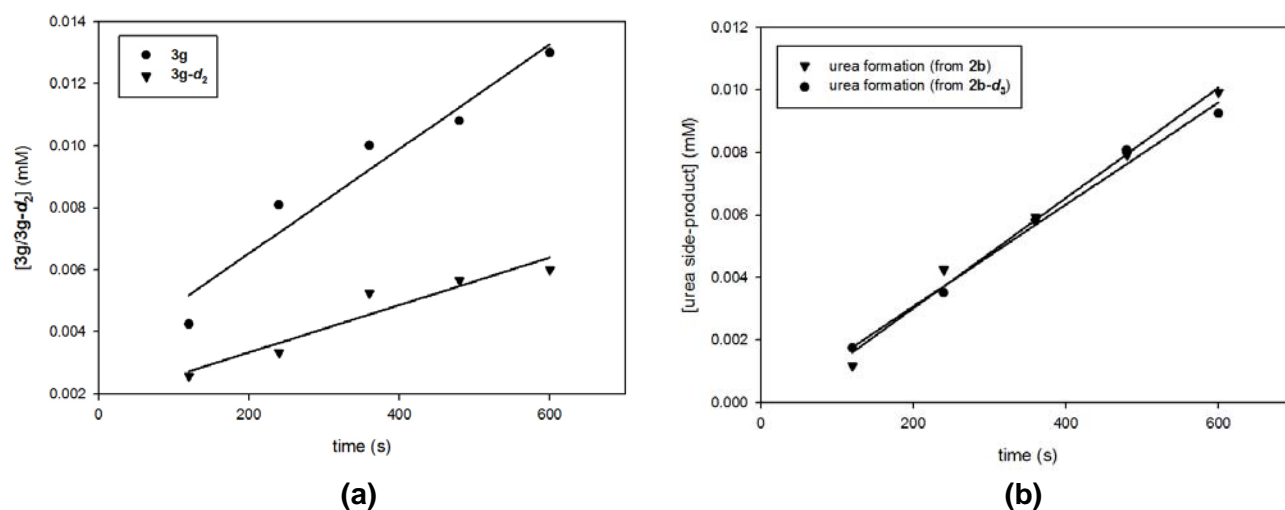

**Figure S4.** (a) Plot of enamide amide product concentration versus time for the Rh-catalyzed addition of phenyl isocyanate to **3g** and **3g-d<sub>2</sub>**. For **3g**:  $y = 1.69\text{e-}5 + 3.20\text{e-}3$  ( $R^2 = 0.9422$ ); and for **3g-d<sub>2</sub>**:  $y = 7.65\text{e-}6 + 1.80\text{e-}3$  ( $R^2 = 0.9145$ ). (b) Plot of urea side-product concentration versus time for the addition of phenyl isocyanate to *N*-acyl enamides **2b** and **2b-d<sub>3</sub>**. For **2b**:  $y = 1.76\text{e-}5 - 5.00\text{e-}4$  ( $R^2 = 0.9890$ ); and for **2b-d<sub>3</sub>**:  $y = 1.63\text{e-}5 - 2.00\text{e-}4$  ( $R^2 = 0.9900$ ).

## VII. References

- <sup>S1</sup> White, C.; Thompson S. J.; Maitlis P. M. *J. Chem. Soc., Dalton Trans.* **1977**, 1654.
- <sup>S2</sup> Stuart, D. R.; Bertrand-Laperle, M.; Burgess, K. M. N.; Fagnou, K. *J. Am. Chem. Soc.* **2008**, *130*, 16474.
- <sup>S3</sup> a) Tang, W.; Capacci, A.; Sarvestani, M.; Wei, X.; Yee, N. K.; Senanayake, C. H. *J. Org. Chem.* **2009**, *74*, 9528. b) Guan, Z. -H.; Zhang, Z. -Y.; Ren, Z. -H.; Wang, Y. -Y.; Zhang, X. *J. Org. Chem.* **2011**, *76*, 339.
- <sup>S4</sup> De Luca, L.; Giacomelli, G.; Porcheddu, A. *J. Org. Chem.* **2002**, *67*, 6272.
- <sup>S5</sup> Yin, J.; Buchwald, S. L. *J. Am. Chem. Soc.* **2002**, *124*, 6043.
- <sup>S6</sup> Wang, Q. -S.; Xie, J. -H.; Li, W.; Zhu, S. -F.; Wang, L. -X.; Zhou, Q. -L. *Org. Lett.* **2011**, doi: 10.1021/ol201142v
- <sup>S7</sup> Burk, M. J.; Casy, G.; Johnson, N. B. *J. Org. Chem.* **1998**, *63*, 6084.

VIII.  $^1\text{H}$  and  $^{13}\text{C}\{^1\text{H}\}$  NMR Spectra  
(common solvent impurities are indicated with \*)

Equation 1, **1a**:

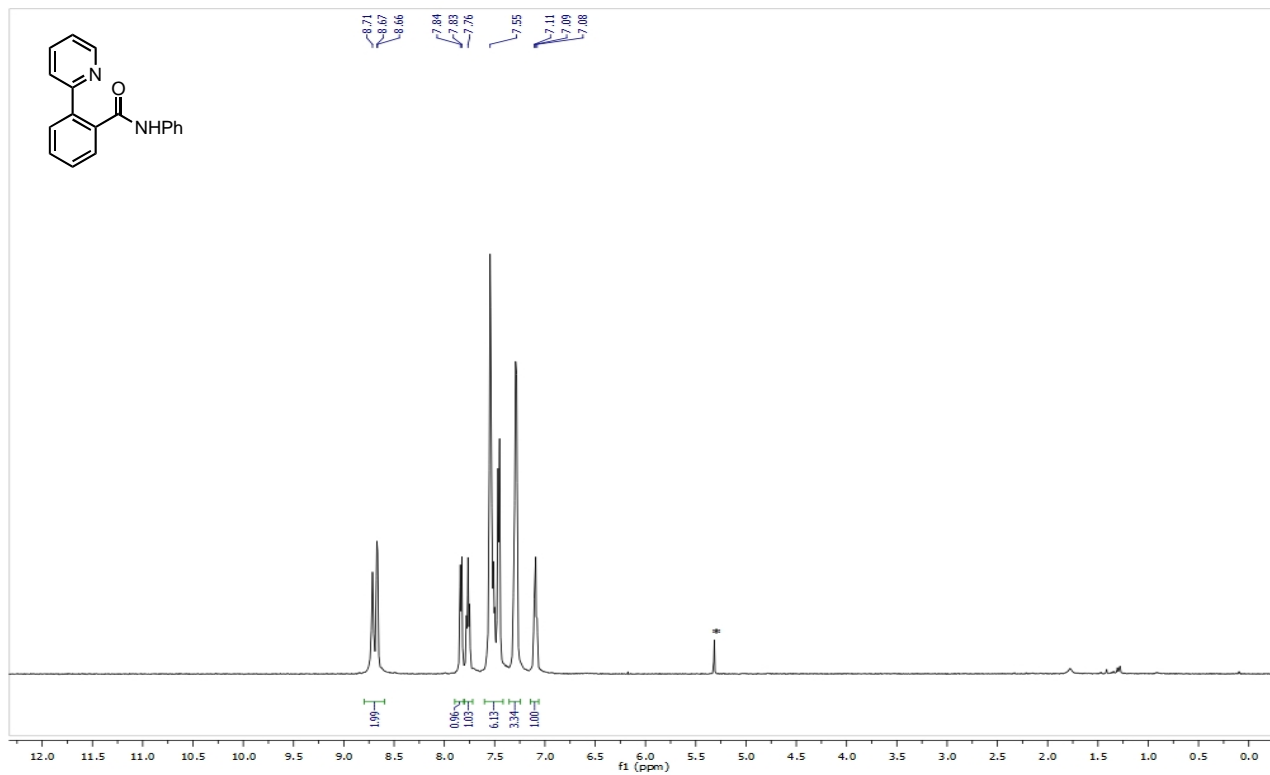

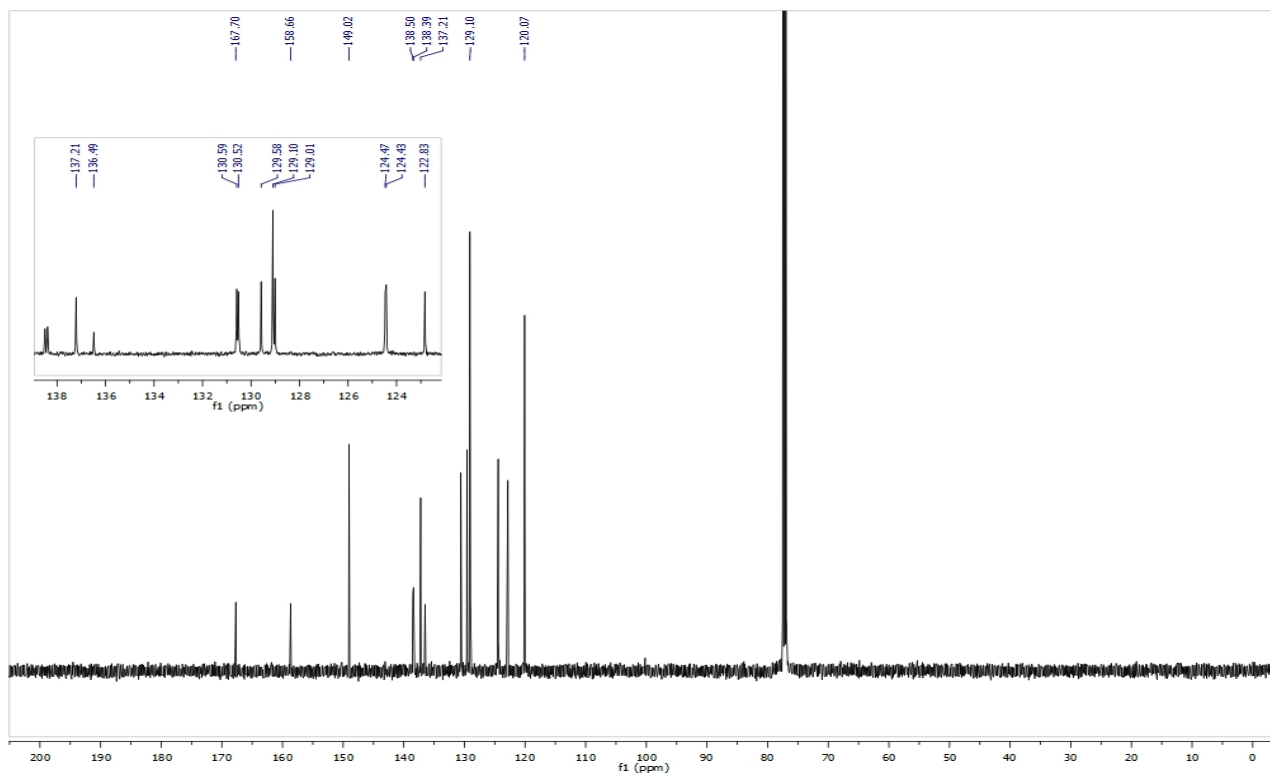

Equation 1, **1b**:

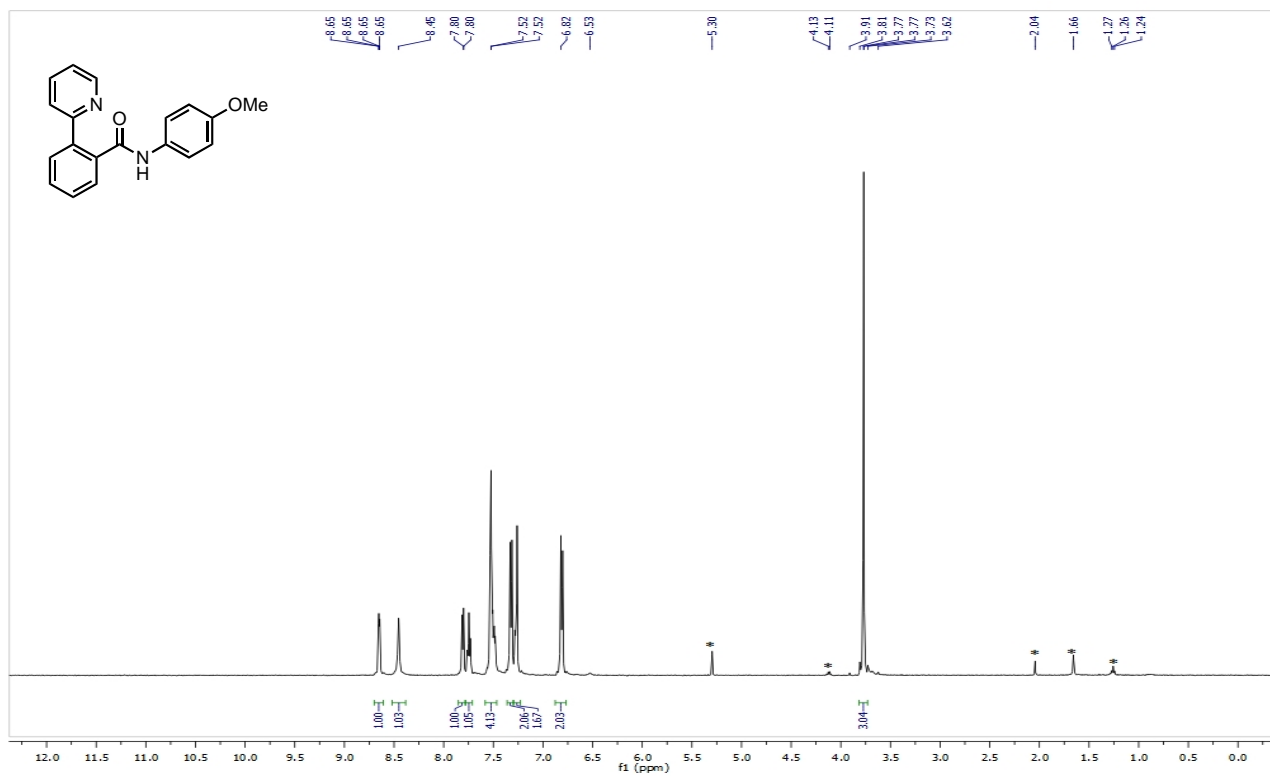

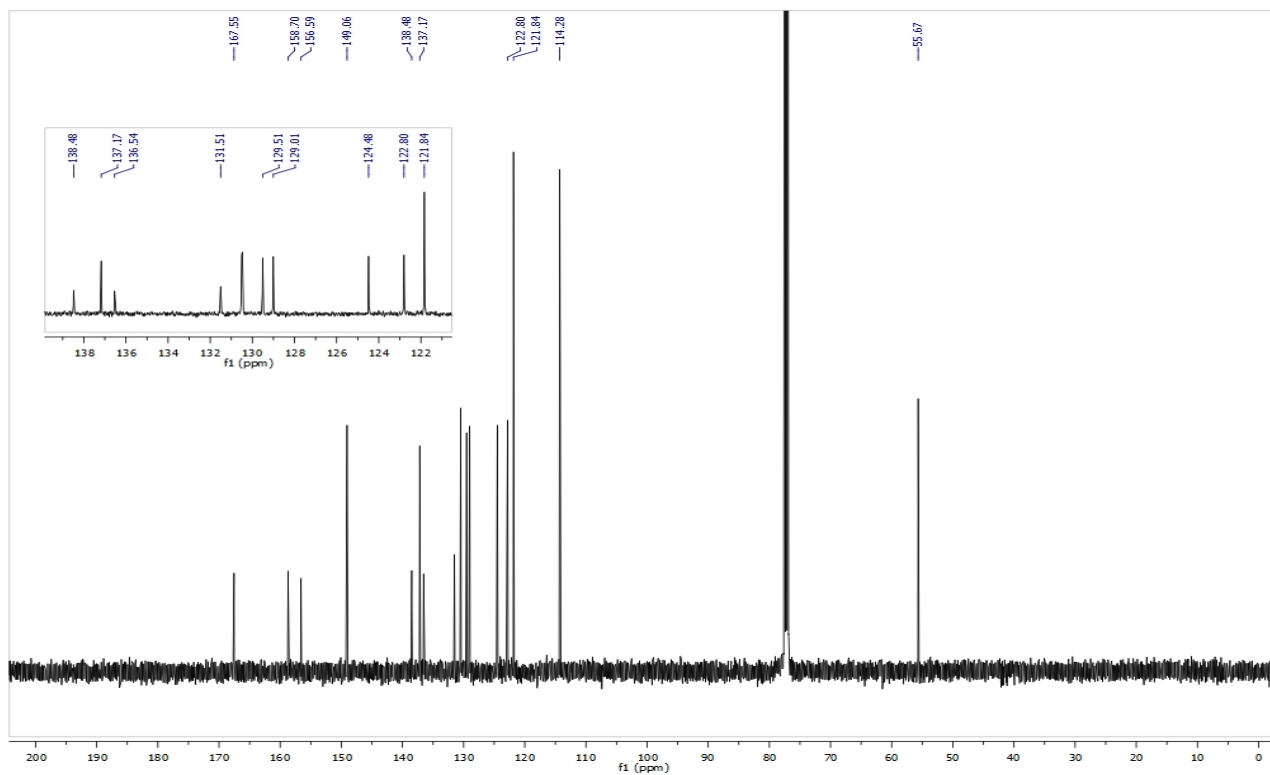

Equation 1, **1c**:

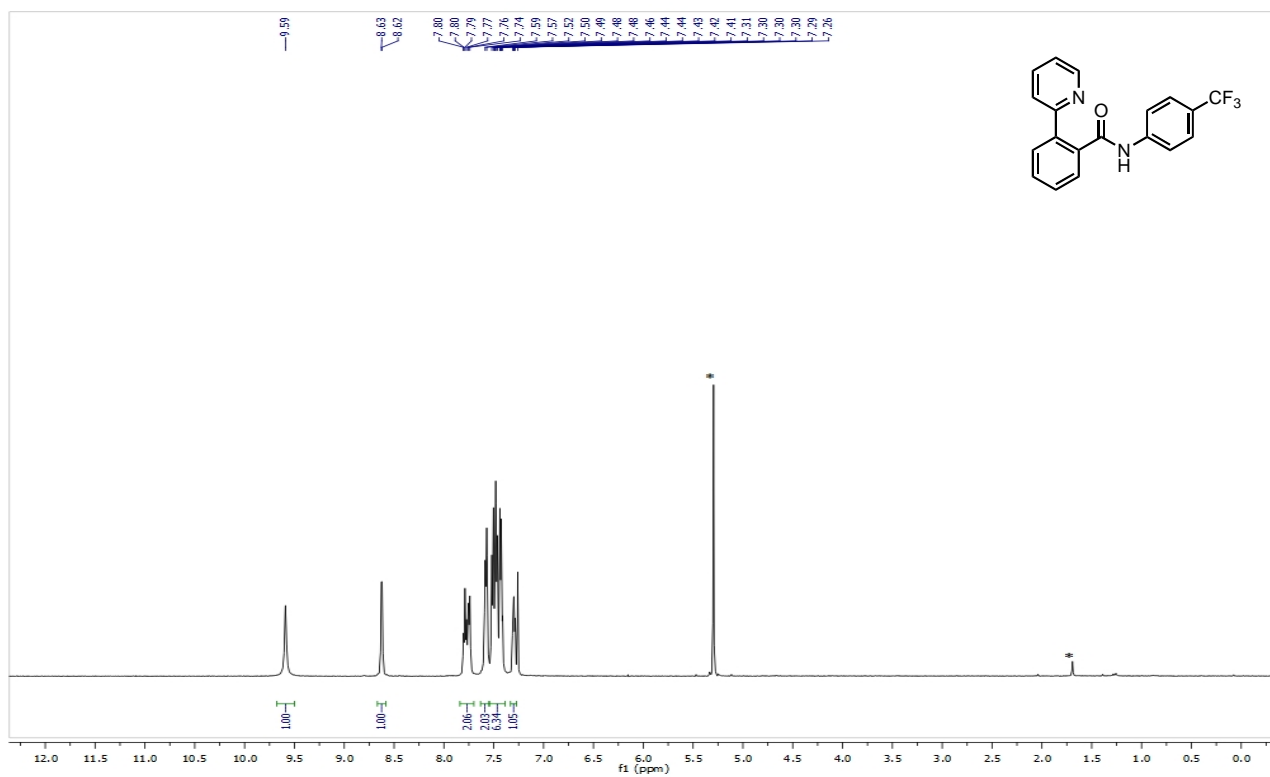

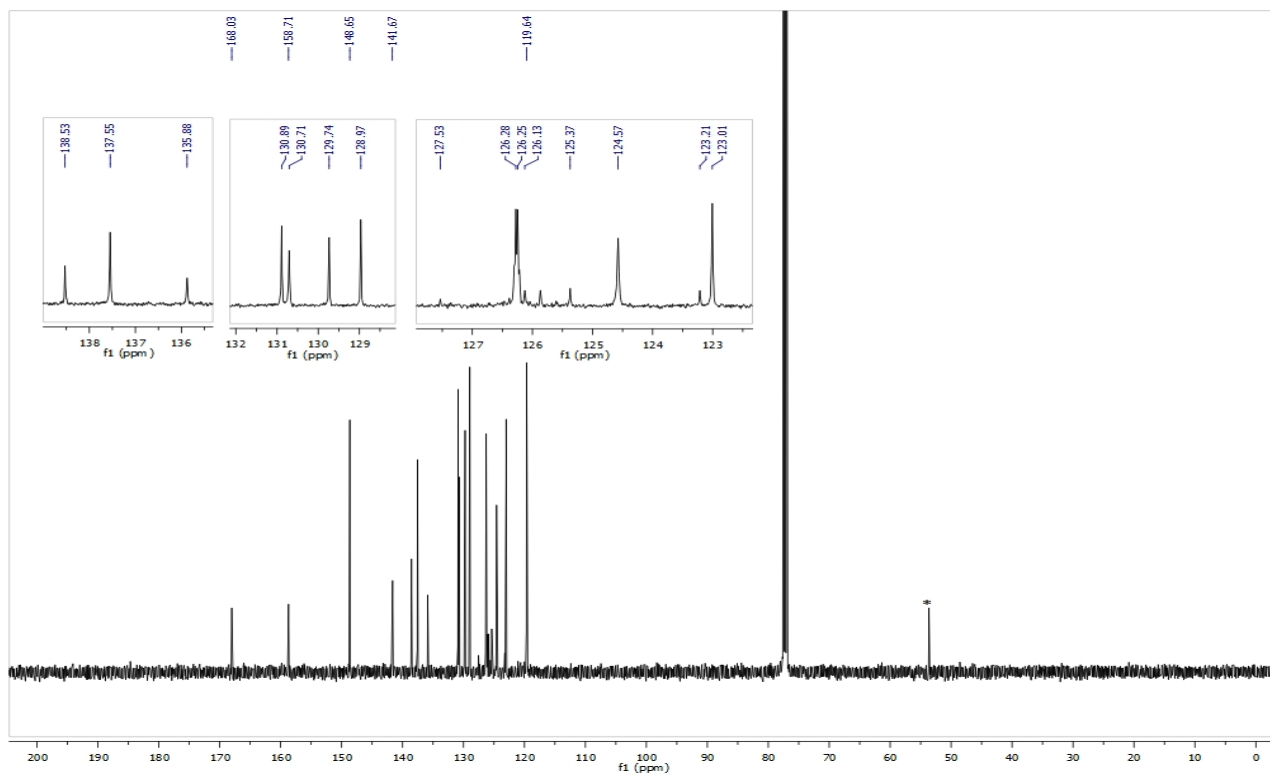

Table 2, **3a**:

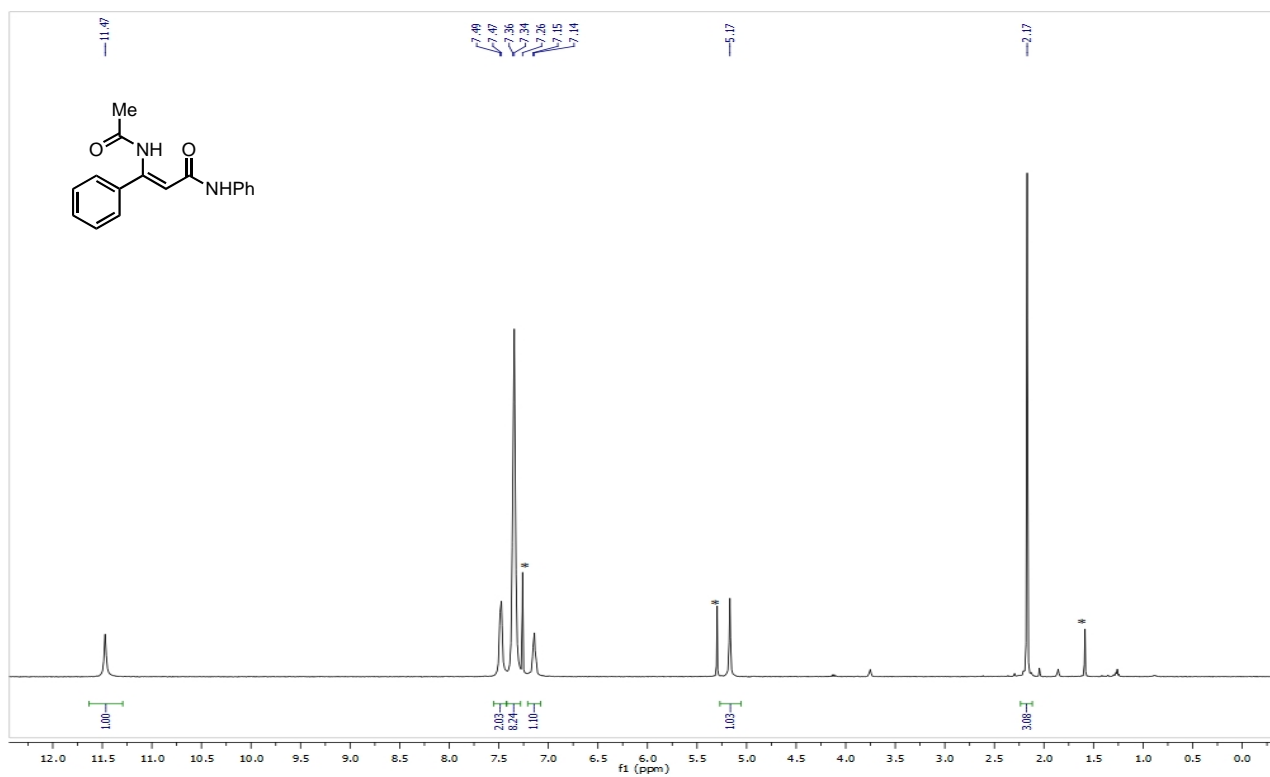

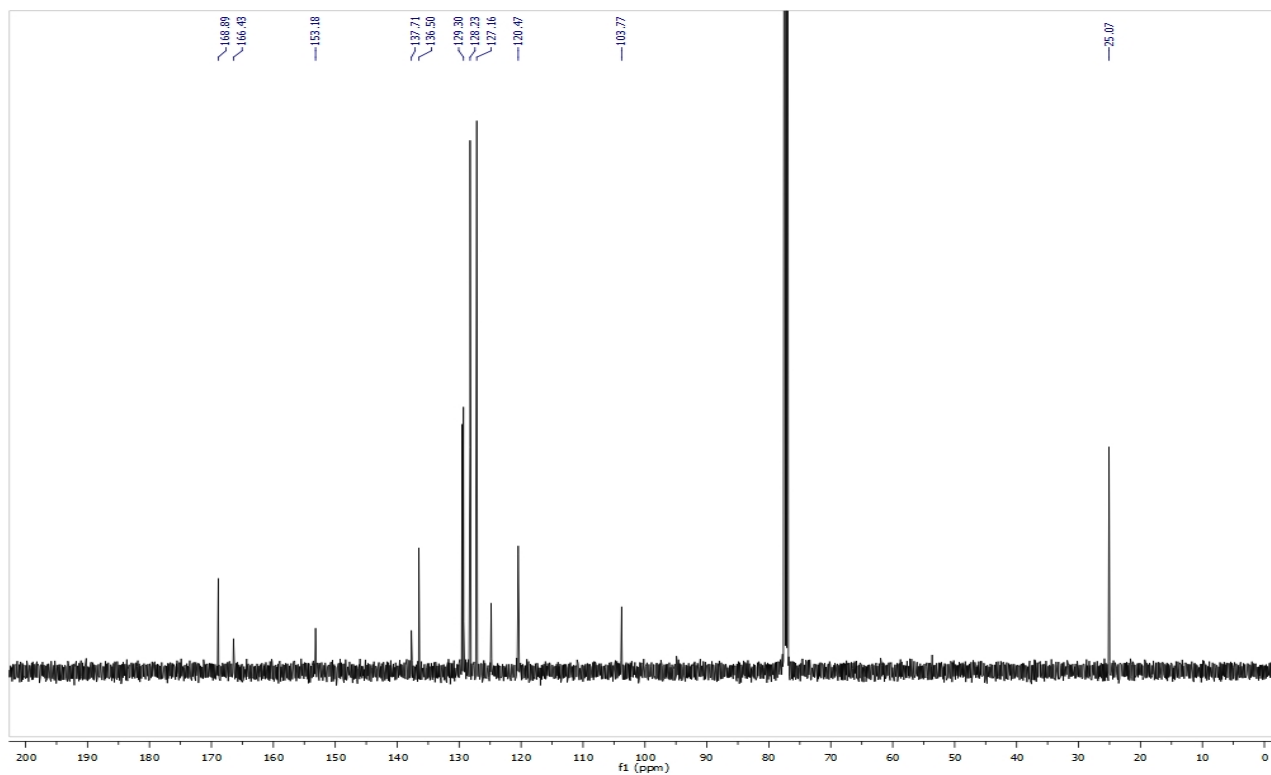

Table 2, **3b**:

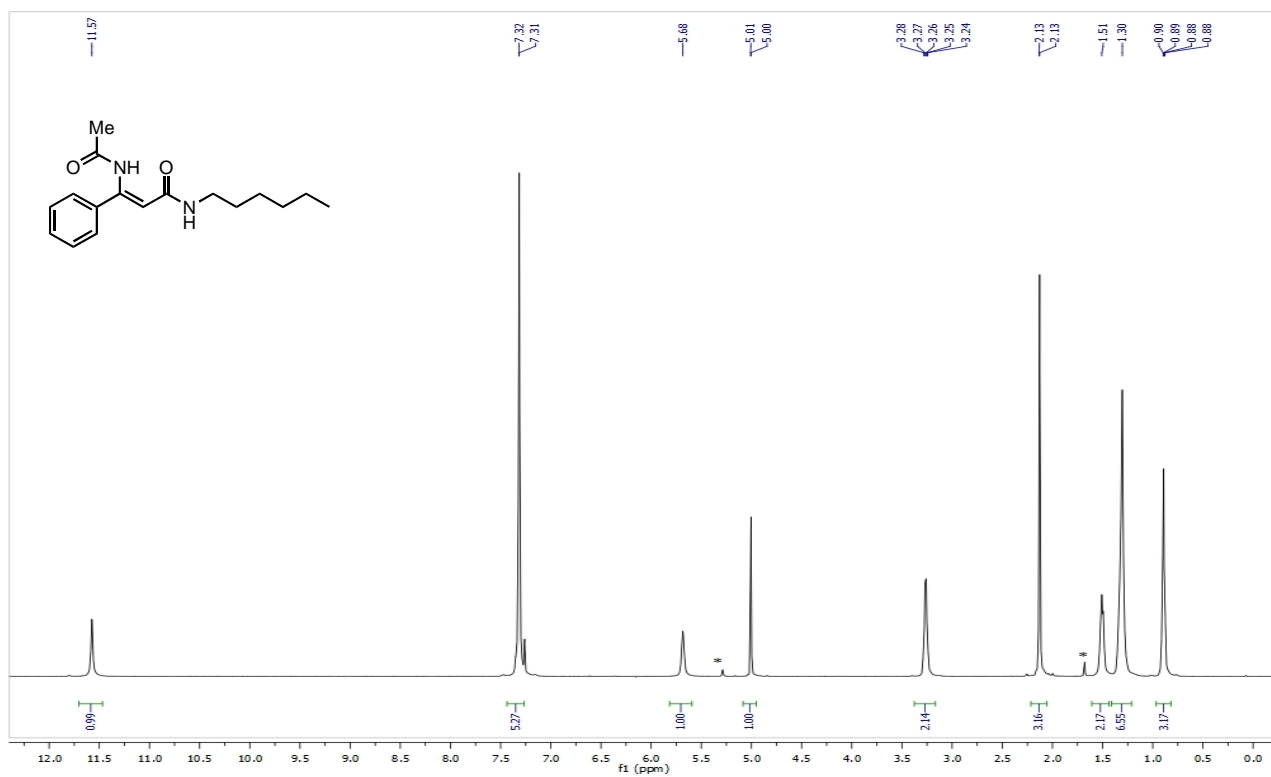

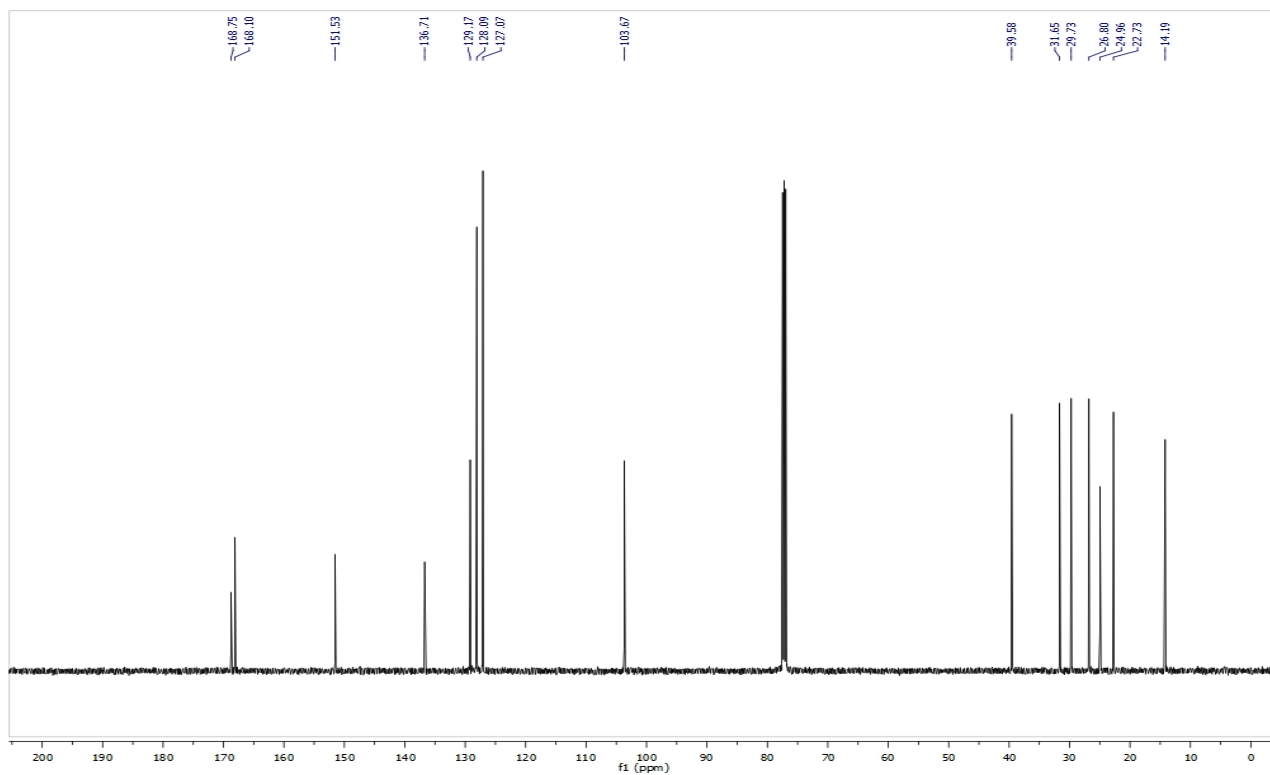

Table 2, **3c**:

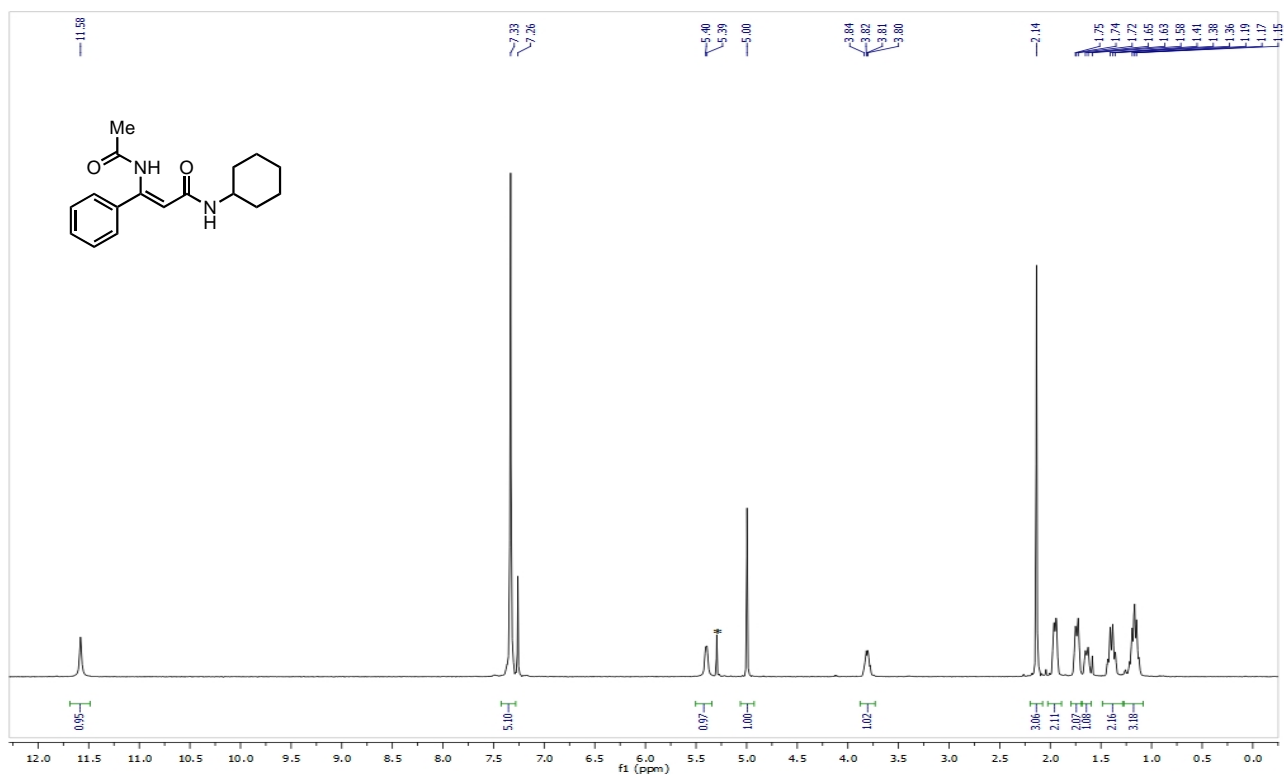

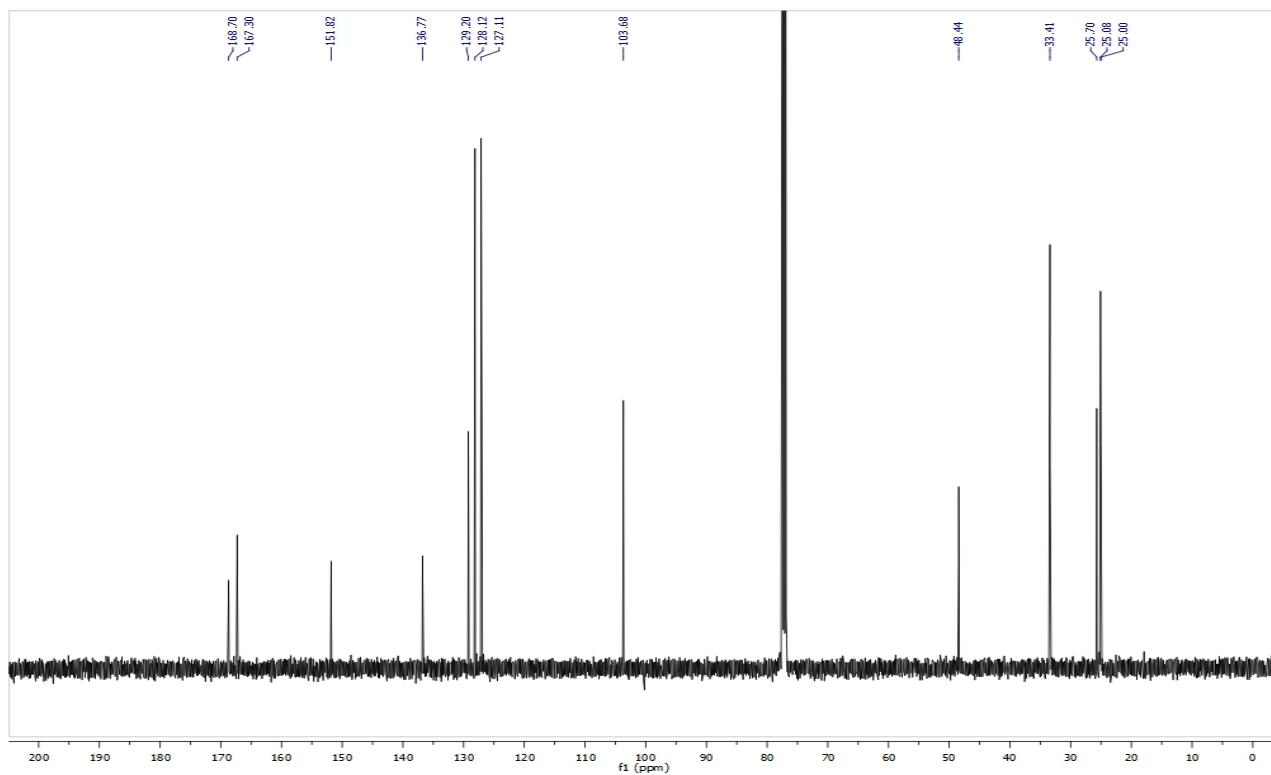

Table 2, **3d**:

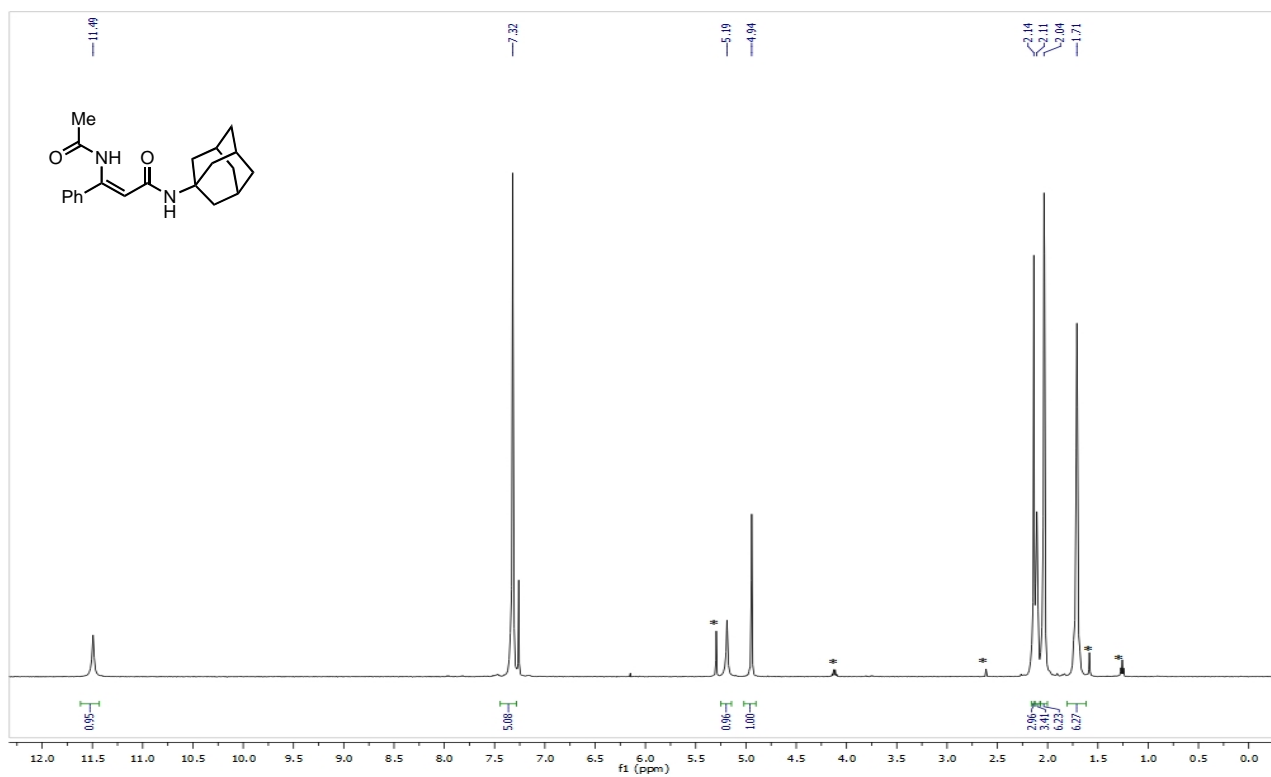

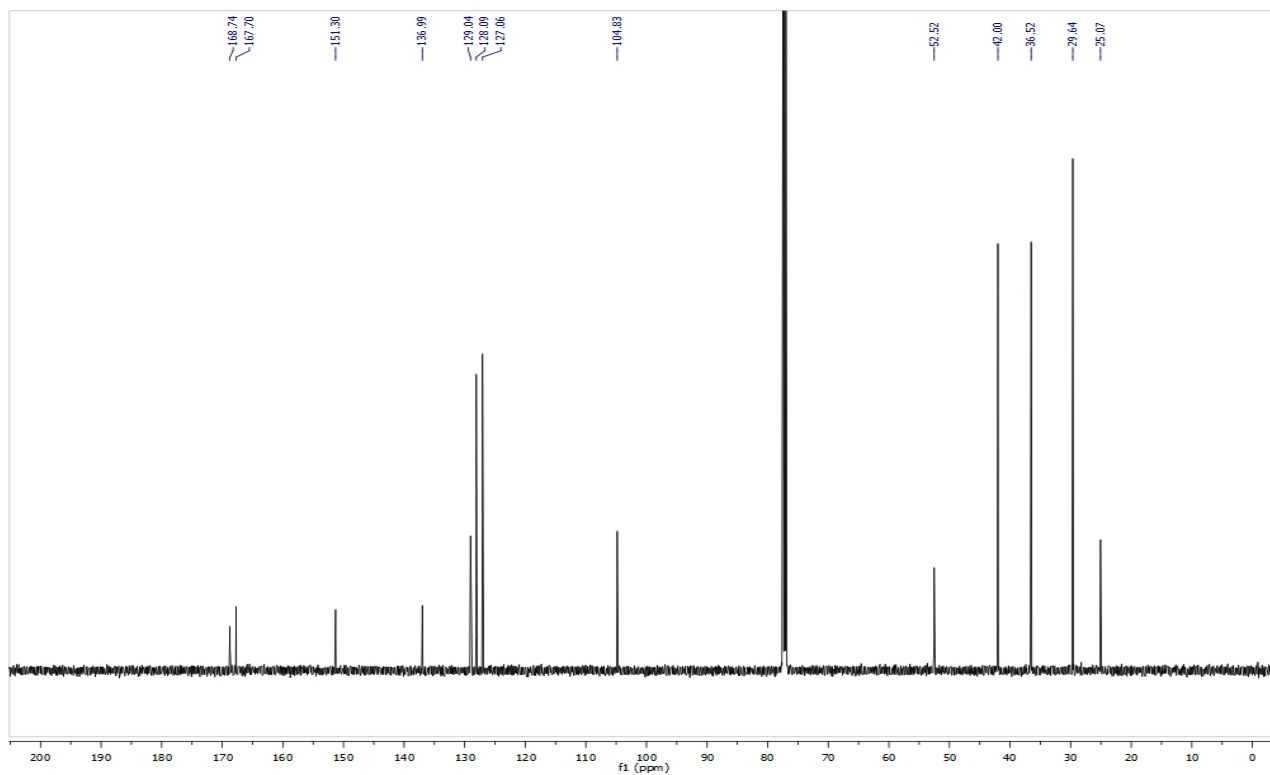

Table 2, **3e**:

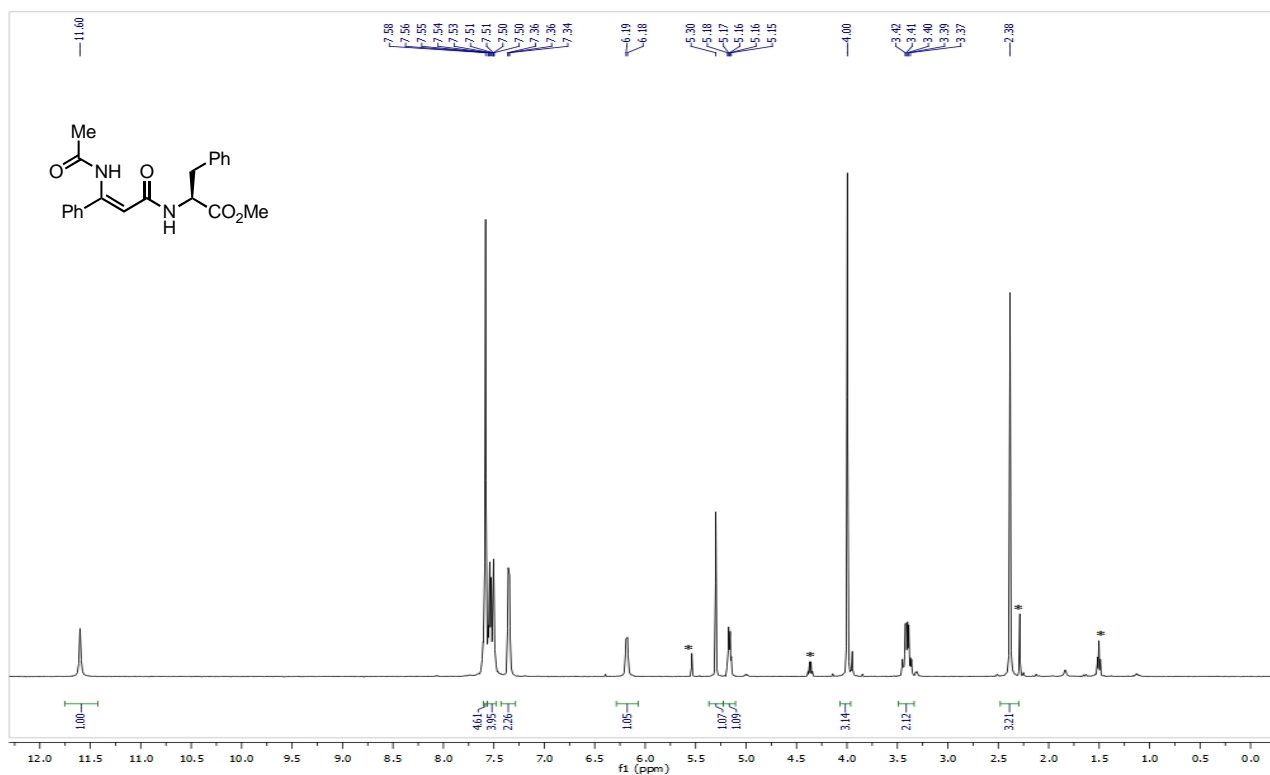

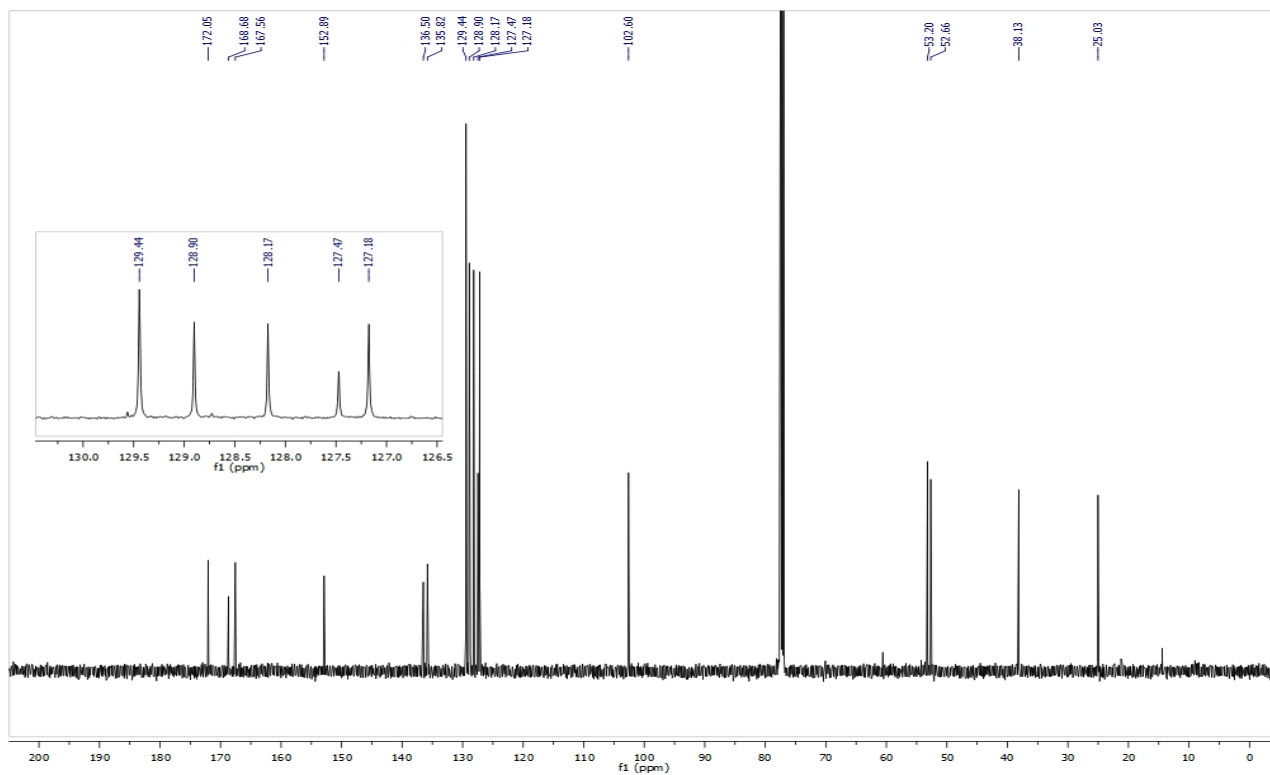

Table 2, **3f**:

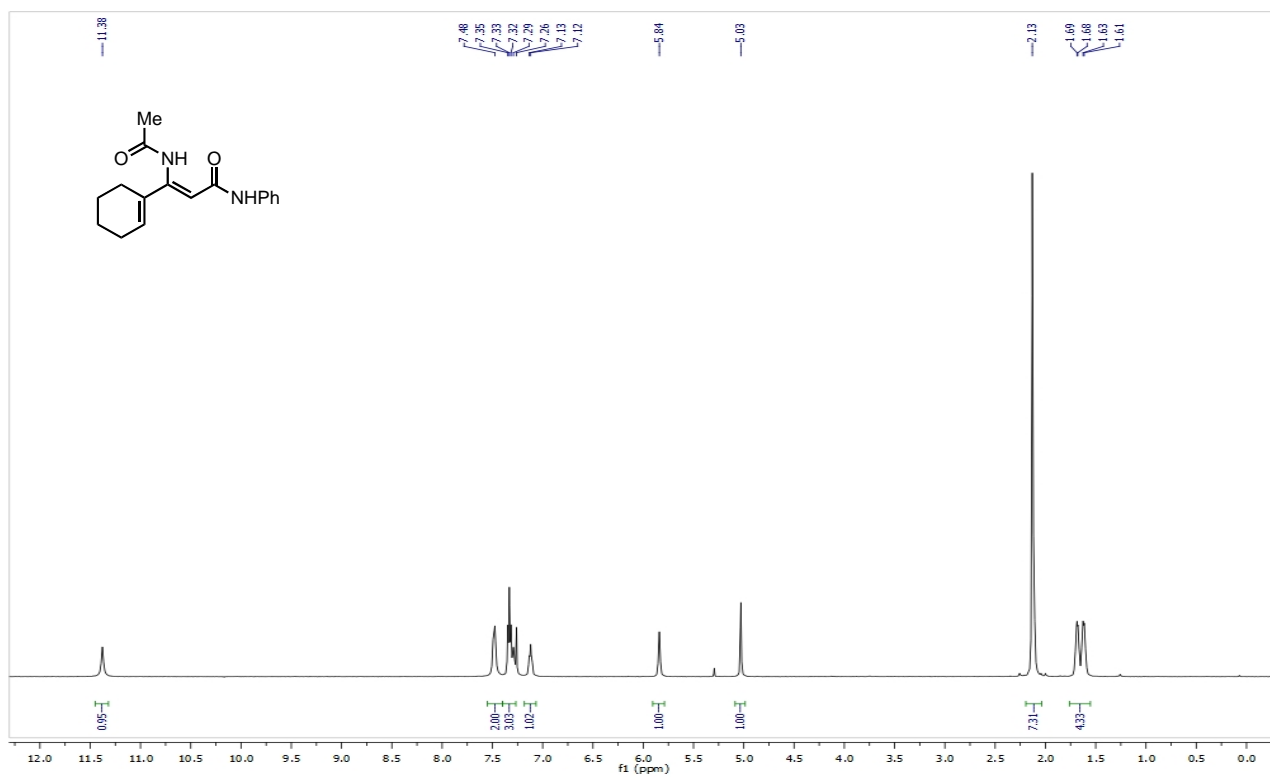

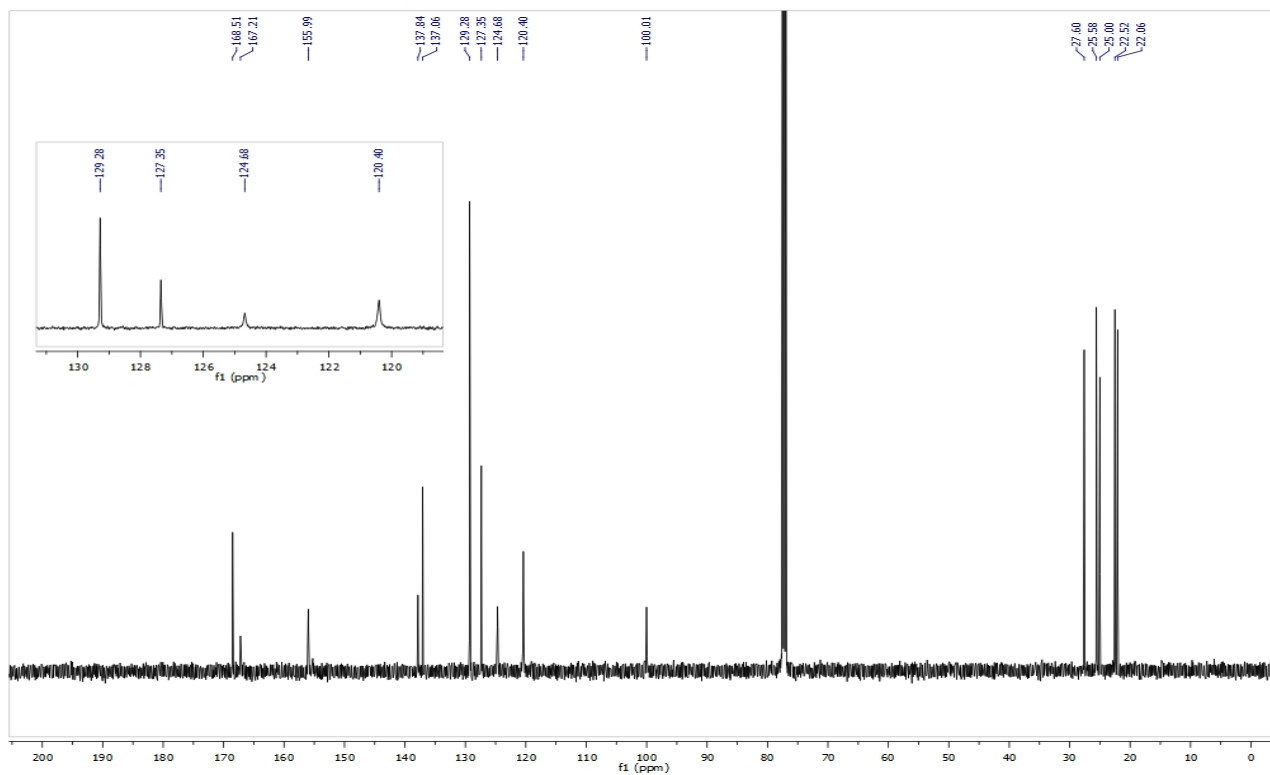

Table 2, **3g**:

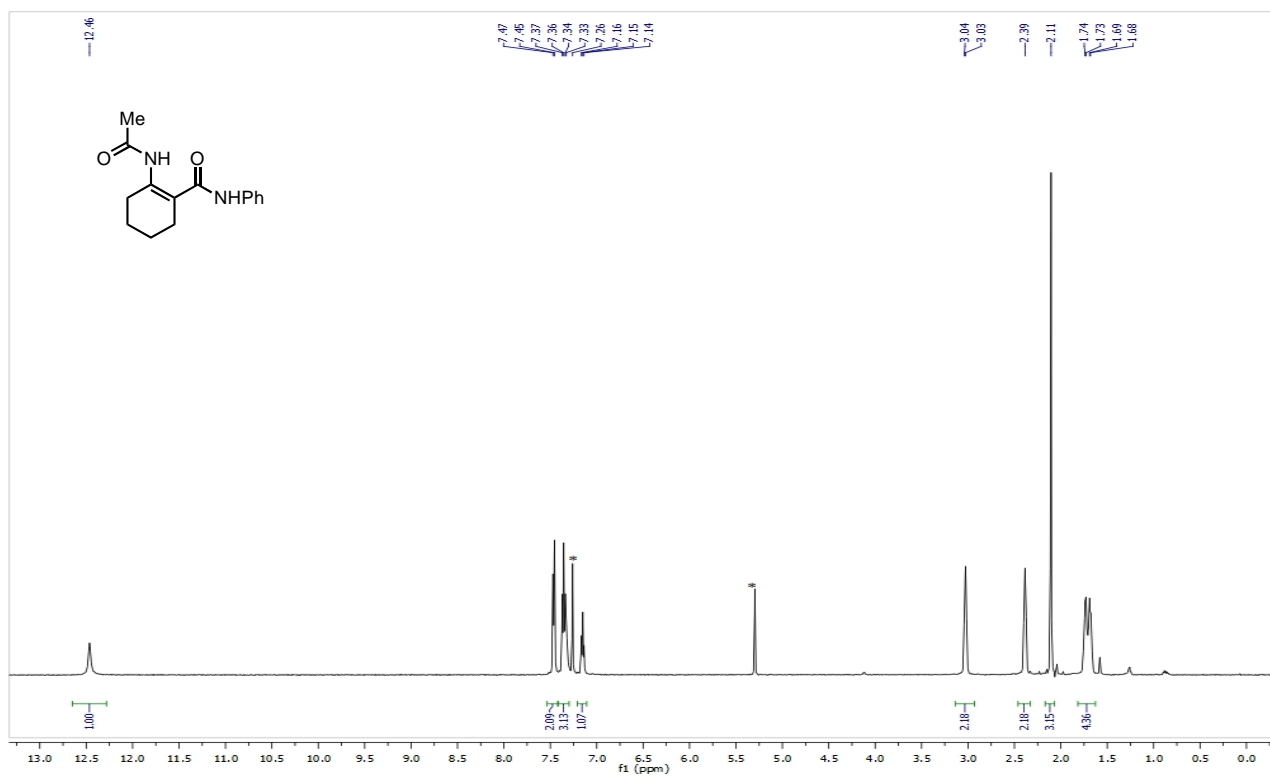

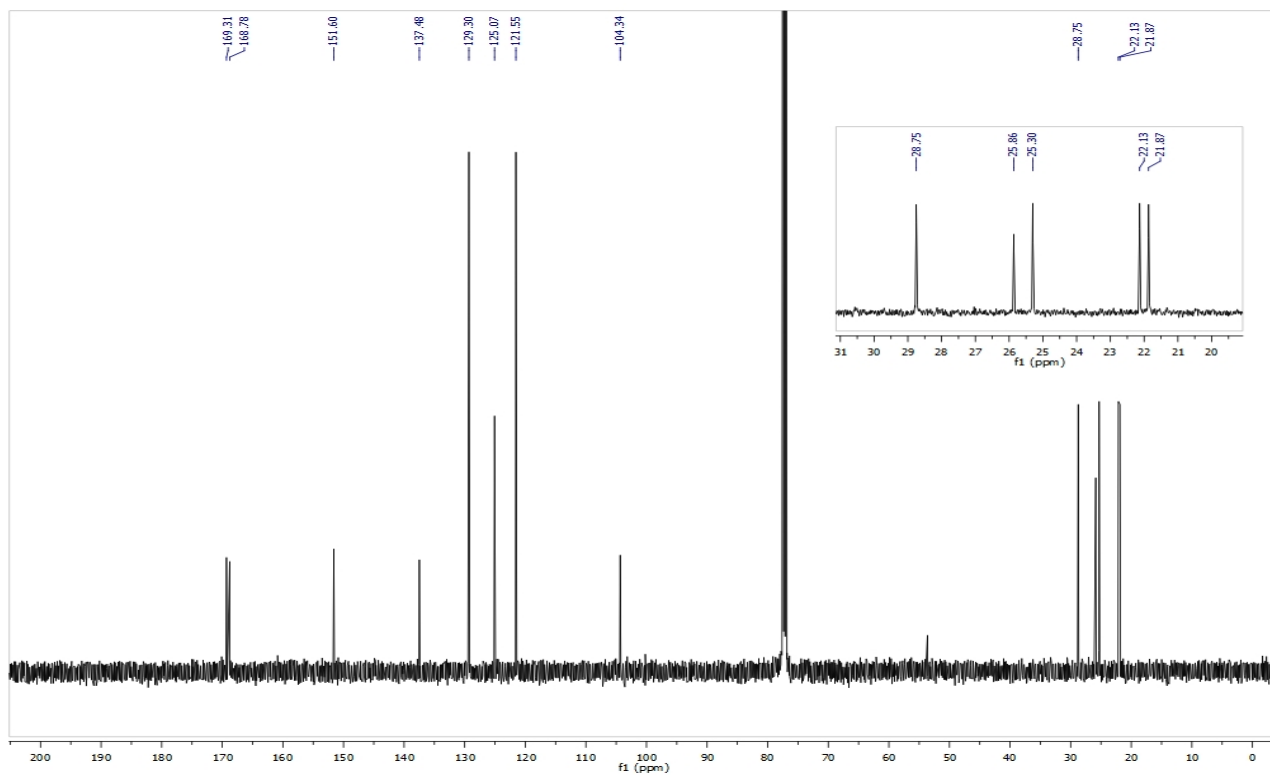

Table 2, **3h**:

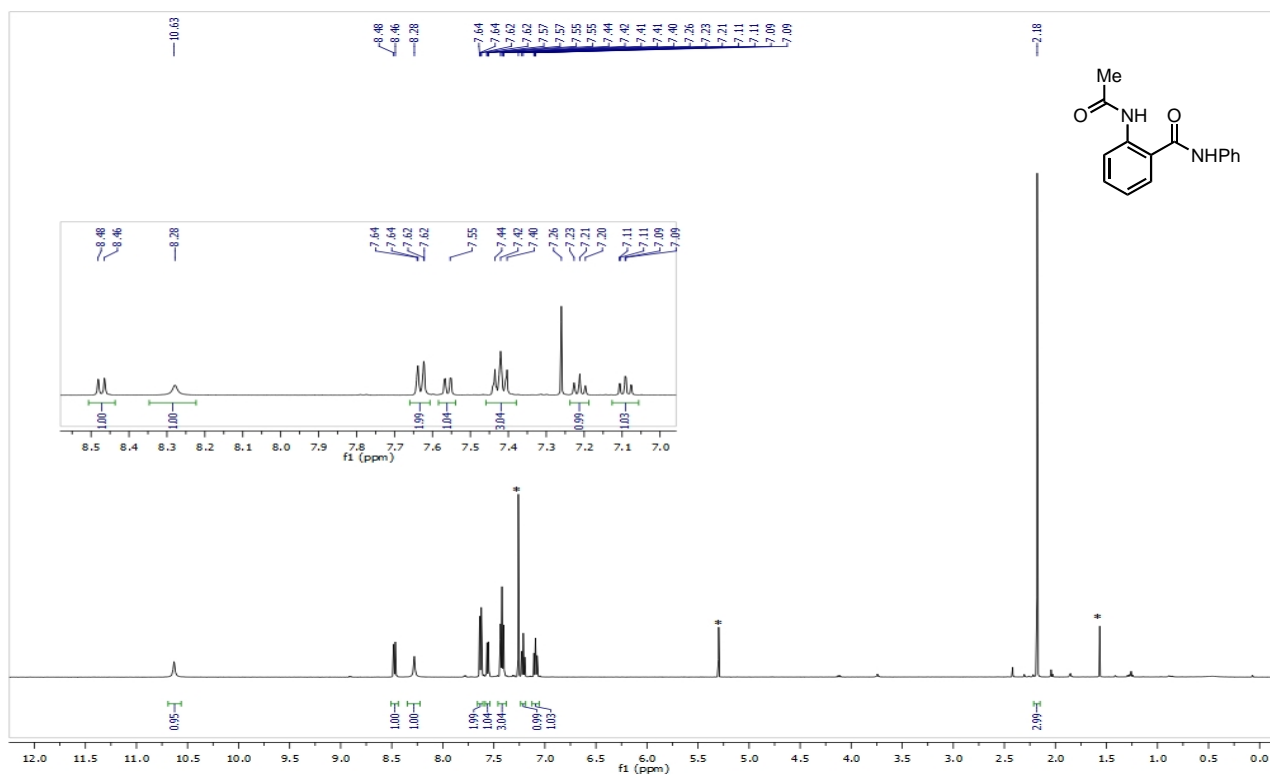

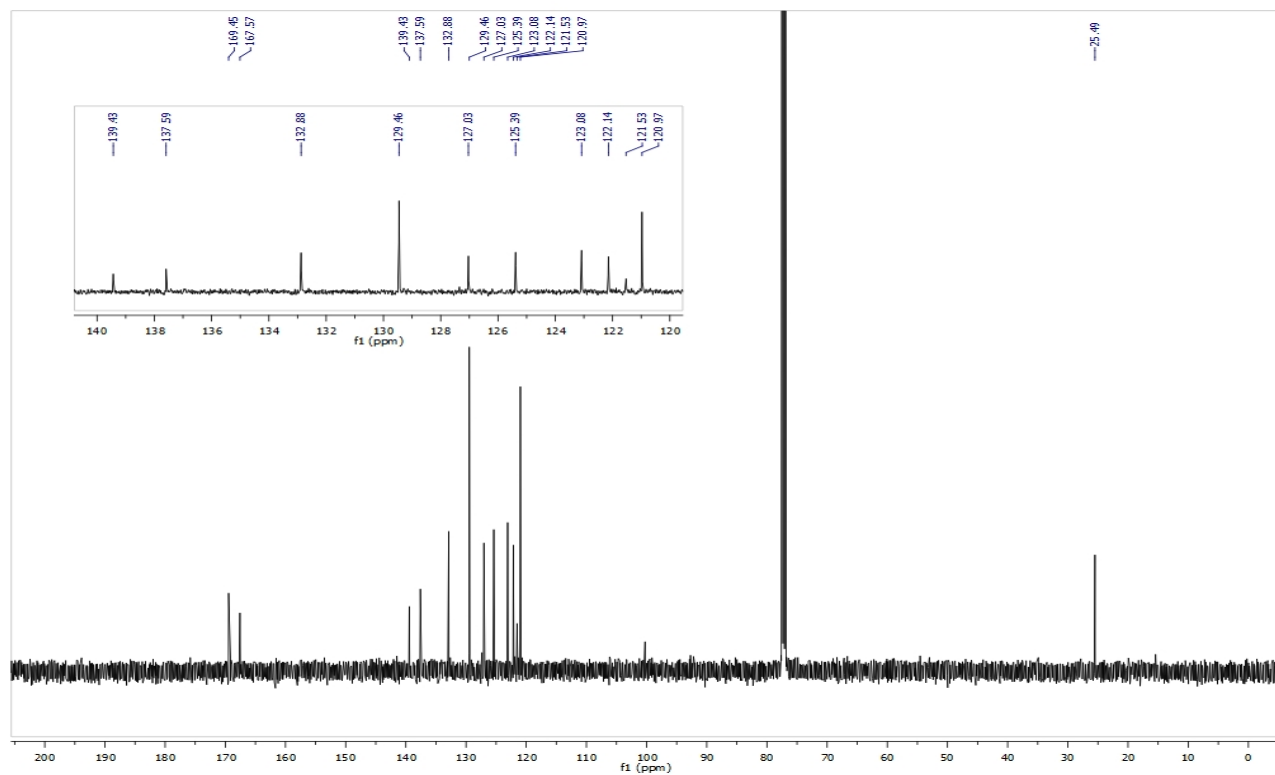

Table 2, **3i**:

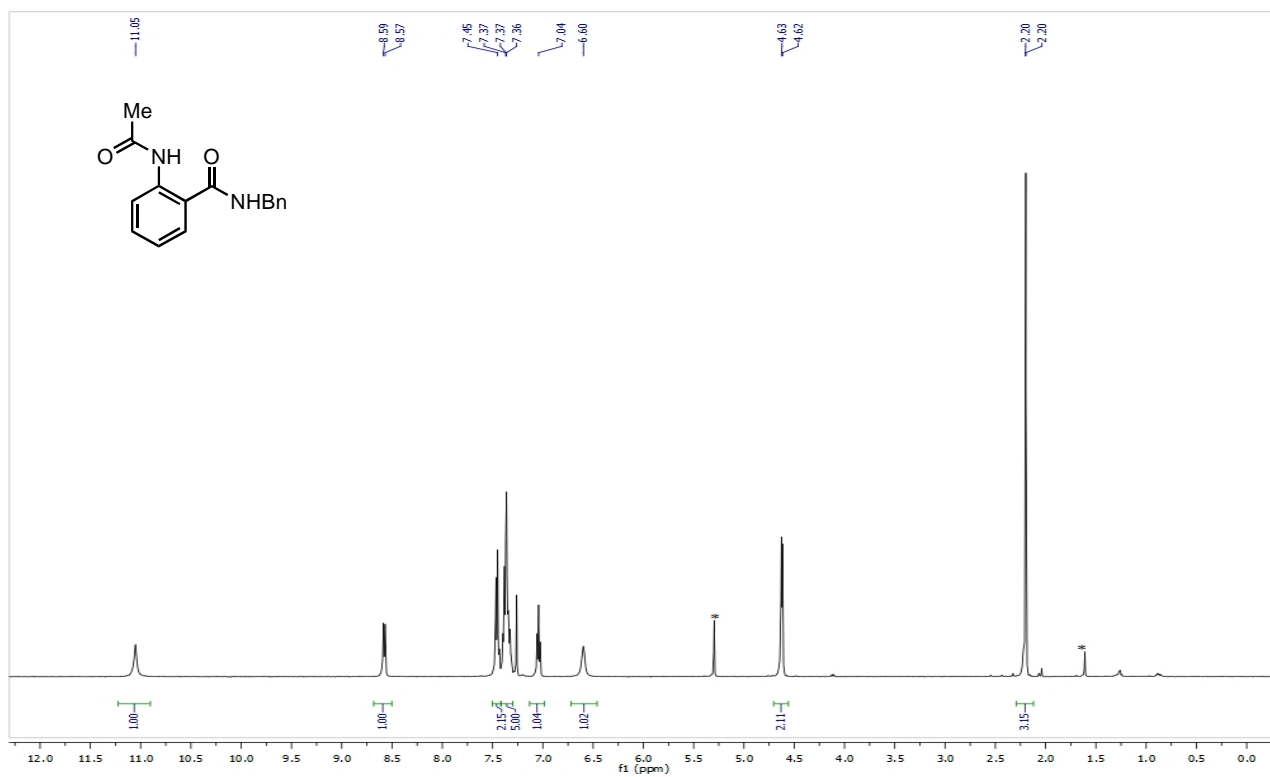

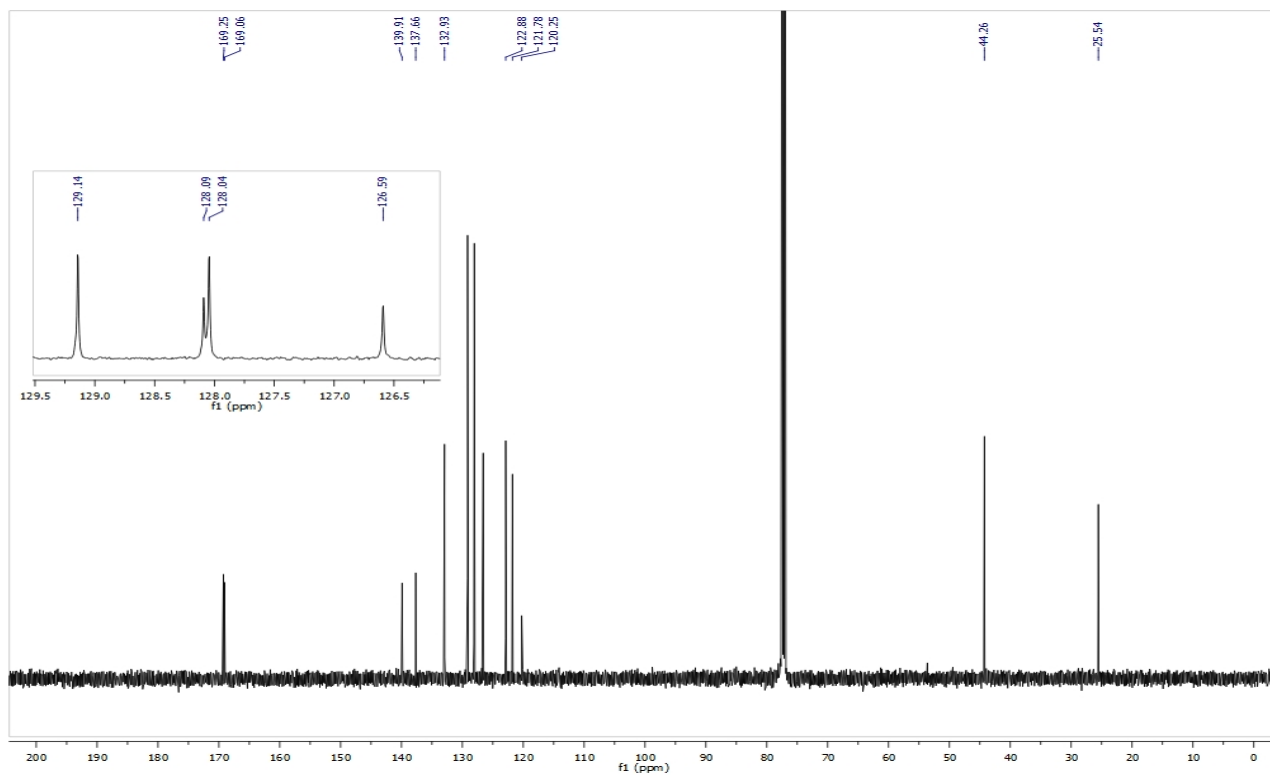

Table 2, **3j**:

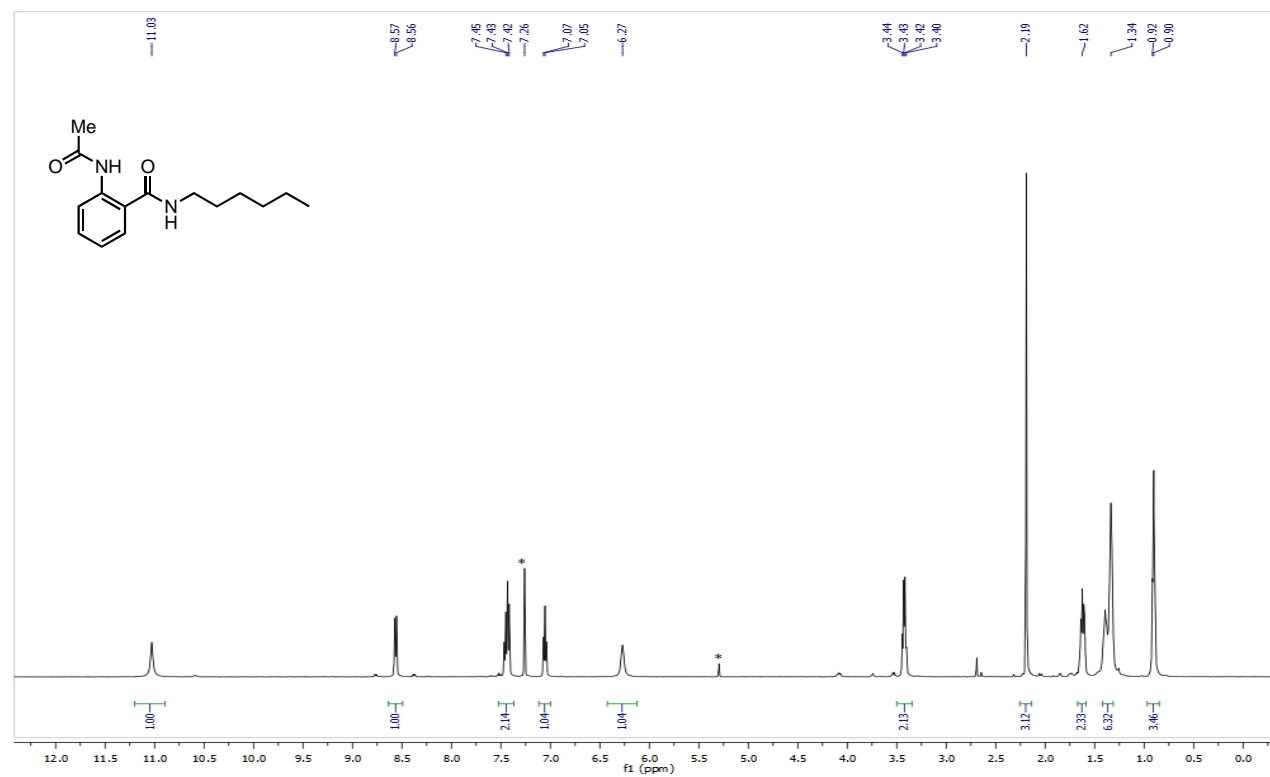

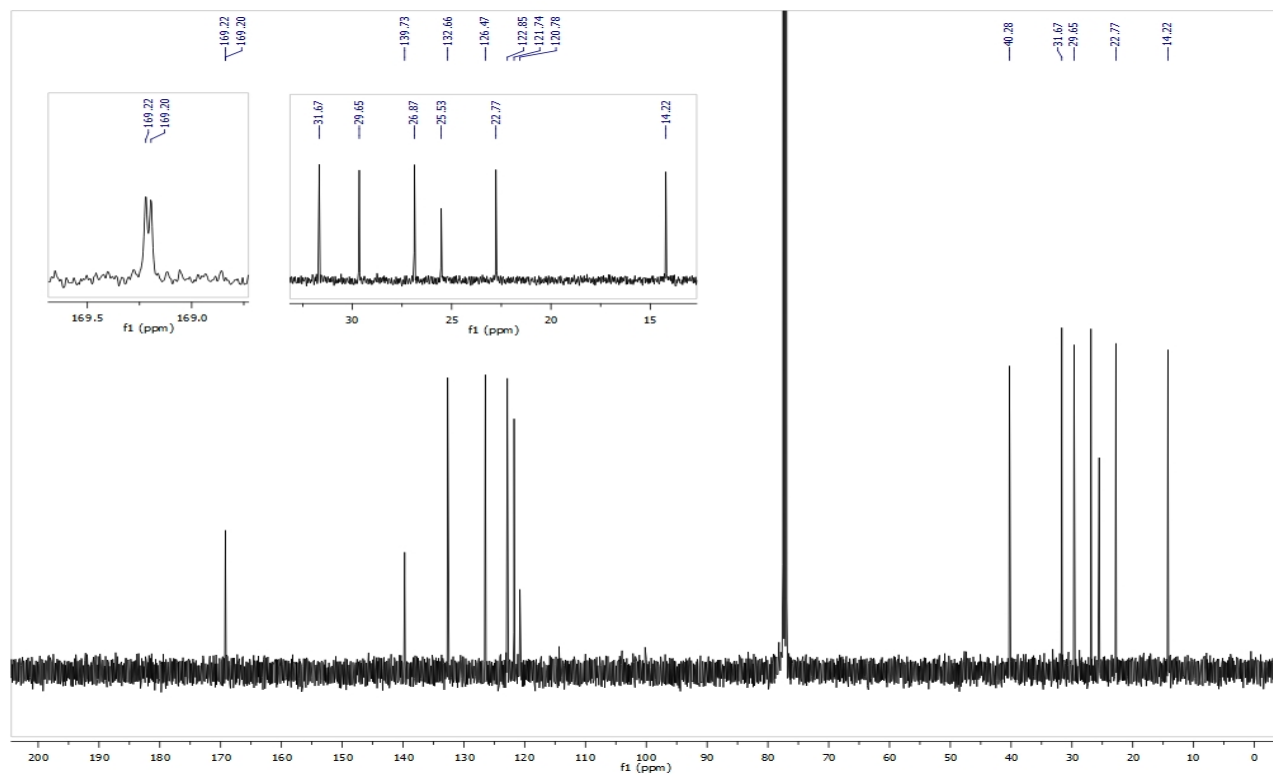

Table 2, **3k**:

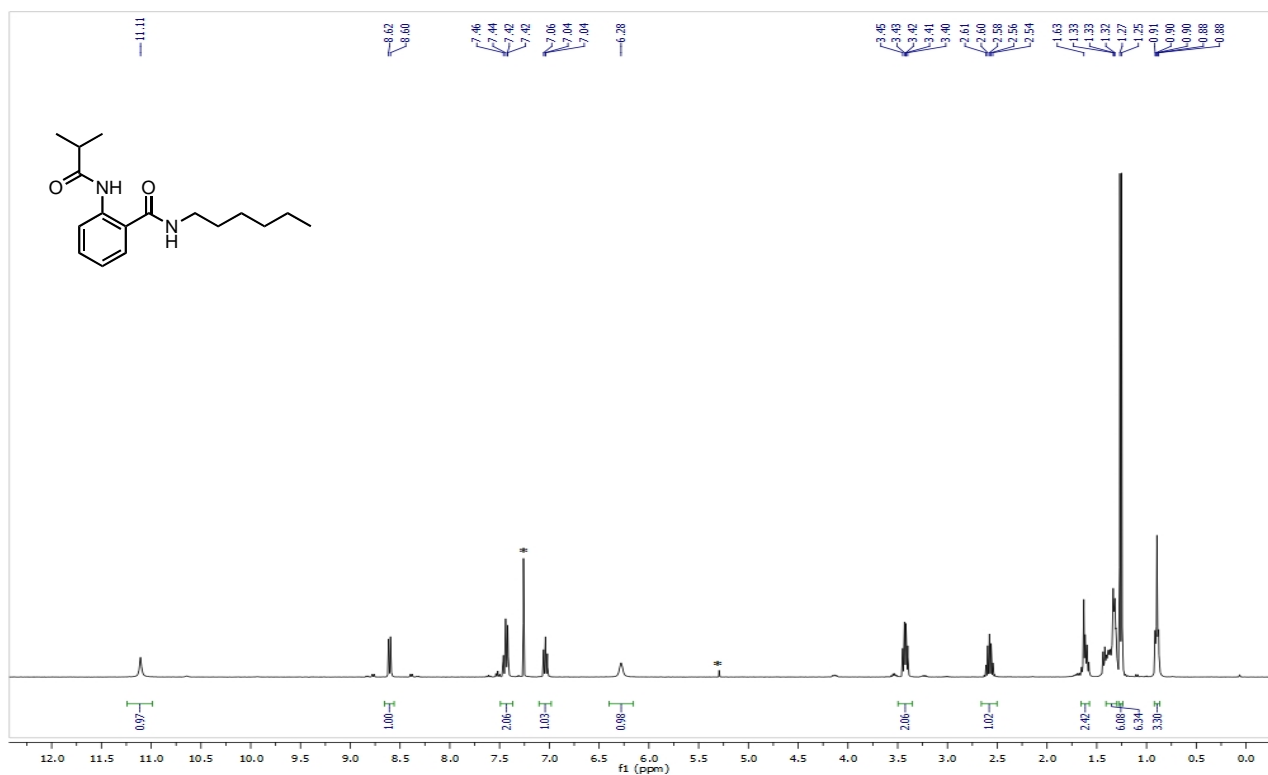

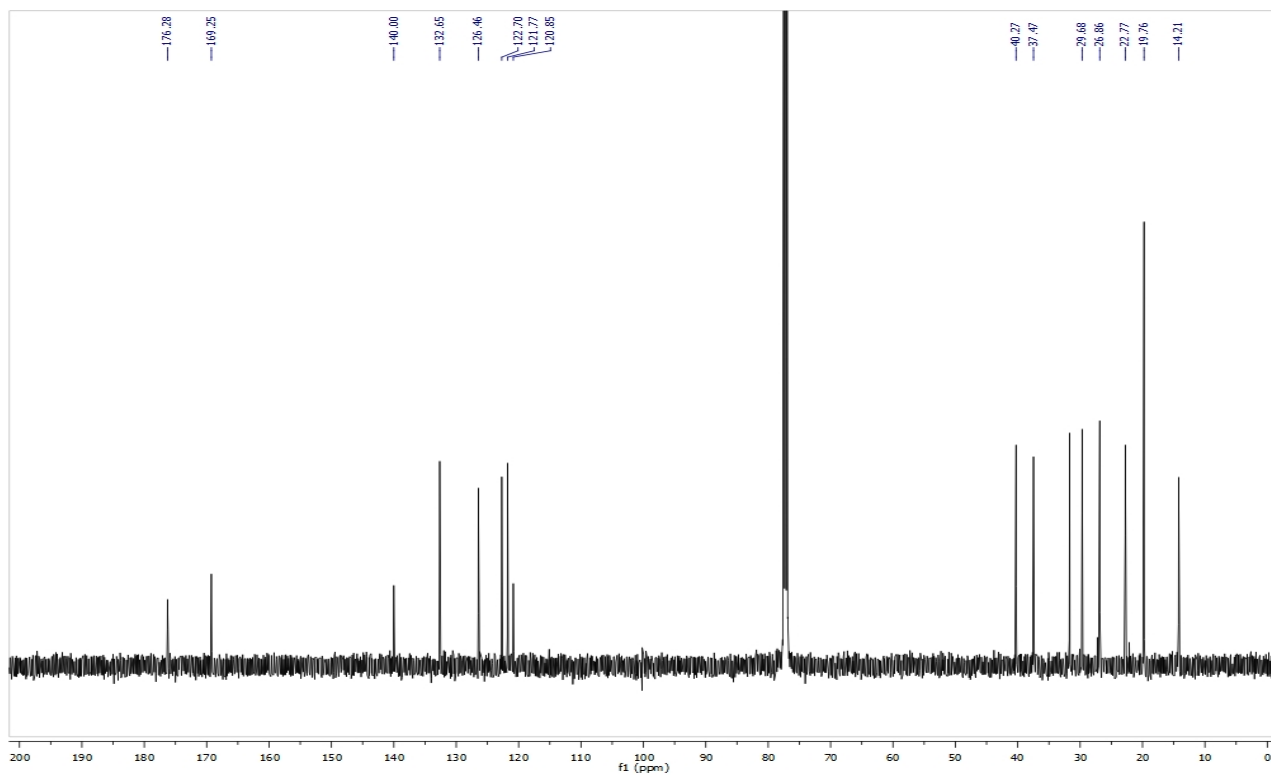

Table 2, **3I**:

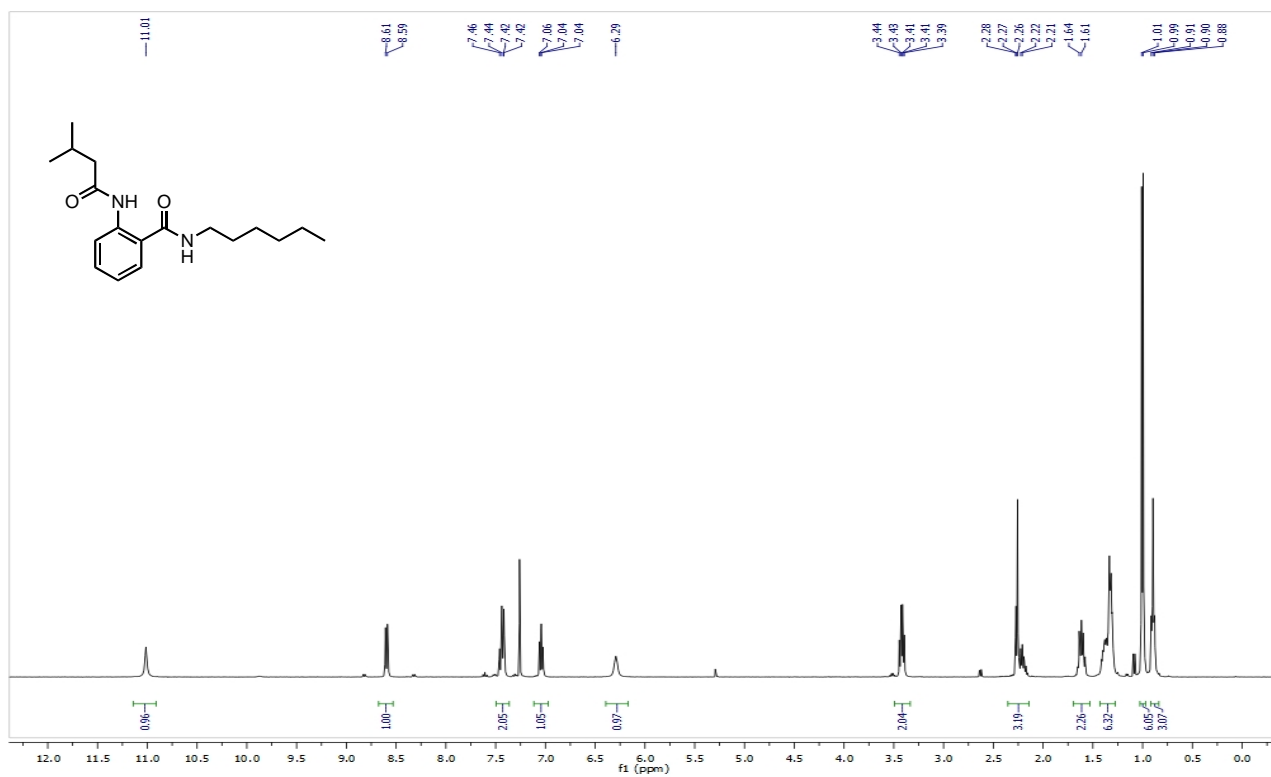

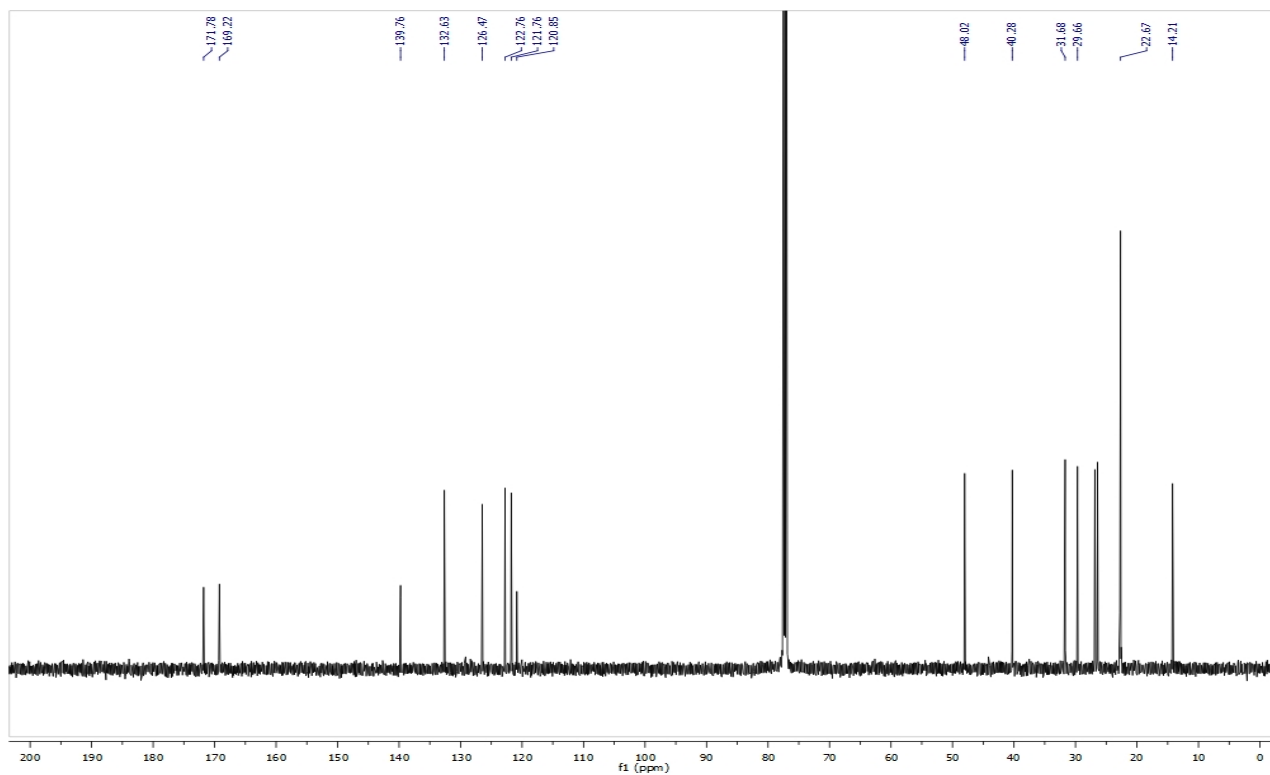

Table 2, **3m**:

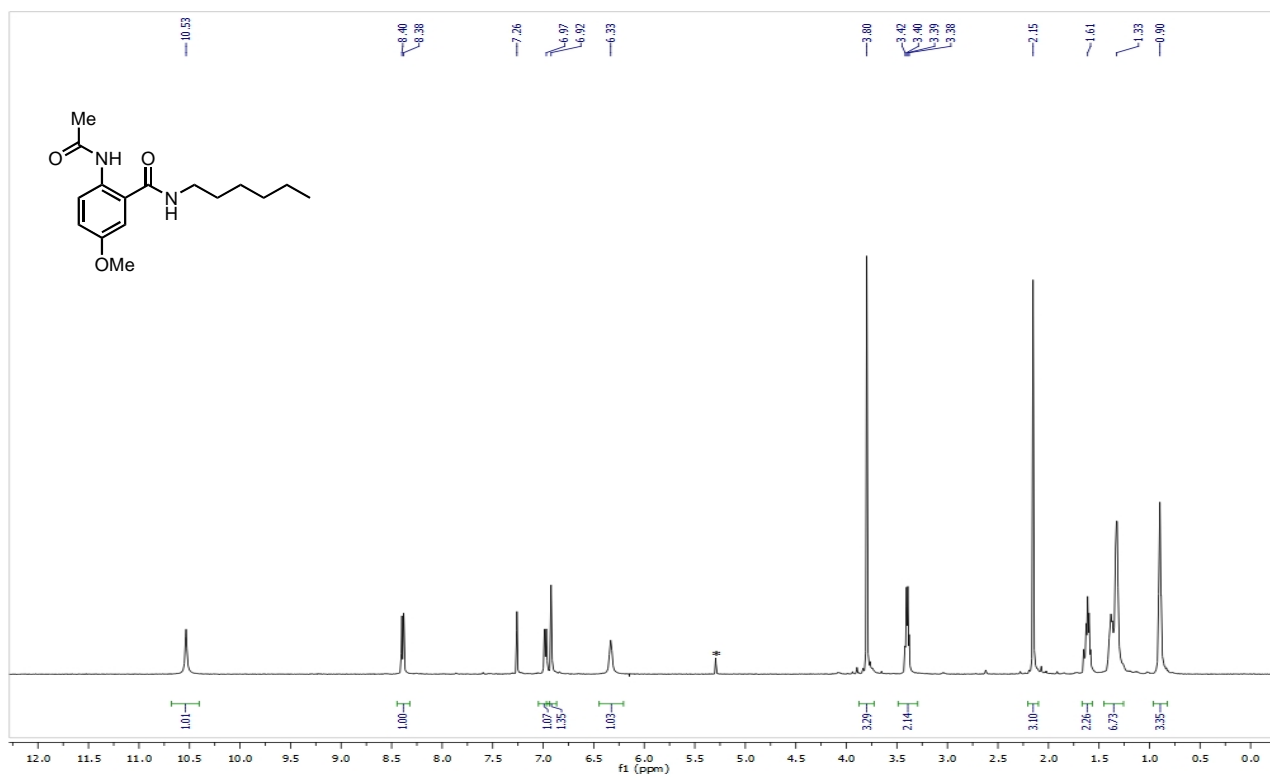

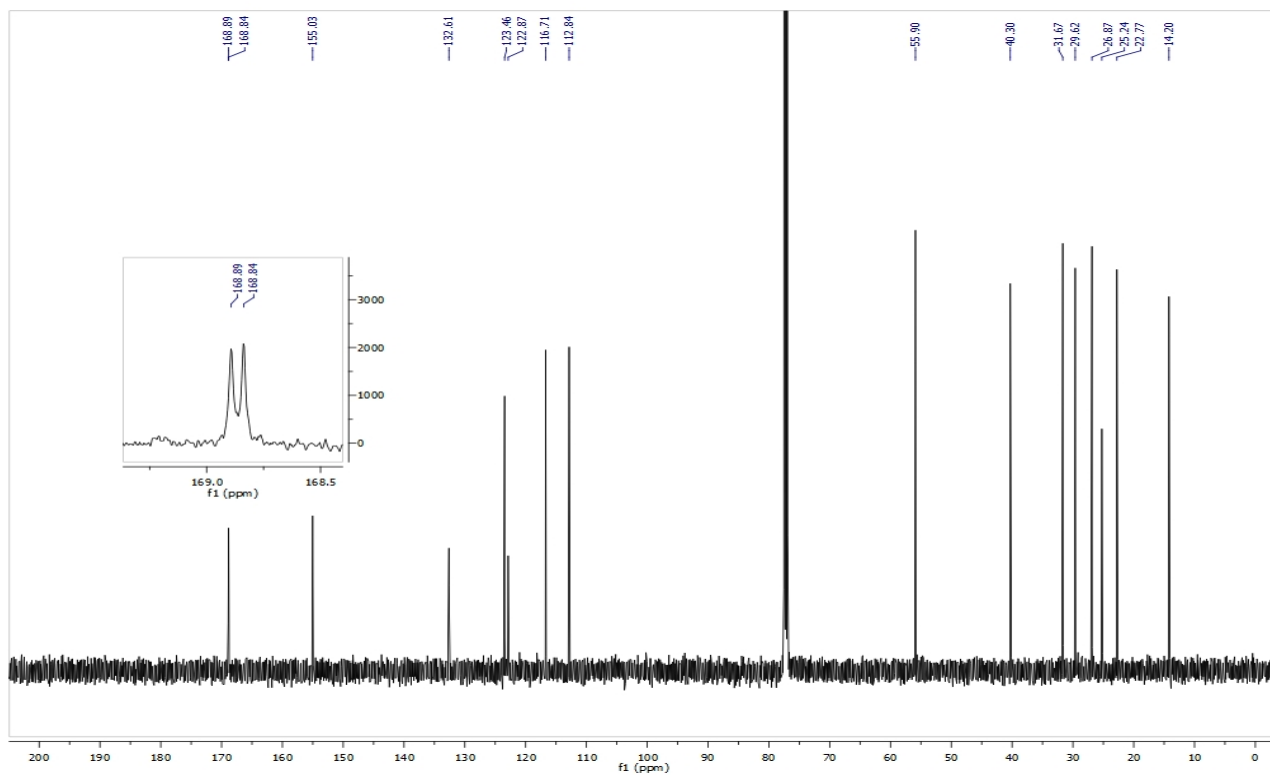

Table 2, **3n**:

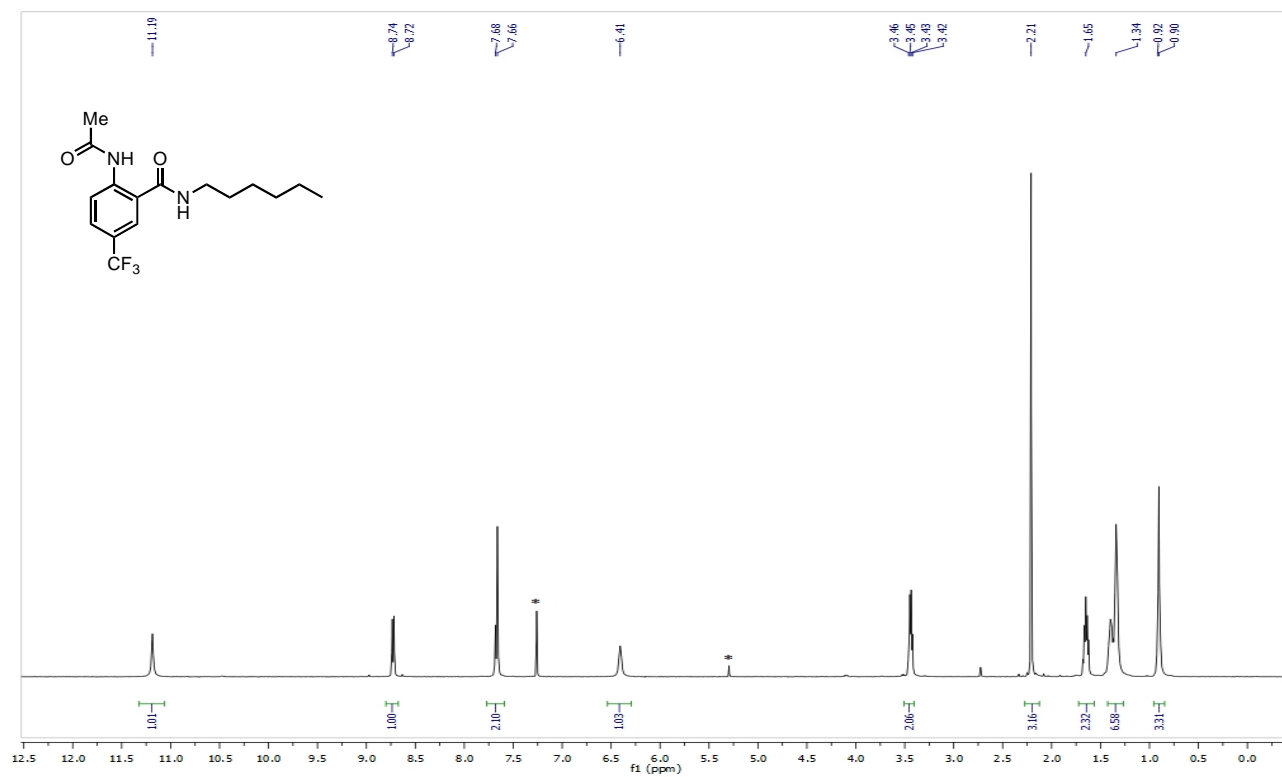

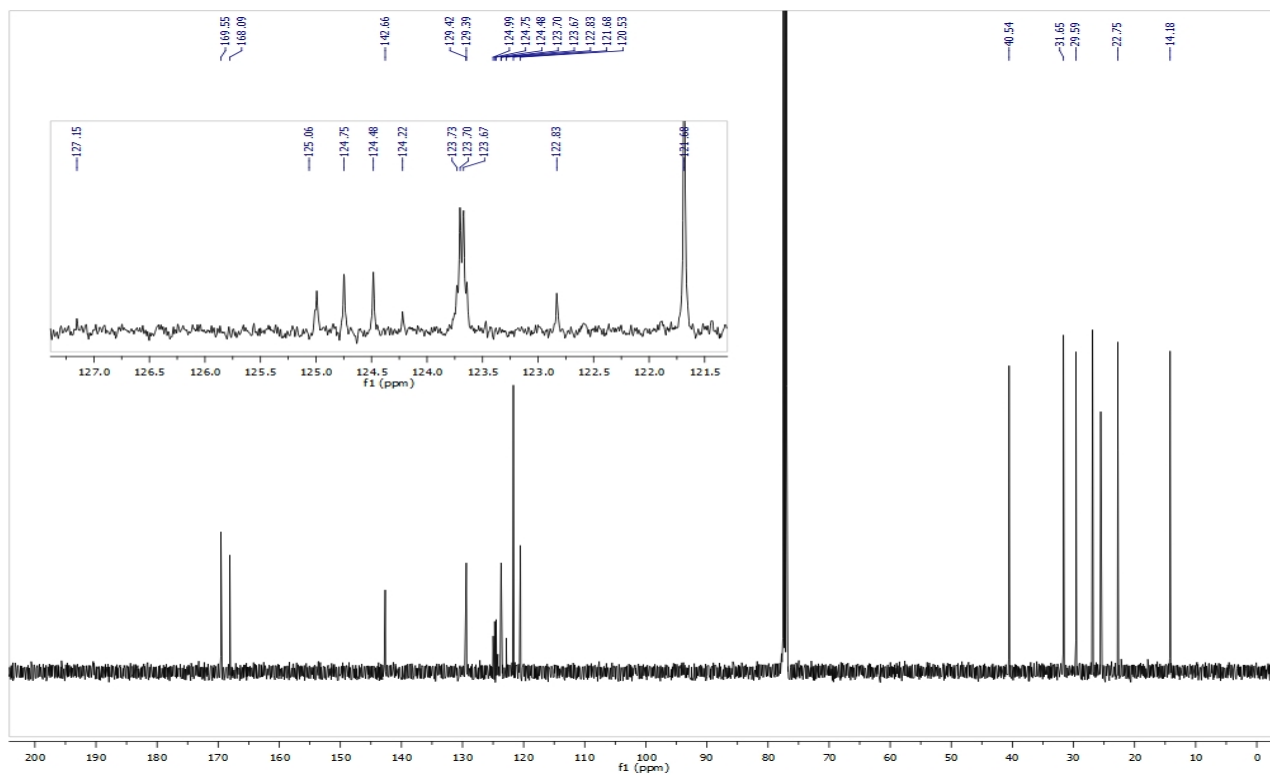

Table 2, **30**:

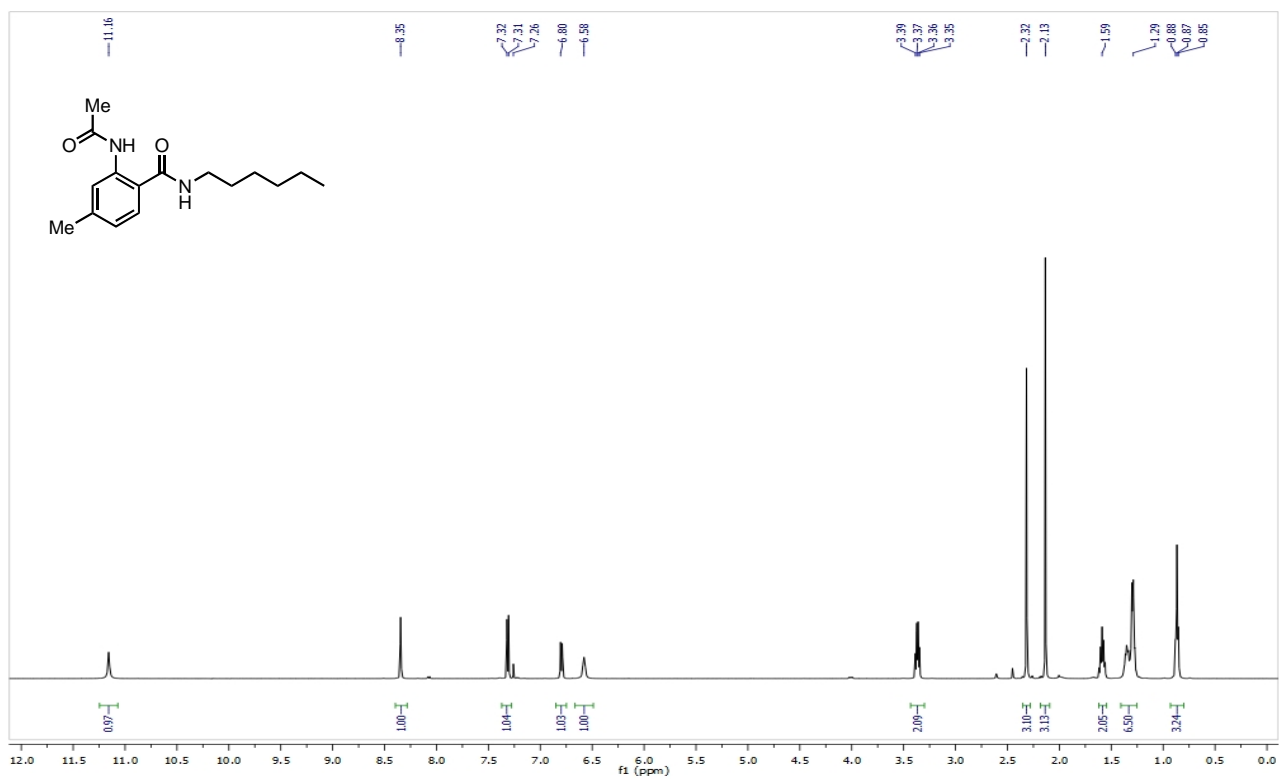

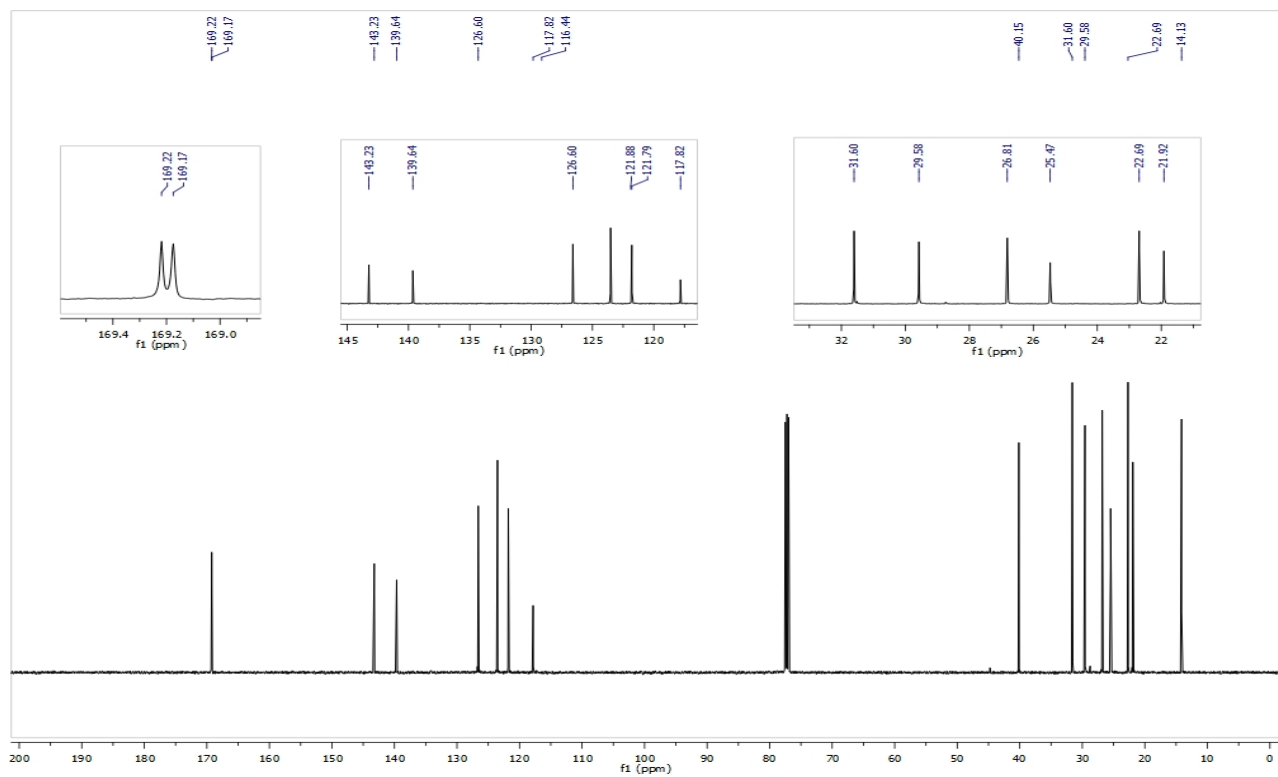

Table 2, **3p**:

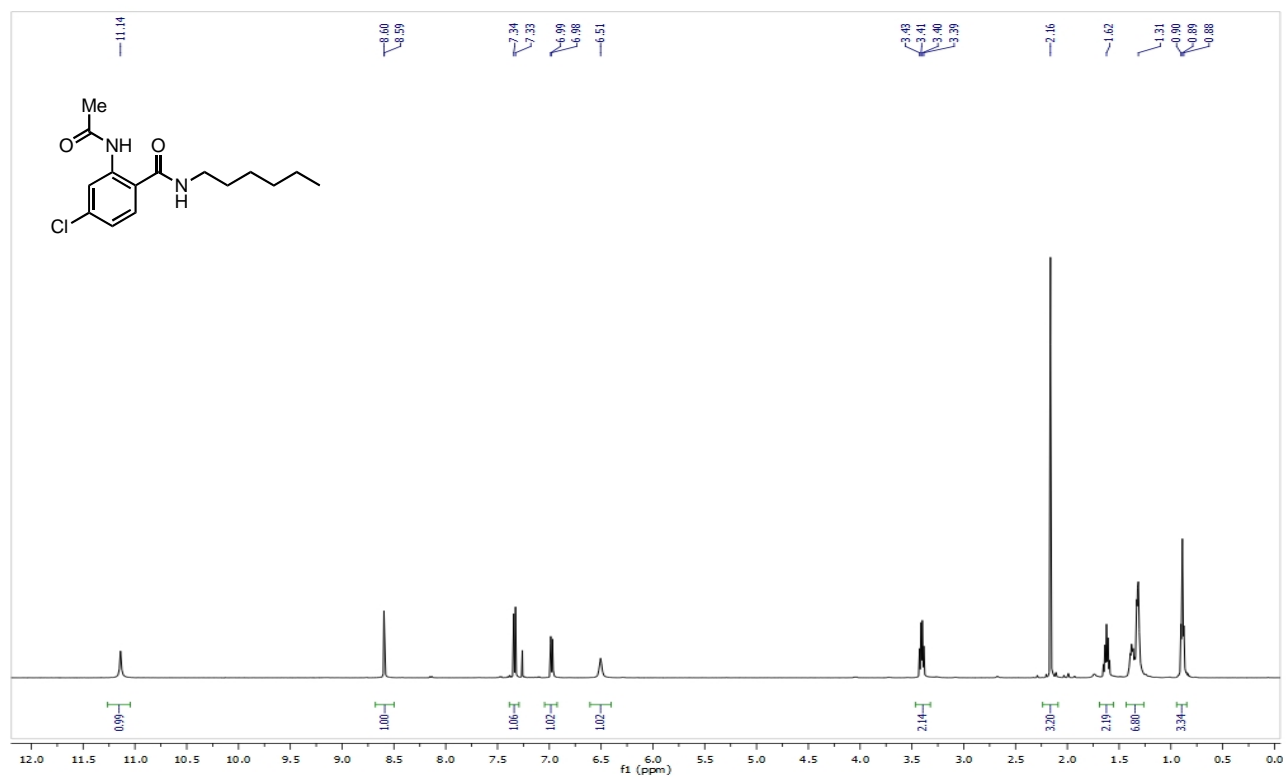

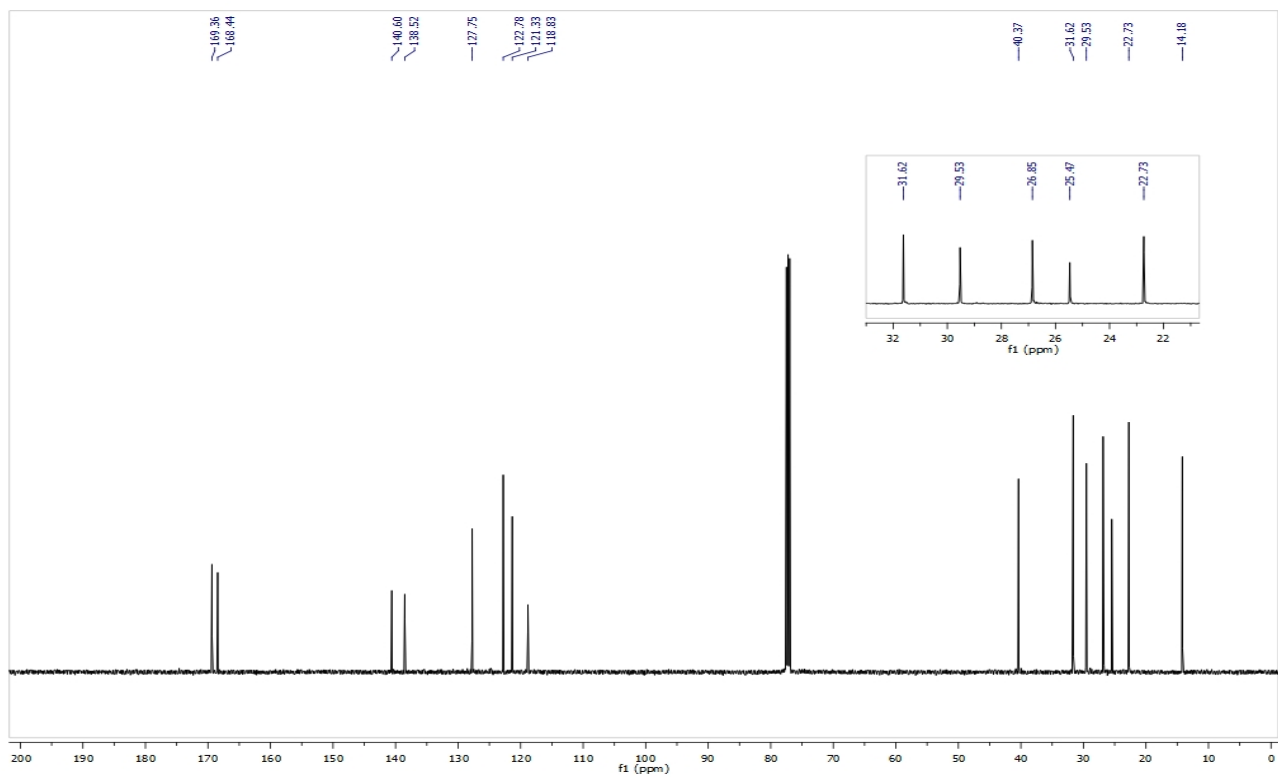

Table 2, **3q**:

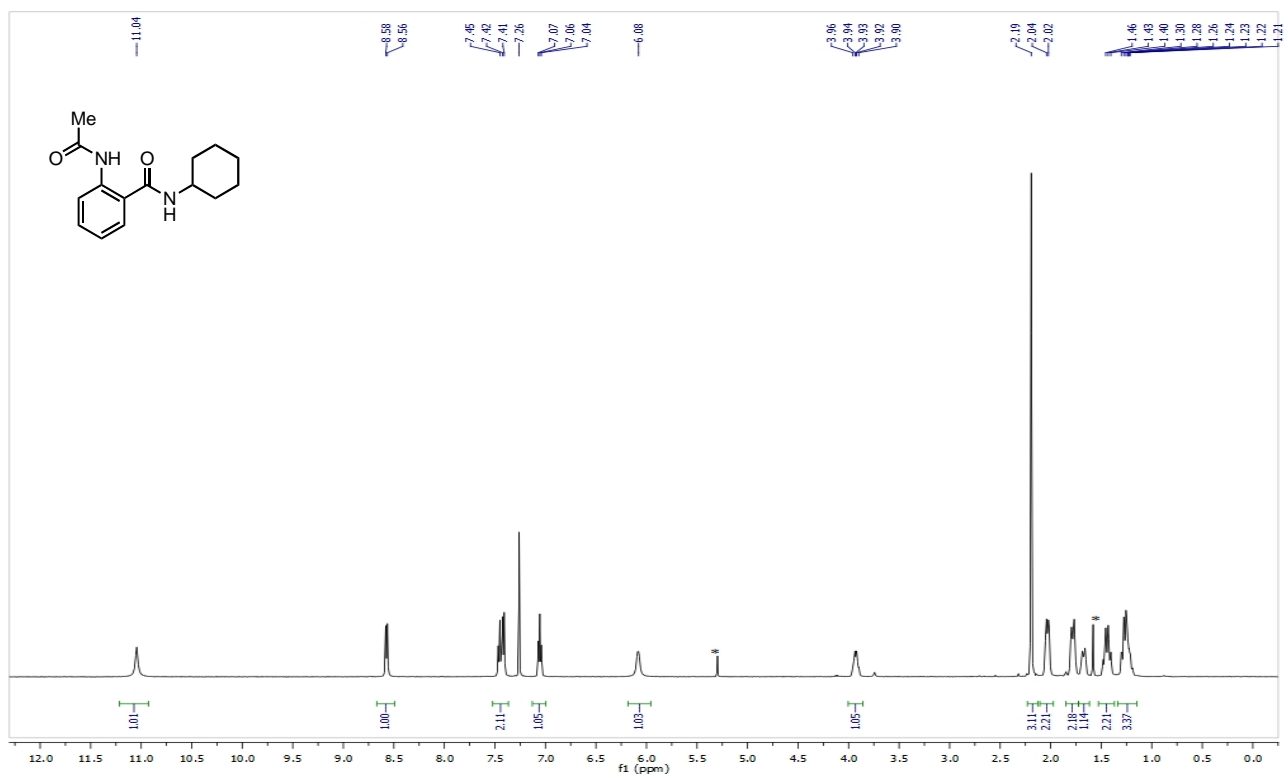

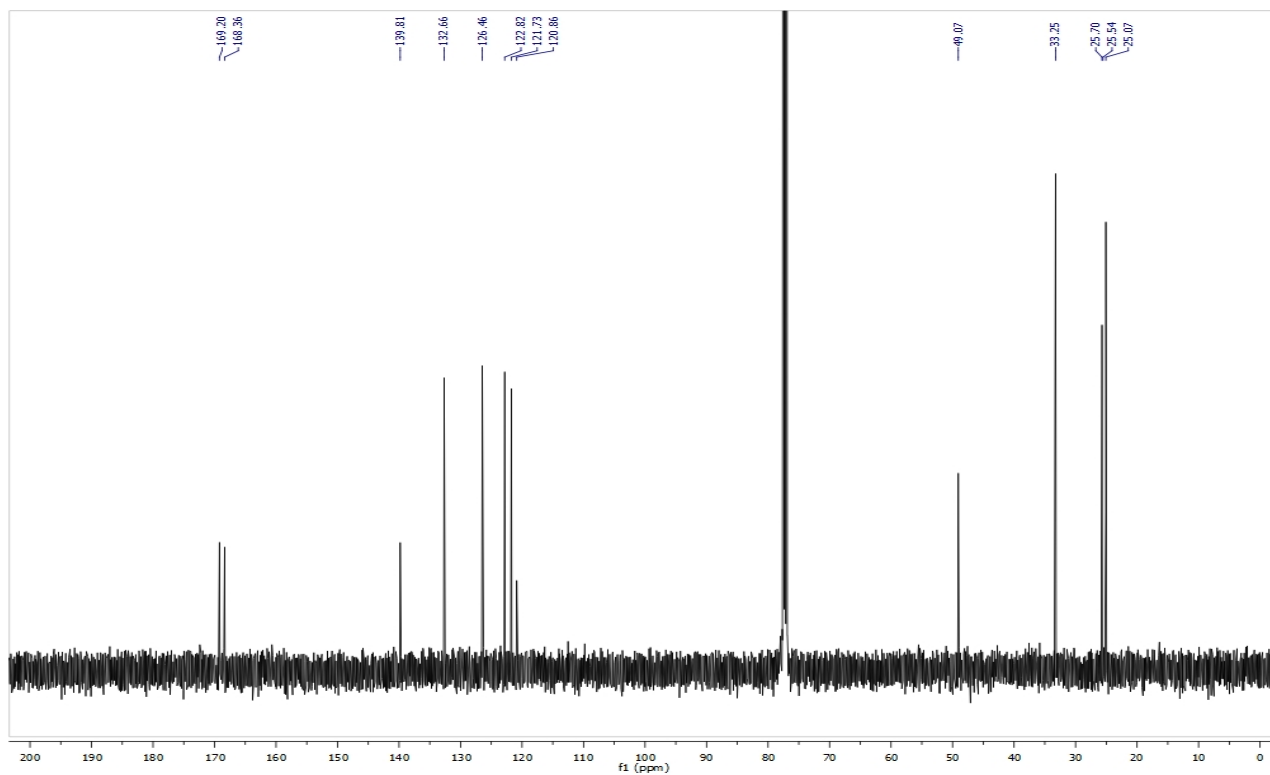

Table 2, **3r**:

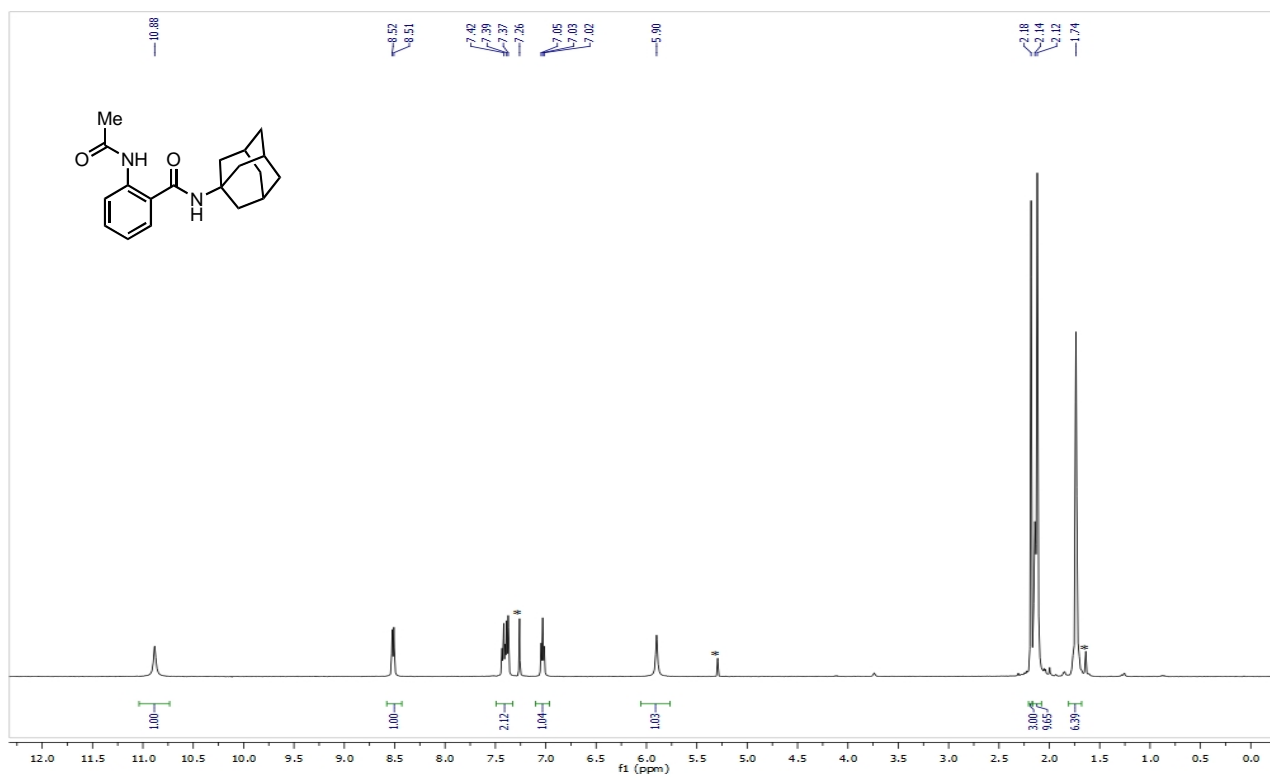

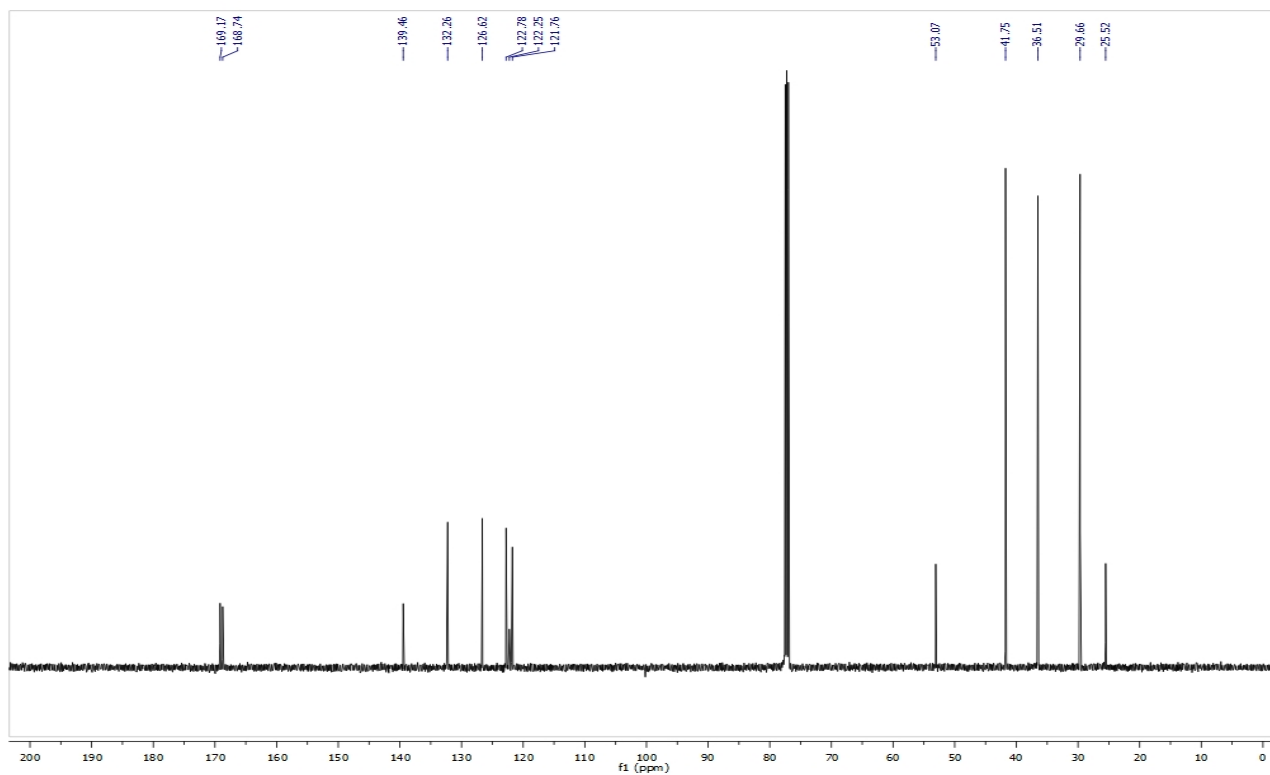

Table 2, **3sa**:

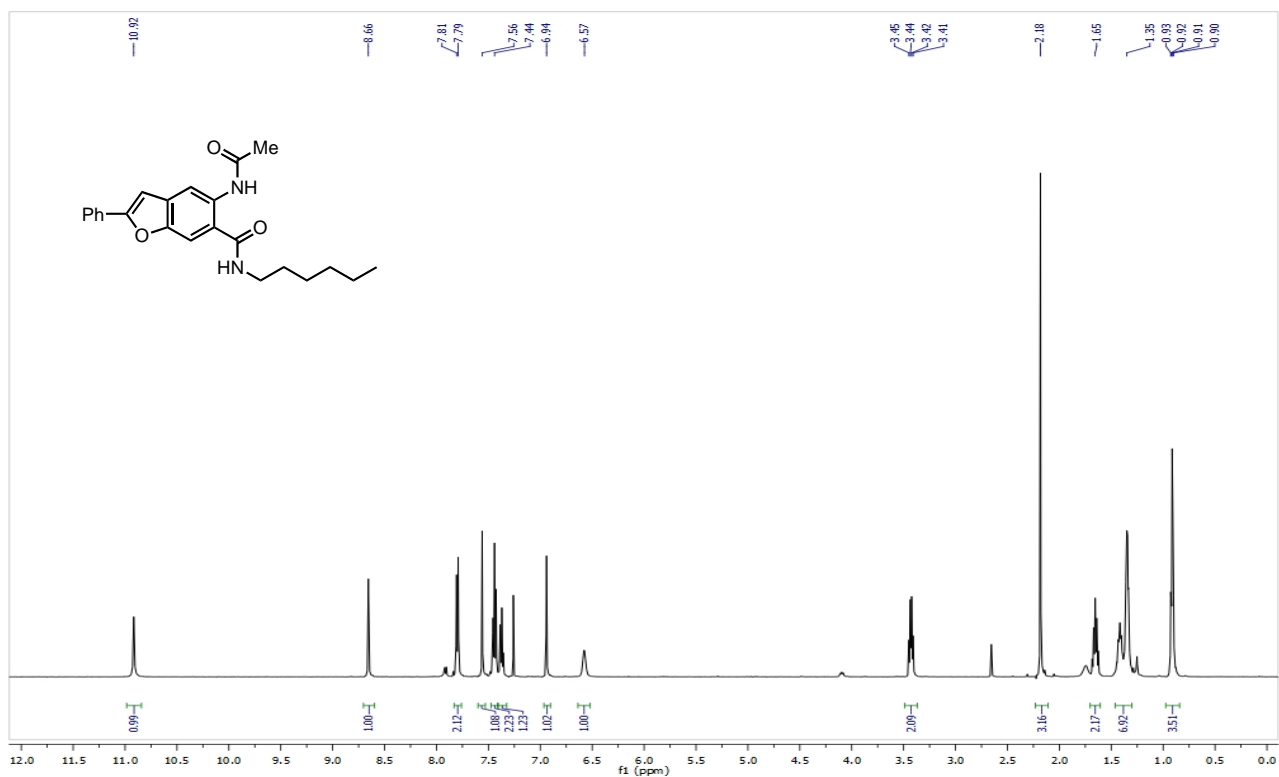

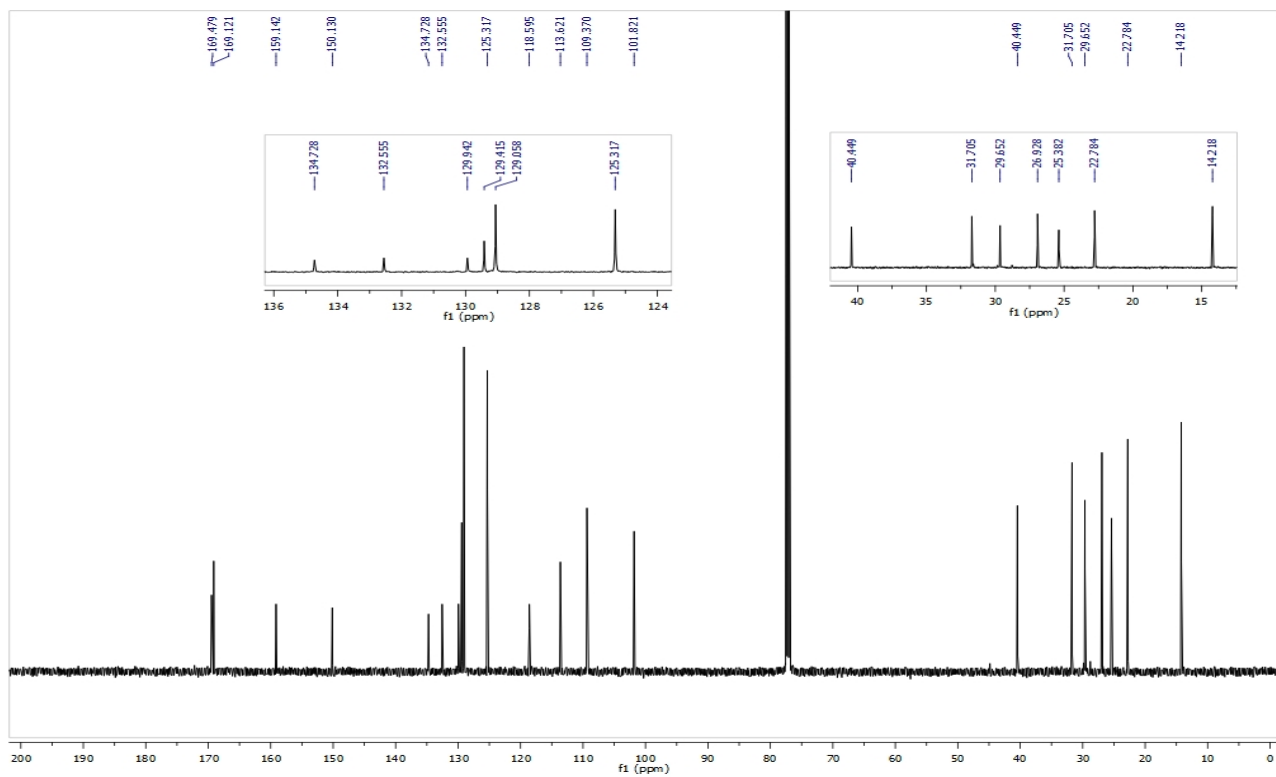

Table 2, **3sb**:

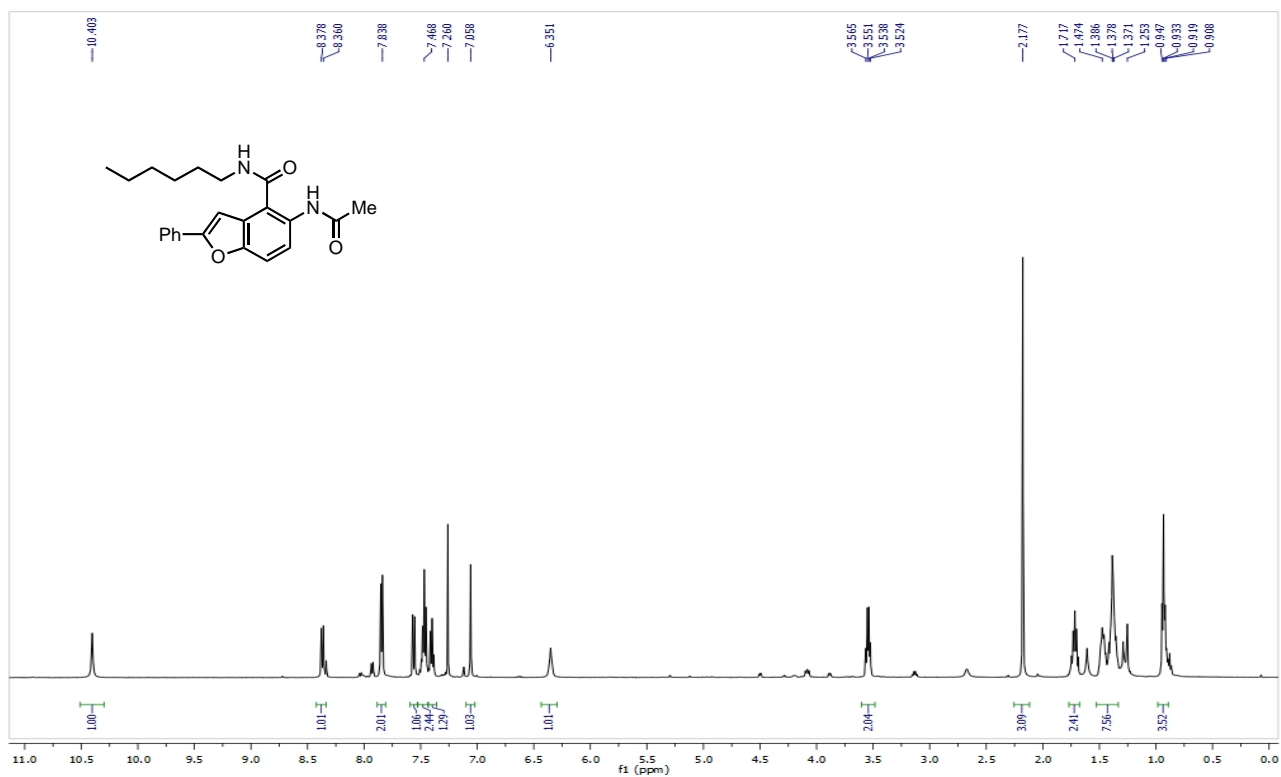

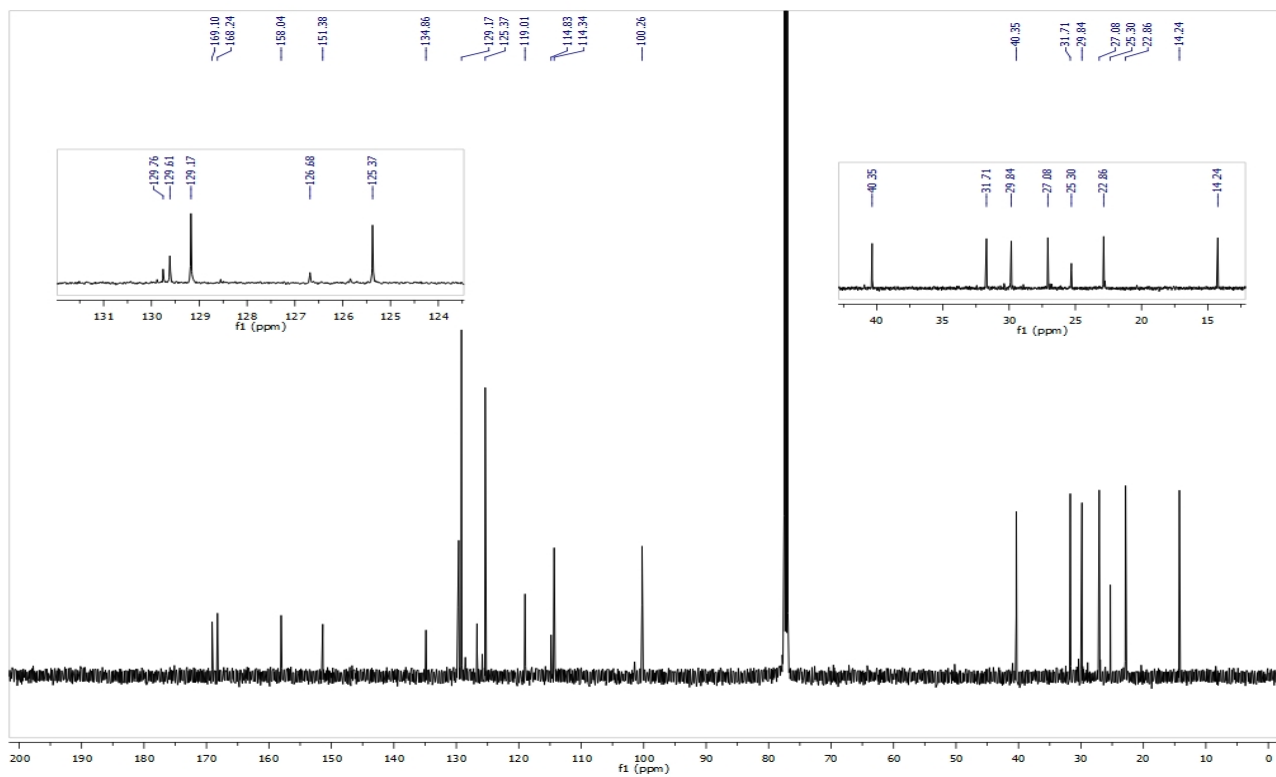

Table 2, **3t**:

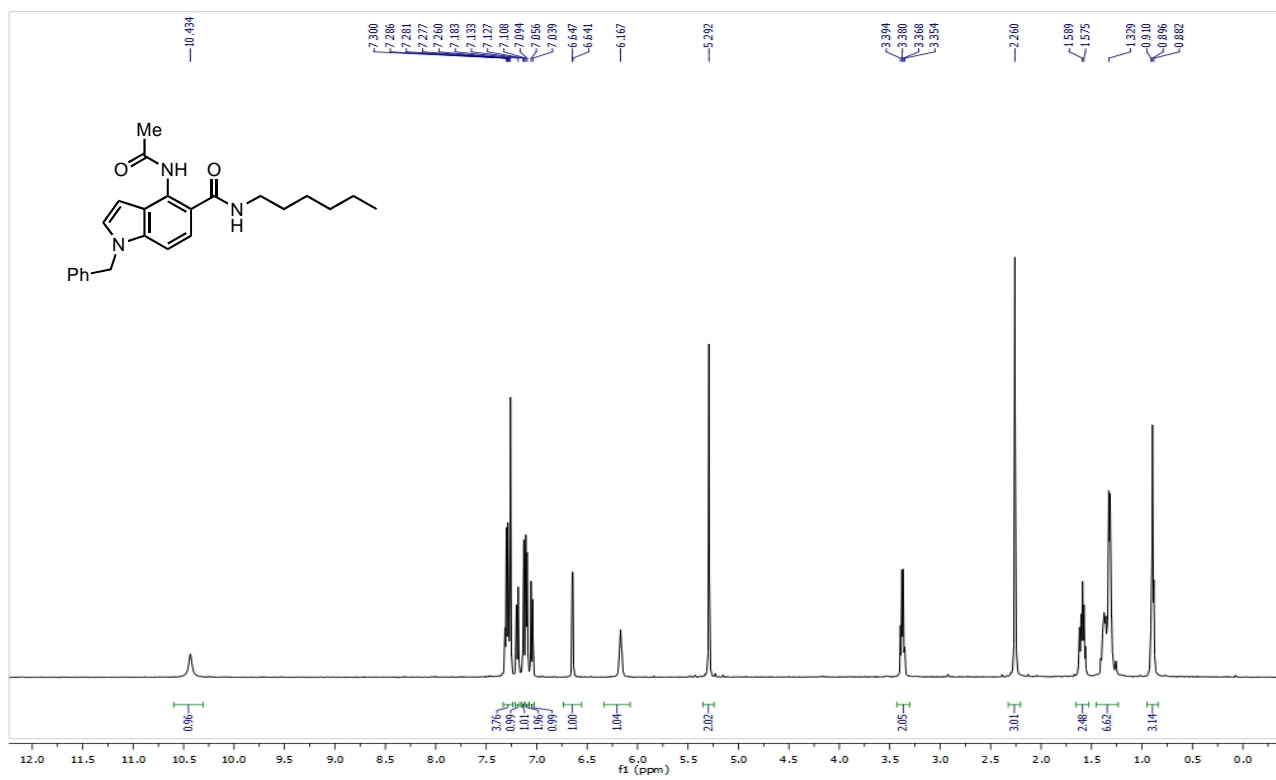

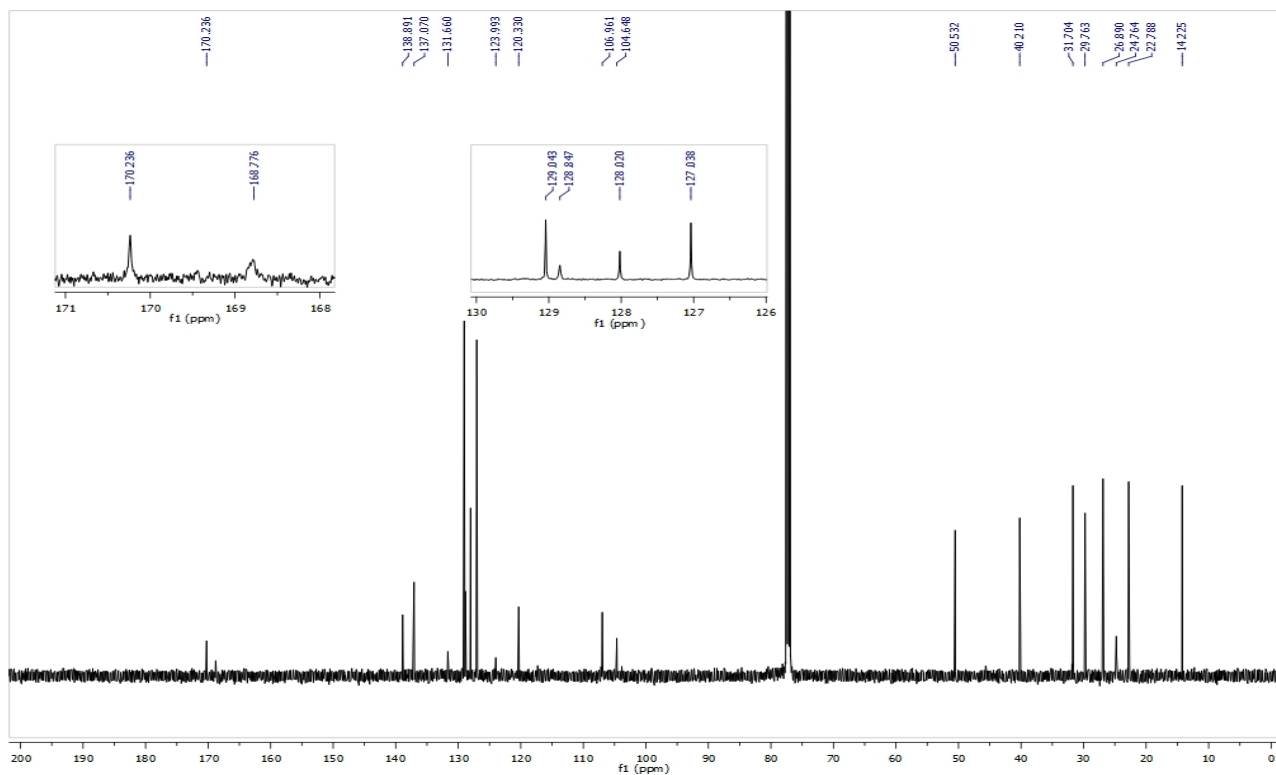

Equation 2, **4a**:

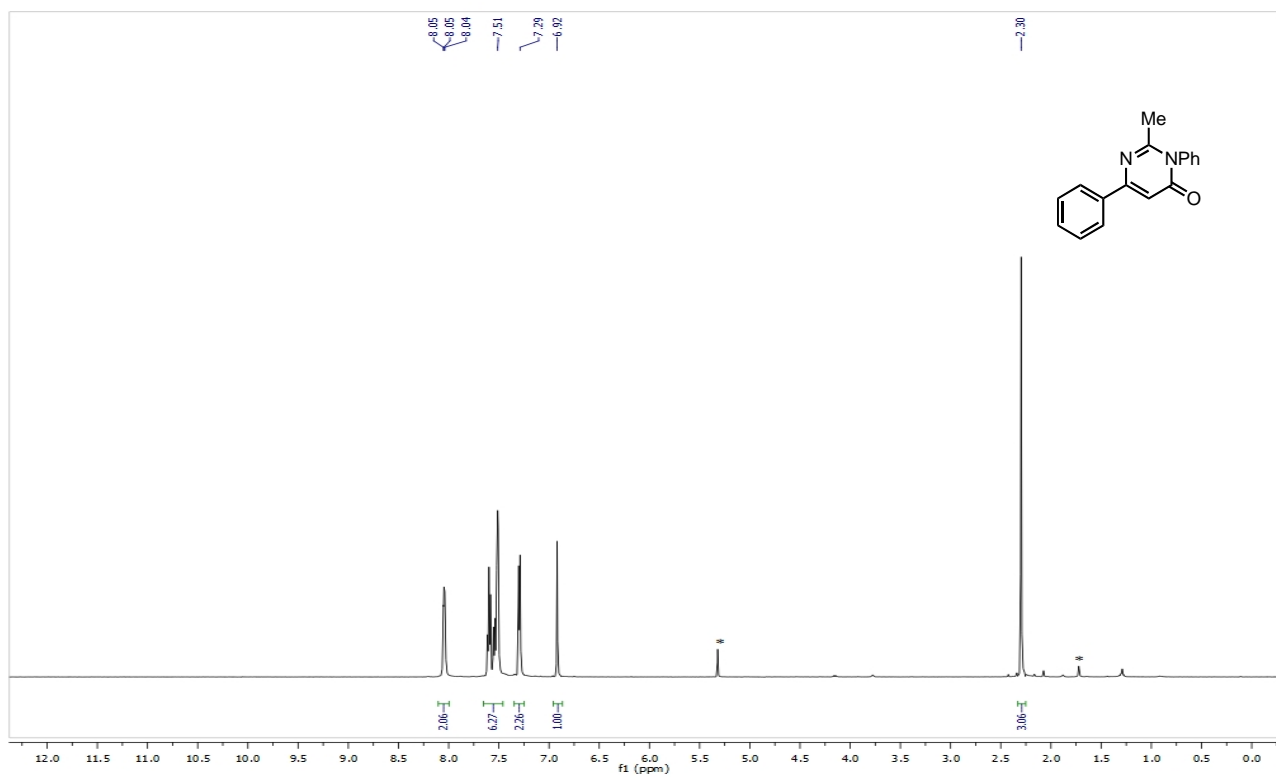

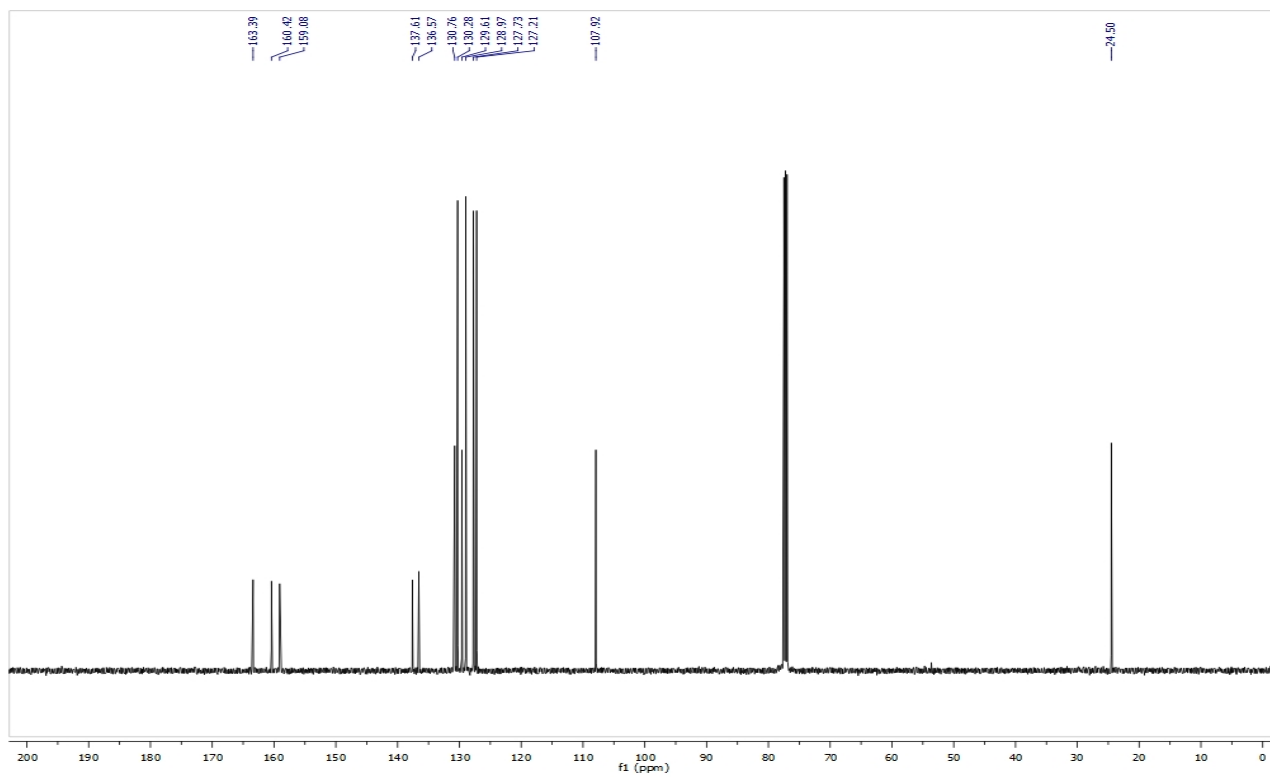

Equation 2, **4b**:

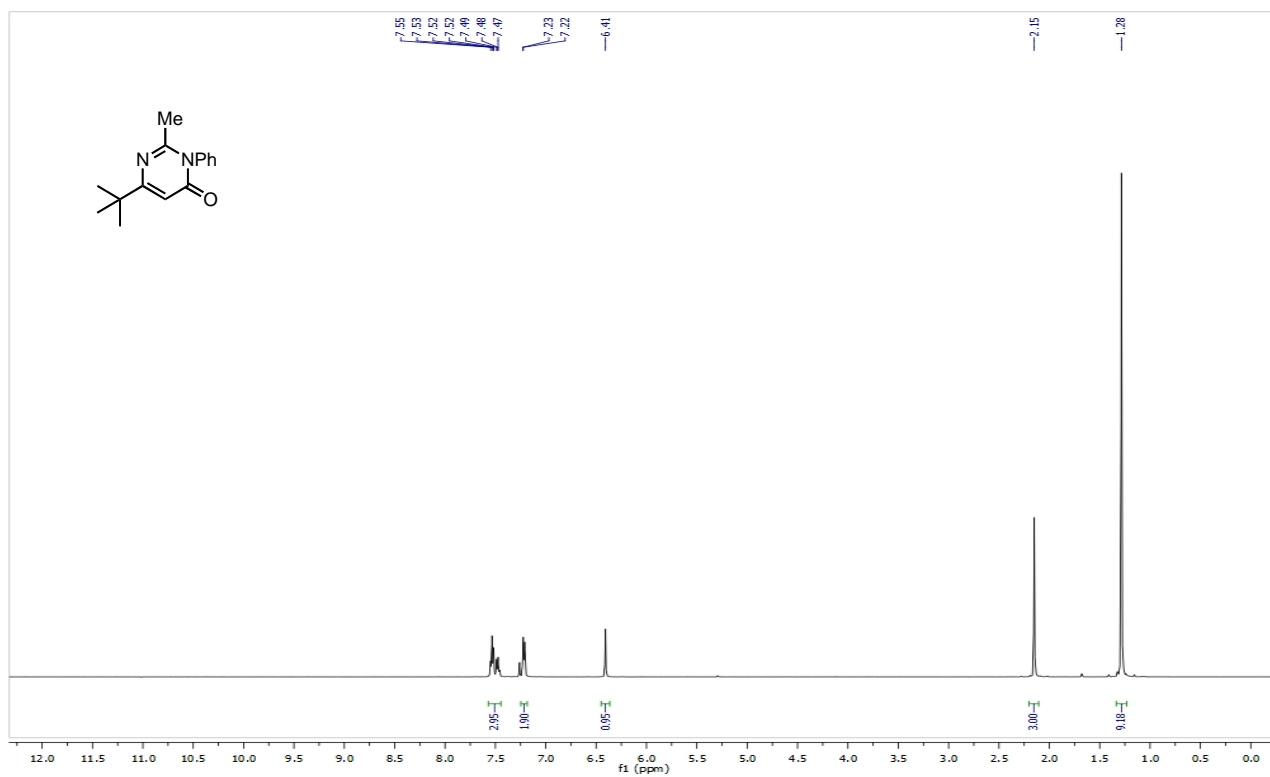

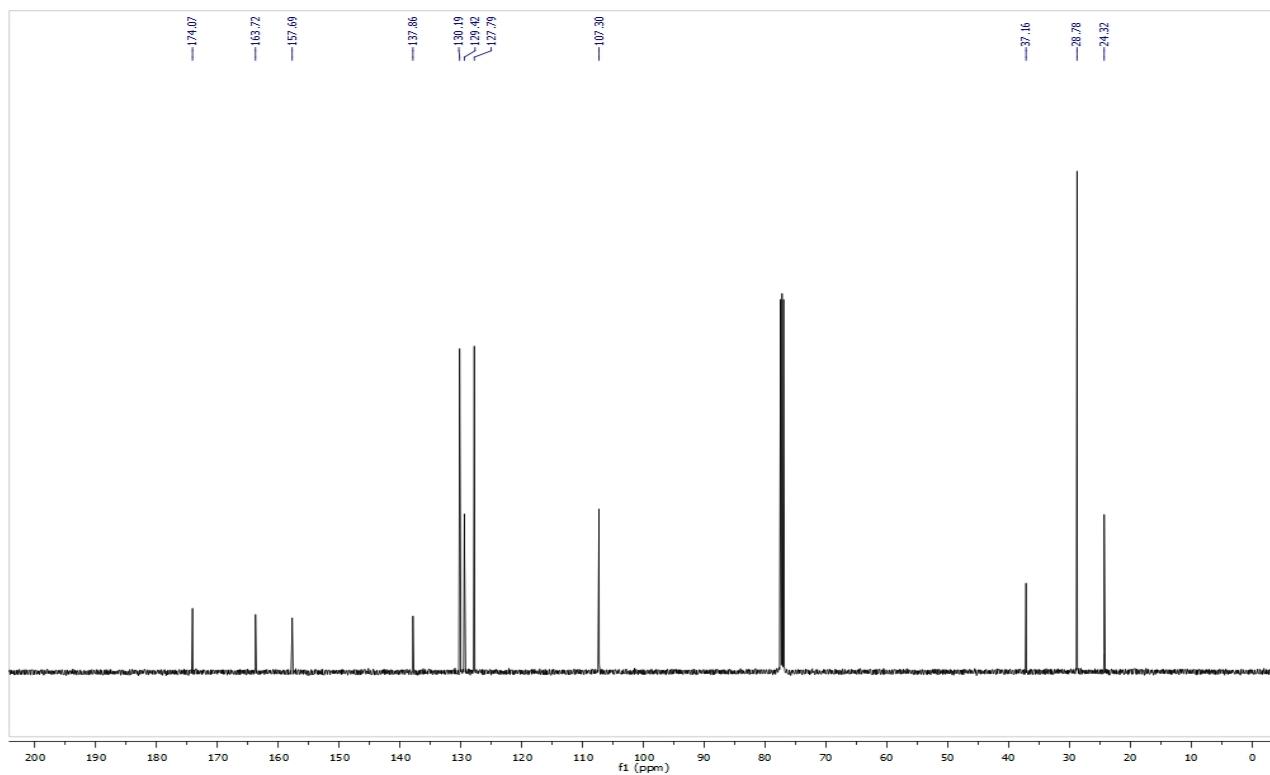

**2c-d<sub>3</sub>:**

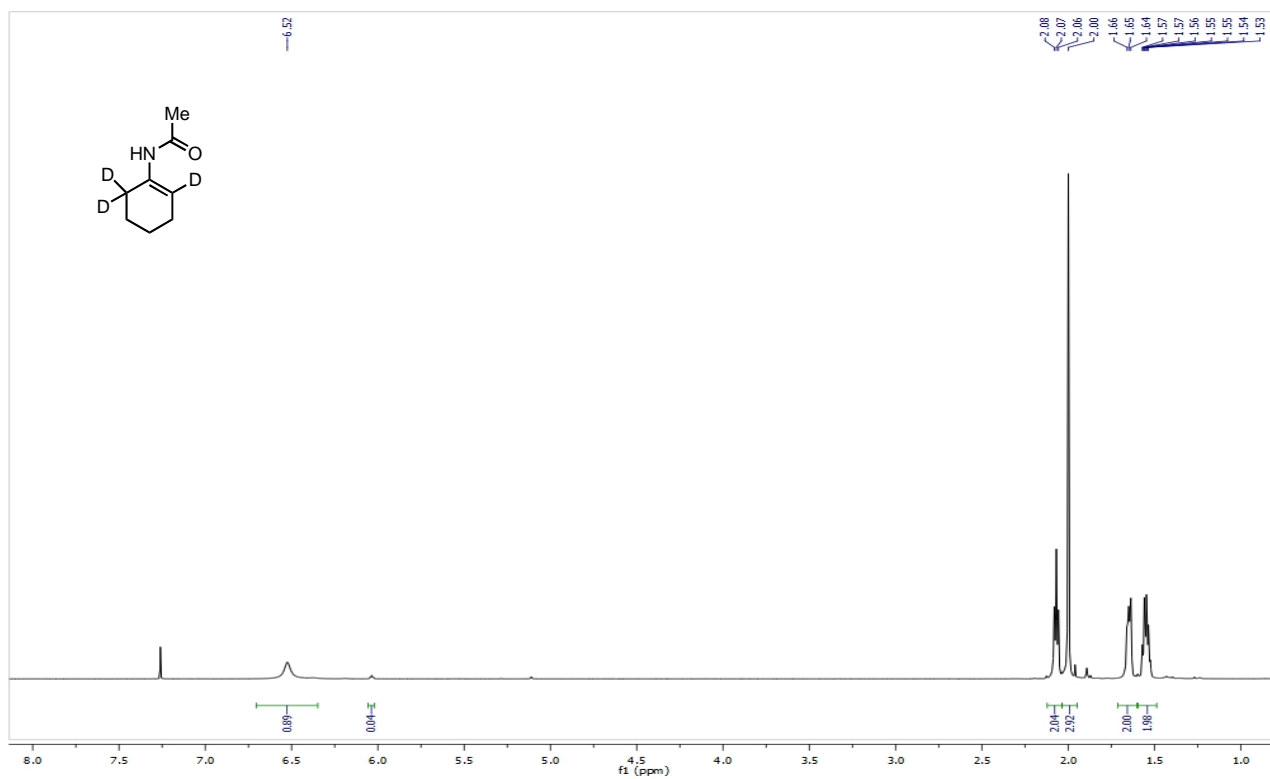

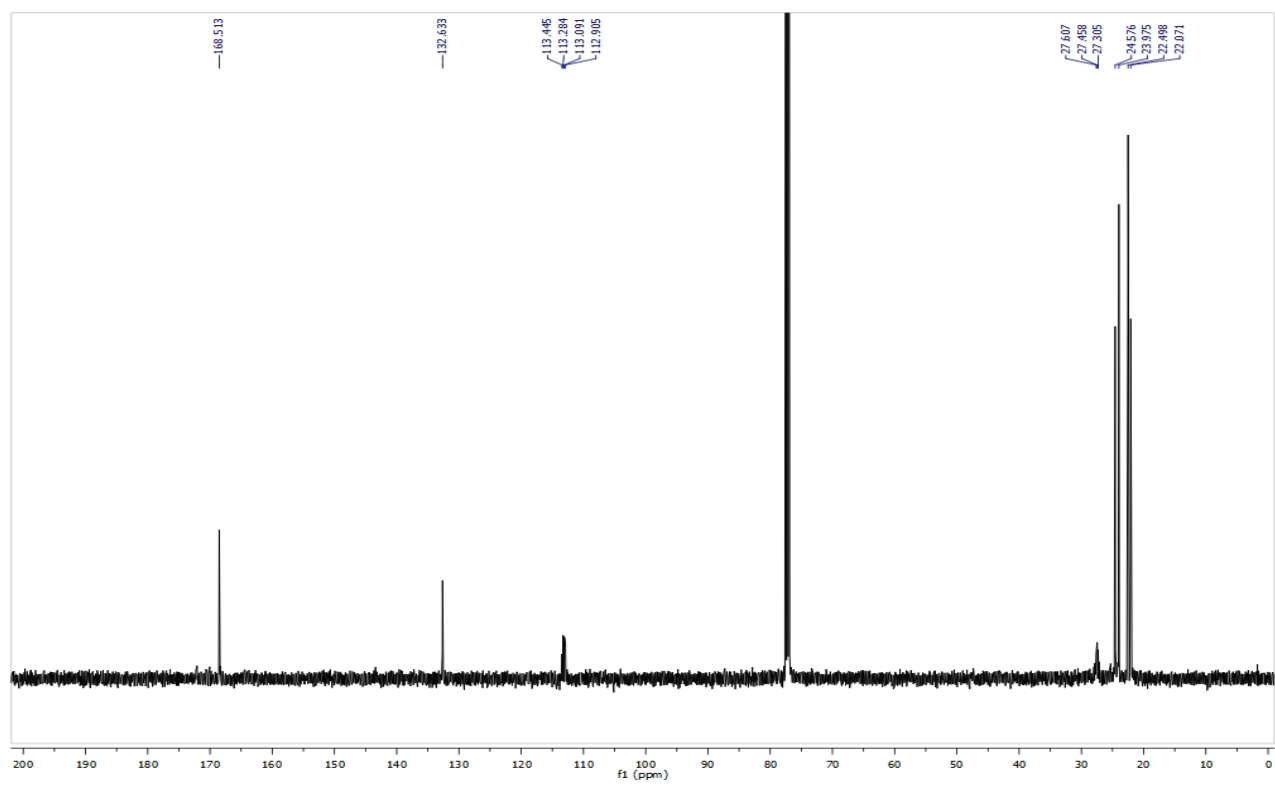

Supplement: NIHMS310246-supplement-1_si_001.pdf [file NIHMS310246-supplement-1_si_001.pdf]
